# Supplementary material
Source: publisher figshare collection journal article supplement (https://acs.figshare.com/ndownloader/files/5166976)
Supplement: Supplementary file 1 [file 5166976]

  
data_Compound1 
  
_audit_creation_method            SHELXL-97 
_chemical_name_systematic 
; 
 ? 
; 
_chemical_name_common             ? 
_chemical_melting_point           ? 
_chemical_formula_moiety          ? 
_chemical_formula_sum 
 'C120 H114 Cl8 Fe2 N6 O12 S2' 
_chemical_formula_weight          2291.59 
  
loop_ 
 _atom_type_symbol 
 _atom_type_description 
 _atom_type_scat_dispersion_real 
 _atom_type_scat_dispersion_imag 
 _atom_type_scat_source 
 'C'  'C'   0.0033   0.0016 
 'International Tables Vol C Tables 4.2.6.8 and 6.1.1.4' 
 'H'  'H'   0.0000   0.0000 
 'International Tables Vol C Tables 4.2.6.8 and 6.1.1.4' 
 'N'  'N'   0.0061   0.0033 
 'International Tables Vol C Tables 4.2.6.8 and 6.1.1.4' 
 'O'  'O'   0.0106   0.0060 
 'International Tables Vol C Tables 4.2.6.8 and 6.1.1.4' 
 'S'  'S'   0.1246   0.1234 
 'International Tables Vol C Tables 4.2.6.8 and 6.1.1.4' 
 'Fe'  'Fe'   0.3463   0.8444 
 'International Tables Vol C Tables 4.2.6.8 and 6.1.1.4' 
 'Cl'  'Cl'   0.1484   0.1585 
 'International Tables Vol C Tables 4.2.6.8 and 6.1.1.4' 
  
_symmetry_cell_setting            Triclinic 
_symmetry_space_group_name_H-M    P-1 
  
loop_ 
 _symmetry_equiv_pos_as_xyz 
 'x, y, z' 
 '-x, -y, -z' 
  
_cell_length_a                    15.219(3) 
_cell_length_b                    19.752(4) 
_cell_length_c                    21.337(4) 
_cell_angle_alpha                 116.18(3) 
_cell_angle_beta                  105.44(3) 
_cell_angle_gamma                 90.63(3) 
_cell_volume                      5486.7(19) 
_cell_formula_units_Z             2 
_cell_measurement_temperature     173(2) 
_cell_measurement_reflns_used     880 
_cell_measurement_theta_min       12.89 
_cell_measurement_theta_max       17.93 
  
_exptl_crystal_description        rod	 
_exptl_crystal_colour             'light yellow' 
_exptl_crystal_size_max           0.30 
_exptl_crystal_size_mid           0.12 
_exptl_crystal_size_min           0.10 
_exptl_crystal_density_meas       0 
_exptl_crystal_density_diffrn     1.387 
_exptl_crystal_density_method     'not measured' 
_exptl_crystal_F_000              2384 
_exptl_absorpt_coefficient_mu     0.562 
_exptl_absorpt_correction_type    'sadabs' 
_exptl_absorpt_correction_T_min   0.893347
_exptl_absorpt_correction_T_max   1.000000 
_exptl_absorpt_process_details    ? 
  
_exptl_special_details 
; 
 ? 
; 
  
_diffrn_ambient_temperature       173(2) 
_diffrn_radiation_wavelength      0.71073 
_diffrn_radiation_type            MoK\a 
_diffrn_radiation_source          'fine-focus sealed tube' 
_diffrn_radiation_monochromator   graphite 
_diffrn_measurement_device_type   'CCD area detector' 
_diffrn_measurement_method        'phi and omega scans' 
_diffrn_detector_area_resol_mean  ? 
_diffrn_standards_number          ? 
_diffrn_standards_interval_count  ? 
_diffrn_standards_interval_time   ? 
_diffrn_standards_decay_%         ? 
_diffrn_reflns_number             47931 
_diffrn_reflns_av_R_equivalents   0.0471 
_diffrn_reflns_av_sigmaI/netI     0.0915 
_diffrn_reflns_limit_h_min        -19 
_diffrn_reflns_limit_h_max        19 
_diffrn_reflns_limit_k_min        -25 
_diffrn_reflns_limit_k_max        26 
_diffrn_reflns_limit_l_min        -28 
_diffrn_reflns_limit_l_max        27 
_diffrn_reflns_theta_min          1.12 
_diffrn_reflns_theta_max          28.31 
_reflns_number_total              24367 
_reflns_number_gt                 15237 
_reflns_threshold_expression      >2sigma(I) 
  
_computing_data_collection        'Bruker SMART' 
_computing_cell_refinement        'Bruker SMART' 
_computing_data_reduction         'Bruker SAINT' 
_computing_structure_solution     'SHELXS-97 (Sheldrick, 1990)' 
_computing_structure_refinement   'SHELXL-97 (Sheldrick, 1997)' 
_computing_molecular_graphics     'Bruker SHELXTL' 
_computing_publication_material   'Bruker SHELXTL' 
  
_refine_special_details 
; 
 Refinement of F^2^ against ALL reflections.  The weighted R-factor wR and 
 goodness of fit S are based on F^2^, conventional R-factors R are based 
 on F, with F set to zero for negative F^2^. The threshold expression of 
 F^2^ > 2sigma(F^2^) is used only for calculating R-factors(gt) etc. and is 
 not relevant to the choice of reflections for refinement.  R-factors based 
 on F^2^ are statistically about twice as large as those based on F, and R- 
 factors based on ALL data will be even larger. 
; 
  
_refine_ls_structure_factor_coef  Fsqd 
_refine_ls_matrix_type            full 
_refine_ls_weighting_scheme       calc 
_refine_ls_weighting_details 
 'calc w=1/[\s^2^(Fo^2^)+(0.0725P)^2^+4.8740P] where P=(Fo^2^+2Fc^2^)/3' 
_atom_sites_solution_primary      direct 
_atom_sites_solution_secondary    difmap 
_atom_sites_solution_hydrogens    geom 
_refine_ls_hydrogen_treatment     mixed 
_refine_ls_extinction_method      none 
_refine_ls_extinction_coef        ? 
_refine_ls_number_reflns          24367 
_refine_ls_number_parameters      1369 
_refine_ls_number_restraints      0 
_refine_ls_R_factor_all           0.1266 
_refine_ls_R_factor_gt            0.0743 
_refine_ls_wR_factor_ref          0.1836 
_refine_ls_wR_factor_gt           0.1580 
_refine_ls_goodness_of_fit_ref    1.026 
_refine_ls_restrained_S_all       1.026 
_refine_ls_shift/su_max           0.653 
_refine_ls_shift/su_mean          0.023 
  
loop_ 
 _atom_site_label 
 _atom_site_type_symbol 
 _atom_site_fract_x 
 _atom_site_fract_y 
 _atom_site_fract_z 
 _atom_site_U_iso_or_equiv 
 _atom_site_adp_type 
 _atom_site_occupancy 
 _atom_site_symmetry_multiplicity 
 _atom_site_calc_flag 
 _atom_site_refinement_flags 
 _atom_site_disorder_assembly 
 _atom_site_disorder_group 
Fe2 Fe 0.23870(3) 0.27943(3) 0.57671(3) 0.01919(13) Uani 1 1 d . . . 
Fe1 Fe 0.22830(3) 0.23763(3) 0.43465(3) 0.02048(13) Uani 1 1 d . . . 
O1 O 0.37108(16) 0.25054(14) 0.47678(13) 0.0237(6) Uani 1 1 d . . . 
O2 O 0.37489(16) 0.31286(14) 0.59432(13) 0.0227(6) Uani 1 1 d . . . 
O3 O 0.21870(17) 0.12564(14) 0.41761(14) 0.0273(6) Uani 1 1 d . . . 
O4 O 0.26521(16) 0.16480(14) 0.53813(14) 0.0238(6) Uani 1 1 d . . . 
O5 O 0.08827(16) 0.23504(14) 0.41974(14) 0.0249(6) Uani 1 1 d . . . 
O6 O 0.10039(16) 0.23622(14) 0.52647(13) 0.0226(5) Uani 1 1 d . . . 
O7 O 0.23742(16) 0.36048(14) 0.48414(13) 0.0237(6) Uani 1 1 d . . . 
O8 O 0.20978(17) 0.38456(14) 0.58923(14) 0.0242(6) Uani 1 1 d . . . 
O9 O 0.3256(2) 0.11365(18) 0.10544(17) 0.0498(8) Uani 1 1 d . . . 
O10 O 0.1570(2) 0.10070(17) 0.05756(15) 0.0470(8) Uani 1 1 d . . . 
O11 O 0.1614(3) 0.3973(2) 0.91237(19) 0.0652(11) Uani 1 1 d . . . 
O12 O 0.3310(3) 0.4139(2) 0.95528(17) 0.0631(10) Uani 1 1 d . . . 
N3 N 0.1711(3) 0.4684(2) 0.1000(2) 0.0465(10) Uani 1 1 d . . . 
N2 N 0.2357(2) 0.17467(19) 0.18995(17) 0.0299(8) Uani 1 1 d . . . 
N1 N 0.2290(2) 0.24793(18) 0.33913(17) 0.0272(7) Uani 1 1 d . . . 
H3B H 0.2275 0.2977 0.3493 0.033 Uiso 1 1 calc R . . 
N6 N 0.3401(3) 0.0513(3) 0.9195(2) 0.0549(11) Uani 1 1 d . . . 
N5 N 0.2485(2) 0.3403(2) 0.82379(18) 0.0343(8) Uani 1 1 d . . . 
N4 N 0.2472(2) 0.26967(18) 0.67320(17) 0.0261(7) Uani 1 1 d . . . 
H6B H 0.2487 0.2199 0.6627 0.031 Uiso 1 1 calc R . . 
S1 S 0.24238(8) 0.14659(7) 0.10684(6) 0.0383(3) Uani 1 1 d . . . 
S2 S 0.24554(10) 0.36642(7) 0.90780(6) 0.0488(3) Uani 1 1 d . . . 
C1 C 0.2364(3) -0.0689(2) 0.4902(3) 0.0422(11) Uani 1 1 d . . . 
H1A H 0.2120 -0.0896 0.5146 0.051 Uiso 1 1 calc R . . 
C2 C 0.4227(4) 0.5172(3) 0.8174(2) 0.0463(12) Uani 1 1 d . . . 
C3 C 0.0516(3) 0.3606(3) 0.0575(3) 0.0475(12) Uani 1 1 d . . . 
H3A H 0.0058 0.3891 0.0490 0.057 Uiso 1 1 calc R . . 
C4 C 0.2887(3) -0.1103(3) 0.4468(3) 0.0475(12) Uani 1 1 d . . . 
H4A H 0.2991 -0.1585 0.4419 0.057 Uiso 1 1 calc R . . 
C5 C 0.3458(4) 0.5533(3) 0.8204(3) 0.0543(14) Uani 1 1 d . . . 
H5A H 0.3299 0.5739 0.8636 0.065 Uiso 1 1 calc R . . 
C6 C 0.4044(4) 0.2741(3) 0.9490(3) 0.0539(14) Uani 1 1 d . . . 
H6A H 0.4191 0.3222 0.9536 0.065 Uiso 1 1 calc R . . 
C7 C 0.0594(4) 0.4909(3) 0.7963(2) 0.0519(13) Uani 1 1 d . . . 
H7A H 0.0950 0.5309 0.7957 0.078 Uiso 1 1 calc R . . 
H7B H 0.0984 0.4713 0.8259 0.078 Uiso 1 1 calc R . . 
H7C H 0.0104 0.5107 0.8164 0.078 Uiso 1 1 calc R . . 
C8 C 0.3119(3) 0.0143(3) 0.3101(3) 0.0464(12) Uani 1 1 d . . . 
H8A H 0.2497 -0.0055 0.2882 0.056 Uiso 1 1 calc R . . 
C9 C 0.4509(4) 0.0669(3) 0.3043(3) 0.0511(13) Uani 1 1 d . . . 
C10 C 0.1190(3) 0.0687(3) 0.6561(3) 0.0430(11) Uani 1 1 d . . . 
H10A H 0.1309 0.0668 0.7004 0.052 Uiso 1 1 calc R . . 
C11 C 0.3596(4) 0.0369(3) 0.2738(3) 0.0544(13) Uani 1 1 d . . . 
H11A H 0.3286 0.0314 0.2275 0.065 Uiso 1 1 calc R . . 
C12 C 0.0910(3) 0.2438(3) 0.0591(2) 0.0426(11) Uani 1 1 d . . . 
H12A H 0.0723 0.1954 0.0523 0.051 Uiso 1 1 calc R . . 
C105 C 0.1029(4) 0.5033(3) 0.0664(3) 0.0586(14) Uani 1 1 d . . . 
H10B H 0.0757 0.4686 0.0154 0.088 Uiso 1 1 calc R . . 
H10C H 0.1323 0.5494 0.0714 0.088 Uiso 1 1 calc R . . 
H10D H 0.0559 0.5150 0.0904 0.088 Uiso 1 1 calc R . . 
C13 C -0.0093(3) 0.0367(2) 0.1845(2) 0.0396(11) Uani 1 1 d . . . 
C14 C 0.3624(4) 0.1266(3) 0.9309(3) 0.0510(13) Uani 1 1 d . . . 
C15 C 0.0269(3) 0.2860(3) 0.0439(2) 0.0460(12) Uani 1 1 d . . . 
H15A H -0.0350 0.2648 0.0240 0.055 Uiso 1 1 calc R . . 
C16 C 0.2914(3) 0.5597(3) 0.7600(2) 0.0445(11) Uani 1 1 d . . . 
H16A H 0.2394 0.5837 0.7632 0.053 Uiso 1 1 calc R . . 
C17 C 0.1772(3) 0.0400(3) 0.6139(3) 0.0406(11) Uani 1 1 d . . . 
H17A H 0.2273 0.0190 0.6300 0.049 Uiso 1 1 calc R . . 
C18 C 0.3255(3) -0.0800(2) 0.4107(3) 0.0420(11) Uani 1 1 d . . . 
H18A H 0.3620 -0.1075 0.3824 0.050 Uiso 1 1 calc R . . 
C19 C 0.4739(3) 0.1835(2) 0.6129(2) 0.0333(9) Uani 1 1 d . . . 
H19A H 0.4506 0.1669 0.5627 0.040 Uiso 1 1 calc R . . 
C20 C 0.4468(3) 0.1404(3) 0.6428(3) 0.0417(11) Uani 1 1 d . . . 
H20A H 0.4062 0.0952 0.6121 0.050 Uiso 1 1 calc R . . 
C21 C 0.6656(3) 0.3186(2) 0.6493(2) 0.0335(10) Uani 1 1 d . . . 
H21A H 0.7019 0.3097 0.6867 0.040 Uiso 1 1 calc R . . 
C22 C 0.3730(3) 0.3305(3) 0.1191(2) 0.0431(11) Uani 1 1 d . . . 
H22A H 0.4341 0.3482 0.1281 0.052 Uiso 1 1 calc R . . 
C23 C 0.3820(3) 0.4424(3) 0.3193(2) 0.0436(11) Uani 1 1 d . . . 
H23A H 0.3320 0.4688 0.3325 0.065 Uiso 1 1 calc R . . 
H23B H 0.3589 0.3994 0.2716 0.065 Uiso 1 1 calc R . . 
H23C H 0.4269 0.4764 0.3187 0.065 Uiso 1 1 calc R . . 
C24 C 0.1423(3) 0.3924(3) 0.0831(2) 0.0413(11) Uani 1 1 d . . . 
C25 C 0.1640(3) 0.2928(3) 0.6961(2) 0.0397(11) Uani 1 1 d . . . 
H25A H 0.1102 0.2588 0.6575 0.048 Uiso 1 1 calc R . . 
H25B H 0.1580 0.3439 0.7017 0.048 Uiso 1 1 calc R . . 
C26 C 0.3495(3) 0.2607(3) 0.1161(2) 0.0401(11) Uani 1 1 d . . . 
H26A H 0.3959 0.2332 0.1256 0.048 Uiso 1 1 calc R . . 
C27 C 0.0872(3) 0.0756(2) 0.5263(2) 0.0302(9) Uani 1 1 d . . . 
H27A H 0.0759 0.0789 0.4827 0.036 Uiso 1 1 calc R . . 
C28 C 0.4785(3) 0.1626(3) 0.7170(3) 0.0442(11) Uani 1 1 d . . . 
C29 C 0.5672(3) 0.2737(3) 0.7312(2) 0.0397(11) Uani 1 1 d . . . 
H29A H 0.6078 0.3189 0.7620 0.048 Uiso 1 1 calc R . . 
C30 C -0.0681(3) 0.0898(3) 0.1860(2) 0.0412(11) Uani 1 1 d . . . 
H30A H -0.0896 0.0980 0.1451 0.049 Uiso 1 1 calc R . . 
C31 C 0.5392(3) 0.2301(3) 0.7606(3) 0.0478(12) Uani 1 1 d . . . 
H31A H 0.5619 0.2467 0.8108 0.057 Uiso 1 1 calc R . . 
C32 C 0.0296(3) 0.1040(2) 0.5690(2) 0.0354(10) Uani 1 1 d . . . 
H32A H -0.0195 0.1263 0.5537 0.042 Uiso 1 1 calc R . . 
C33 C 0.0894(3) 0.4067(2) 0.2985(2) 0.0355(10) Uani 1 1 d . . . 
H33A H 0.1042 0.4090 0.2598 0.043 Uiso 1 1 calc R . . 
C34 C 0.0190(3) 0.4272(2) 0.7187(2) 0.0357(10) Uani 1 1 d . . . 
C35 C 0.0136(3) 0.3563(2) 0.2839(2) 0.0335(10) Uani 1 1 d . . . 
C36 C 0.3060(3) 0.3726(3) 0.1088(2) 0.0407(11) Uani 1 1 d . . . 
H36A H 0.3222 0.4196 0.1115 0.049 Uiso 1 1 calc R . . 
C37 C 0.4444(3) 0.4887(3) 0.7527(3) 0.0424(11) Uani 1 1 d . . . 
H37A H 0.4961 0.4644 0.7493 0.051 Uiso 1 1 calc R . . 
C38 C -0.0952(3) 0.1309(3) 0.2475(2) 0.0374(10) Uani 1 1 d . . . 
H38A H -0.1358 0.1656 0.2470 0.045 Uiso 1 1 calc R . . 
C39 C 0.1507(3) 0.2014(3) 0.2057(2) 0.0344(10) Uani 1 1 d . . . 
H39A H 0.0975 0.1680 0.1658 0.041 Uiso 1 1 calc R . . 
H39B H 0.1488 0.2525 0.2106 0.041 Uiso 1 1 calc R . . 
C40 C 0.3559(3) 0.0209(2) 0.3782(2) 0.0336(10) Uani 1 1 d . . . 
C41 C 0.3310(3) 0.3132(3) 0.8045(2) 0.0446(12) Uani 1 1 d . . . 
H41A H 0.3328 0.2615 0.7980 0.054 Uiso 1 1 calc R . . 
H41B H 0.3856 0.3454 0.8434 0.054 Uiso 1 1 calc R . . 
C42 C 0.0233(3) 0.0274(2) 0.2469(2) 0.0376(10) Uani 1 1 d . . . 
H42A H 0.0637 -0.0075 0.2472 0.045 Uiso 1 1 calc R . . 
C43 C 0.0481(3) 0.4012(2) 0.4144(2) 0.0323(9) Uani 1 1 d . . . 
H43A H 0.0334 0.3988 0.4531 0.039 Uiso 1 1 calc R . . 
C44 C 0.1446(3) 0.2481(3) 0.8971(2) 0.0493(13) Uani 1 1 d . . . 
H44A H 0.0960 0.2743 0.8887 0.059 Uiso 1 1 calc R . . 
C45 C 0.5349(3) 0.2506(2) 0.6561(2) 0.0294(9) Uani 1 1 d . . . 
C46 C -0.0030(3) 0.0691(2) 0.3087(2) 0.0342(10) Uani 1 1 d . . . 
H46A H 0.0199 0.0618 0.3499 0.041 Uiso 1 1 calc R . . 
C47 C -0.0700(3) 0.3034(2) 0.6340(2) 0.0311(9) Uani 1 1 d . . . 
H47A H -0.1066 0.2605 0.6258 0.037 Uiso 1 1 calc R . . 
C48 C -0.0059(3) 0.3545(3) 0.3431(2) 0.0373(10) Uani 1 1 d . . . 
H48A H -0.0564 0.3213 0.3347 0.045 Uiso 1 1 calc R . . 
C49 C 0.0430(3) 0.1001(3) 0.6342(3) 0.0416(11) Uani 1 1 d . . . 
C50 C 0.3091(3) 0.2410(3) 0.9264(2) 0.0406(11) Uani 1 1 d . . . 
C51 C 0.2193(3) 0.0033(2) 0.4984(2) 0.0306(9) Uani 1 1 d . . . 
C52 C 0.6538(3) 0.3670(2) 0.5635(2) 0.0320(9) Uani 1 1 d . . . 
H52A H 0.6820 0.3900 0.5426 0.038 Uiso 1 1 calc R . . 
C53 C 0.2342(3) 0.2802(3) 0.9140(2) 0.0461(12) Uani 1 1 d . . . 
C54 C -0.0356(3) 0.3626(3) 0.7043(2) 0.0362(10) Uani 1 1 d . . . 
H54A H -0.0496 0.3589 0.7426 0.043 Uiso 1 1 calc R . . 
C55 C 0.2902(3) 0.1679(3) 0.9198(2) 0.0450(12) Uani 1 1 d . . . 
C56 C 0.5003(3) 0.3749(2) 0.3685(2) 0.0348(10) Uani 1 1 d . . . 
H56A H 0.5232 0.3642 0.3293 0.042 Uiso 1 1 calc R . . 
C57 C 0.2145(3) 0.6402(2) 0.5944(2) 0.0363(10) Uani 1 1 d . . . 
H57A H 0.2123 0.6912 0.6059 0.044 Uiso 1 1 calc R . . 
C58 C 0.1620(3) 0.0421(2) 0.5472(2) 0.0314(9) Uani 1 1 d . . . 
C59 C 0.1432(3) 0.4536(2) 0.3697(2) 0.0322(9) Uani 1 1 d . . . 
H59A H 0.1932 0.4873 0.3780 0.039 Uiso 1 1 calc R . . 
C60 C 0.3916(3) 0.4953(2) 0.6928(2) 0.0335(10) Uani 1 1 d . . . 
H60A H 0.4086 0.4756 0.6500 0.040 Uiso 1 1 calc R . . 
C61 C 0.3292(3) 0.3153(3) 0.7339(2) 0.0396(11) Uani 1 1 d . . . 
H61A H 0.3317 0.3677 0.7422 0.048 Uiso 1 1 calc R . . 
H61B H 0.3835 0.2965 0.7206 0.048 Uiso 1 1 calc R . . 
C62 C 0.2557(3) 0.6201(2) 0.6482(2) 0.0334(10) Uani 1 1 d . . . 
H62A H 0.2810 0.6583 0.6960 0.040 Uiso 1 1 calc R . . 
C63 C 0.3149(3) 0.2258(2) 0.3205(2) 0.0315(9) Uani 1 1 d . . . 
H63A H 0.3217 0.1755 0.3167 0.038 Uiso 1 1 calc R . . 
H63B H 0.3670 0.2614 0.3599 0.038 Uiso 1 1 calc R . . 
C64 C -0.1904(3) 0.2279(2) 0.4788(2) 0.0277(9) Uani 1 1 d . . . 
H64A H -0.2203 0.2502 0.5141 0.033 Uiso 1 1 calc R . . 
C65 C 0.5712(3) 0.2944(2) 0.6241(2) 0.0284(9) Uani 1 1 d . . . 
C66 C 0.5085(2) 0.3660(2) 0.4791(2) 0.0253(8) Uani 1 1 d . . . 
C67 C 0.0045(3) 0.3720(2) 0.5903(2) 0.0260(8) Uani 1 1 d . . . 
H67A H 0.0191 0.3758 0.5522 0.031 Uiso 1 1 calc R . . 
C68 C 0.1652(3) 0.2920(3) 0.7662(2) 0.0442(12) Uani 1 1 d . . . 
H68A H 0.1111 0.3109 0.7797 0.053 Uiso 1 1 calc R . . 
H68B H 0.1643 0.2402 0.7598 0.053 Uiso 1 1 calc R . . 
C69 C 0.2118(3) 0.3468(3) 0.0941(2) 0.0374(10) Uani 1 1 d . . . 
C70 C 0.7070(3) 0.3554(2) 0.6203(2) 0.0362(10) Uani 1 1 d . . . 
H70A H 0.7701 0.3722 0.6389 0.043 Uiso 1 1 calc R . . 
C71 C 0.1480(3) 0.2015(3) 0.2763(2) 0.0334(10) Uani 1 1 d . . . 
H71A H 0.0928 0.2208 0.2874 0.040 Uiso 1 1 calc R . . 
H71B H 0.1442 0.1494 0.2692 0.040 Uiso 1 1 calc R . . 
C72 C 0.1867(3) 0.2728(3) 0.0853(2) 0.0355(10) Uani 1 1 d . . . 
C73 C 0.5412(3) 0.3505(2) 0.4194(2) 0.0328(9) Uani 1 1 d . . . 
H73A H 0.5906 0.3235 0.4139 0.039 Uiso 1 1 calc R . . 
C74 C -0.2416(3) 0.1774(2) 0.4081(2) 0.0338(10) Uani 1 1 d . . . 
H74A H -0.3051 0.1654 0.3959 0.041 Uiso 1 1 calc R . . 
C75 C 0.1765(3) 0.5839(2) 0.5236(2) 0.0303(9) Uani 1 1 d . . . 
H75A H 0.1503 0.5975 0.4870 0.036 Uiso 1 1 calc R . . 
C76 C 0.0381(3) 0.4314(2) 0.6606(2) 0.0321(9) Uani 1 1 d . . . 
H76A H 0.0739 0.4747 0.6689 0.038 Uiso 1 1 calc R . . 
C77 C 0.3086(3) -0.0084(2) 0.4161(2) 0.0310(9) Uani 1 1 d . . . 
C78 C -0.1967(3) 0.1451(2) 0.3559(2) 0.0311(9) Uani 1 1 d . . . 
H78A H -0.2308 0.1109 0.3082 0.037 Uiso 1 1 calc R . . 
C79 C 0.2607(3) 0.5446(2) 0.6334(2) 0.0264(8) Uani 1 1 d . . . 
C80 C 0.1240(3) 0.4514(2) 0.4287(2) 0.0269(9) Uani 1 1 d . . . 
C81 C 0.2590(3) 0.2314(3) 0.0993(2) 0.0362(10) Uani 1 1 d . . . 
C82 C 0.2561(3) 0.0337(2) 0.4610(2) 0.0279(9) Uani 1 1 d . . . 
C83 C 0.3941(3) 0.4300(2) 0.4339(2) 0.0299(9) Uani 1 1 d . . . 
H83A H 0.3444 0.4567 0.4393 0.036 Uiso 1 1 calc R . . 
C84 C 0.3140(3) 0.5307(2) 0.6953(2) 0.0275(9) Uani 1 1 d . . . 
C85 C -0.1019(3) 0.1622(2) 0.3725(2) 0.0268(9) Uani 1 1 d . . . 
C86 C 0.4260(3) 0.4153(2) 0.3743(2) 0.0313(9) Uani 1 1 d . . . 
C87 C 0.4348(2) 0.4059(2) 0.4855(2) 0.0264(9) Uani 1 1 d . . . 
H87A H 0.4121 0.4168 0.5248 0.032 Uiso 1 1 calc R . . 
C88 C 0.3169(3) 0.2247(3) 0.2496(2) 0.0373(10) Uani 1 1 d . . . 
H88A H 0.3173 0.2760 0.2547 0.045 Uiso 1 1 calc R . . 
H88B H 0.3725 0.2065 0.2385 0.045 Uiso 1 1 calc R . . 
C89 C 0.4525(3) 0.1608(3) 0.9540(3) 0.0537(13) Uani 1 1 d . . . 
H89A H 0.5005 0.1346 0.9634 0.064 Uiso 1 1 calc R . . 
C90 C 0.4720(4) 0.2345(4) 0.9633(3) 0.0575(15) Uani 1 1 d . . . 
H90A H 0.5331 0.2570 0.9799 0.069 Uiso 1 1 calc R . . 
C91 C 0.5585(2) 0.3450(2) 0.5368(2) 0.0257(8) Uani 1 1 d . . . 
C92 C -0.0632(3) 0.1215(2) 0.3101(2) 0.0282(9) Uani 1 1 d . . . 
C93 C 0.1957(3) 0.1373(3) 0.9032(2) 0.0488(12) Uani 1 1 d . . . 
H93A H 0.1823 0.0895 0.8996 0.059 Uiso 1 1 calc R . . 
C94 C 0.1271(3) 0.1762(3) 0.8928(3) 0.0492(13) Uani 1 1 d . . . 
H94A H 0.0668 0.1553 0.8825 0.059 Uiso 1 1 calc R . . 
C95 C 0.2457(2) 0.1143(2) 0.4734(2) 0.0237(8) Uani 1 1 d . . . 
C96 C -0.0504(2) 0.3073(2) 0.5753(2) 0.0241(8) Uani 1 1 d . . . 
C97 C 0.1764(3) 0.5073(2) 0.5057(2) 0.0262(8) Uani 1 1 d . . . 
C98 C -0.0499(2) 0.2126(2) 0.4445(2) 0.0229(8) Uani 1 1 d . . . 
C99 C 0.5165(2) 0.3092(2) 0.5681(2) 0.0244(8) Uani 1 1 d . . . 
C100 C 0.4129(2) 0.2890(2) 0.5440(2) 0.0232(8) Uani 1 1 d . . . 
C101 C 0.2199(2) 0.4867(2) 0.5605(2) 0.0232(8) Uani 1 1 d . . . 
C102 C 0.2227(2) 0.4039(2) 0.5428(2) 0.0218(8) Uani 1 1 d . . . 
C103 C -0.0949(2) 0.2465(2) 0.4986(2) 0.0223(8) Uani 1 1 d . . . 
C104 C 0.0538(2) 0.22958(19) 0.4652(2) 0.0215(8) Uani 1 1 d . . . 
C115 C 0.0212(4) -0.0089(3) 0.1173(3) 0.0577(15) Uani 1 1 d . . . 
H11B H -0.0080 0.0046 0.0794 0.087 Uiso 1 1 calc R . . 
H11C H 0.0039 -0.0624 0.1002 0.087 Uiso 1 1 calc R . . 
H11D H 0.0869 0.0024 0.1297 0.087 Uiso 1 1 calc R . . 
C114 C 0.4805(4) 0.5095(3) 0.8832(3) 0.0717(18) Uani 1 1 d . . . 
H11E H 0.5312 0.4834 0.8716 0.107 Uiso 1 1 calc R . . 
H11F H 0.4431 0.4810 0.8959 0.107 Uiso 1 1 calc R . . 
H11G H 0.5037 0.5593 0.9239 0.107 Uiso 1 1 calc R . . 
C113 C 0.4479(4) 0.1160(3) 0.7496(3) 0.0664(16) Uani 1 1 d . . . 
H11H H 0.4771 0.1404 0.8015 0.100 Uiso 1 1 calc R . . 
H11I H 0.4648 0.0659 0.7281 0.100 Uiso 1 1 calc R . . 
H11J H 0.3822 0.1118 0.7397 0.100 Uiso 1 1 calc R . . 
C112 C 0.4483(3) 0.0498(3) 0.4086(3) 0.0515(13) Uani 1 1 d . . . 
H11K H 0.4801 0.0539 0.4542 0.062 Uiso 1 1 calc R . . 
C111 C -0.0229(4) 0.1282(3) 0.6796(3) 0.0538(13) Uani 1 1 d . . . 
H11L H -0.0022 0.1207 0.7224 0.081 Uiso 1 1 calc R . . 
H11M H -0.0835 0.1001 0.6510 0.081 Uiso 1 1 calc R . . 
H11N H -0.0246 0.1815 0.6942 0.081 Uiso 1 1 calc R . . 
C110 C 0.2143(4) 0.5198(3) 0.1785(3) 0.0616(15) Uani 1 1 d . . . 
H11O H 0.2589 0.4955 0.1992 0.092 Uiso 1 1 calc R . . 
H11P H 0.1679 0.5313 0.2030 0.092 Uiso 1 1 calc R . . 
H11Q H 0.2443 0.5662 0.1844 0.092 Uiso 1 1 calc R . . 
C109 C 0.4941(4) 0.0726(4) 0.3717(3) 0.0653(16) Uani 1 1 d . . . 
H10E H 0.5564 0.0926 0.3934 0.078 Uiso 1 1 calc R . . 
C108 C -0.0476(3) 0.3069(3) 0.2070(3) 0.0489(12) Uani 1 1 d . . . 
H10F H -0.0242 0.3155 0.1731 0.073 Uiso 1 1 calc R . . 
H10G H -0.1090 0.3195 0.2026 0.073 Uiso 1 1 calc R . . 
H10H H -0.0488 0.2542 0.1961 0.073 Uiso 1 1 calc R . . 
C107 C 0.3051(4) -0.0025(3) 0.8425(3) 0.0775(18) Uani 1 1 d . . . 
H10I H 0.2590 0.0179 0.8181 0.116 Uiso 1 1 calc R . . 
H10J H 0.2783 -0.0498 0.8370 0.116 Uiso 1 1 calc R . . 
H10K H 0.3547 -0.0113 0.8212 0.116 Uiso 1 1 calc R . . 
C106 C 0.4092(4) 0.0224(4) 0.9577(3) 0.0774(18) Uani 1 1 d . . . 
H10L H 0.4321 0.0592 1.0084 0.116 Uiso 1 1 calc R . . 
H10M H 0.4590 0.0130 0.9366 0.116 Uiso 1 1 calc R . . 
H10N H 0.3827 -0.0243 0.9535 0.116 Uiso 1 1 calc R . . 
C116 C 0.5027(4) 0.0932(4) 0.2657(4) 0.089(2) Uani 1 1 d . . . 
H11R H 0.4617 0.0851 0.2193 0.134 Uiso 1 1 calc R . . 
H11S H 0.5528 0.0646 0.2578 0.134 Uiso 1 1 calc R . . 
H11T H 0.5264 0.1465 0.2953 0.134 Uiso 1 1 calc R . . 
C120 C 0.2636(6) 0.5776(4) -0.0071(4) 0.099(2) Uani 1 1 d . . . 
C121 C 0.5987(4) 0.2420(4) 0.1447(3) 0.0782(19) Uani 1 1 d . . . 
H12B H 0.5480 0.2237 0.0997 0.094 Uiso 1 1 calc R . . 
H12C H 0.6015 0.2968 0.1716 0.094 Uiso 1 1 calc R . . 
C122 C 0.7874(5) 0.1988(4) 0.7970(5) 0.111(3) Uani 1 1 d . . . 
C123 C 0.7636(5) 0.0662(4) 0.9592(5) 0.142(4) Uani 1 1 d . . . 
H12D H 0.7828 0.0287 0.9191 0.170 Uiso 1 1 calc R . . 
H12E H 0.7447 0.0403 0.9840 0.170 Uiso 1 1 calc R . . 
Cl1 Cl 0.3341(5) 0.6103(3) 0.0720(3) 0.1260(19) Uani 0.50 1 d P A 1 
Cl1A Cl 0.3853(3) 0.6136(3) 0.0444(3) 0.1007(14) Uani 0.50 1 d P A 2 
Cl2 Cl 0.2156(2) 0.65153(17) -0.02077(18) 0.1911(16) Uani 1 1 d . A . 
Cl3 Cl 0.69906(15) 0.22283(13) 0.12342(13) 0.1227(8) Uani 1 1 d . . . 
Cl4 Cl 0.57687(14) 0.20021(11) 0.19657(11) 0.0970(6) Uani 1 1 d . . . 
Cl5 Cl 0.67117(16) 0.10056(19) 0.92390(14) 0.1730(14) Uani 1 1 d . . . 
Cl6 Cl 0.84345(18) 0.27602(13) 0.79967(15) 0.1285(8) Uani 1 1 d . B . 
Cl7 Cl 0.8595(2) 0.1606(2) 0.8472(2) 0.0809(9) Uani 0.75 1 d P B 1 
Cl7A Cl 0.8206(17) 0.1816(9) 0.8593(9) 0.209(10) Uani 0.25 1 d P B 2 
Cl8 Cl 0.85657(12) 0.13548(10) 1.01977(9) 0.0789(5) Uani 1 1 d . . . 
  
loop_ 
 _atom_site_aniso_label 
 _atom_site_aniso_U_11 
 _atom_site_aniso_U_22 
 _atom_site_aniso_U_33 
 _atom_site_aniso_U_23 
 _atom_site_aniso_U_13 
 _atom_site_aniso_U_12 
Fe2 0.0201(3) 0.0207(3) 0.0184(3) 0.0104(2) 0.0058(2) 0.0038(2) 
Fe1 0.0207(3) 0.0228(3) 0.0182(3) 0.0100(2) 0.0054(2) 0.0021(2) 
O1 0.0233(13) 0.0242(14) 0.0211(14) 0.0091(12) 0.0052(11) 0.0035(11) 
O2 0.0201(13) 0.0239(14) 0.0230(14) 0.0102(12) 0.0057(11) 0.0024(10) 
O3 0.0316(15) 0.0241(14) 0.0247(15) 0.0106(12) 0.0072(12) 0.0046(11) 
O4 0.0252(13) 0.0208(13) 0.0245(15) 0.0095(12) 0.0076(11) 0.0051(11) 
O5 0.0238(13) 0.0263(14) 0.0253(14) 0.0121(12) 0.0082(11) -0.0002(11) 
O6 0.0212(13) 0.0241(14) 0.0204(14) 0.0096(11) 0.0041(11) 0.0035(10) 
O7 0.0237(13) 0.0223(13) 0.0225(14) 0.0080(12) 0.0073(11) 0.0035(11) 
O8 0.0253(13) 0.0248(14) 0.0252(14) 0.0125(12) 0.0103(11) 0.0047(11) 
O9 0.062(2) 0.049(2) 0.0329(18) 0.0086(16) 0.0228(16) 0.0143(17) 
O10 0.058(2) 0.0431(19) 0.0204(16) 0.0020(14) 0.0049(14) -0.0053(16) 
O11 0.088(3) 0.070(3) 0.047(2) 0.022(2) 0.044(2) 0.033(2) 
O12 0.083(3) 0.060(2) 0.0244(18) 0.0065(17) 0.0053(18) -0.005(2) 
N3 0.055(3) 0.051(3) 0.034(2) 0.018(2) 0.0150(19) 0.007(2) 
N2 0.0306(18) 0.0367(19) 0.0169(17) 0.0078(15) 0.0071(14) -0.0004(15) 
N1 0.0366(19) 0.0216(17) 0.0231(17) 0.0089(14) 0.0110(15) 0.0028(14) 
N6 0.053(3) 0.055(3) 0.049(3) 0.021(2) 0.010(2) 0.008(2) 
N5 0.042(2) 0.036(2) 0.0244(19) 0.0117(16) 0.0135(16) 0.0082(16) 
N4 0.0378(19) 0.0218(17) 0.0220(17) 0.0122(14) 0.0103(15) 0.0097(14) 
S1 0.0467(7) 0.0401(6) 0.0208(5) 0.0059(5) 0.0132(5) 0.0034(5) 
S2 0.0741(9) 0.0432(7) 0.0225(6) 0.0081(5) 0.0173(6) 0.0092(6) 
C1 0.047(3) 0.033(2) 0.055(3) 0.027(2) 0.016(2) 0.007(2) 
C2 0.058(3) 0.042(3) 0.031(3) 0.020(2) -0.005(2) -0.014(2) 
C3 0.040(3) 0.065(3) 0.037(3) 0.022(3) 0.014(2) 0.012(2) 
C4 0.049(3) 0.027(2) 0.069(4) 0.025(3) 0.017(3) 0.012(2) 
C5 0.085(4) 0.051(3) 0.028(3) 0.017(2) 0.023(3) 0.003(3) 
C6 0.056(3) 0.068(4) 0.031(3) 0.020(3) 0.009(2) -0.008(3) 
C7 0.062(3) 0.052(3) 0.032(3) 0.011(2) 0.015(2) 0.012(3) 
C8 0.039(3) 0.050(3) 0.047(3) 0.024(3) 0.007(2) 0.001(2) 
C9 0.053(3) 0.063(3) 0.053(3) 0.031(3) 0.032(3) 0.018(3) 
C10 0.058(3) 0.047(3) 0.036(3) 0.028(2) 0.017(2) 0.005(2) 
C11 0.060(3) 0.059(3) 0.043(3) 0.025(3) 0.012(3) 0.011(3) 
C12 0.042(3) 0.053(3) 0.028(2) 0.014(2) 0.012(2) -0.001(2) 
C105 0.067(4) 0.068(4) 0.053(3) 0.033(3) 0.027(3) 0.019(3) 
C13 0.049(3) 0.034(2) 0.024(2) 0.004(2) 0.012(2) -0.009(2) 
C14 0.050(3) 0.067(4) 0.030(3) 0.019(3) 0.010(2) 0.010(3) 
C15 0.035(3) 0.066(3) 0.032(3) 0.019(3) 0.010(2) 0.002(2) 
C16 0.060(3) 0.039(3) 0.037(3) 0.016(2) 0.021(2) 0.012(2) 
C17 0.044(3) 0.043(3) 0.046(3) 0.032(2) 0.010(2) 0.009(2) 
C18 0.039(2) 0.027(2) 0.054(3) 0.011(2) 0.017(2) 0.0142(19) 
C19 0.031(2) 0.034(2) 0.035(2) 0.017(2) 0.0072(19) 0.0123(18) 
C20 0.044(3) 0.037(3) 0.045(3) 0.021(2) 0.010(2) 0.011(2) 
C21 0.027(2) 0.036(2) 0.026(2) 0.0065(19) 0.0024(17) 0.0119(18) 
C22 0.037(3) 0.061(3) 0.029(2) 0.020(2) 0.010(2) 0.000(2) 
C23 0.050(3) 0.051(3) 0.033(3) 0.022(2) 0.012(2) 0.009(2) 
C24 0.048(3) 0.052(3) 0.023(2) 0.014(2) 0.015(2) 0.006(2) 
C25 0.030(2) 0.063(3) 0.024(2) 0.018(2) 0.0088(18) 0.005(2) 
C26 0.036(2) 0.058(3) 0.023(2) 0.014(2) 0.0118(19) 0.006(2) 
C27 0.038(2) 0.022(2) 0.030(2) 0.0136(18) 0.0078(19) -0.0014(17) 
C28 0.047(3) 0.045(3) 0.047(3) 0.029(3) 0.010(2) 0.015(2) 
C29 0.033(2) 0.048(3) 0.031(2) 0.017(2) 0.0025(19) 0.004(2) 
C30 0.047(3) 0.047(3) 0.023(2) 0.015(2) 0.004(2) -0.005(2) 
C31 0.046(3) 0.064(3) 0.038(3) 0.030(3) 0.008(2) 0.017(3) 
C32 0.036(2) 0.031(2) 0.045(3) 0.021(2) 0.014(2) 0.0059(18) 
C33 0.036(2) 0.044(3) 0.033(2) 0.022(2) 0.014(2) 0.010(2) 
C34 0.036(2) 0.039(3) 0.031(2) 0.013(2) 0.0148(19) 0.0149(19) 
C35 0.031(2) 0.039(2) 0.028(2) 0.014(2) 0.0064(18) 0.0082(18) 
C36 0.041(3) 0.055(3) 0.024(2) 0.015(2) 0.011(2) -0.002(2) 
C37 0.039(3) 0.044(3) 0.044(3) 0.026(2) 0.001(2) 0.002(2) 
C38 0.037(2) 0.043(3) 0.031(2) 0.019(2) 0.006(2) 0.001(2) 
C39 0.034(2) 0.044(3) 0.021(2) 0.013(2) 0.0046(18) 0.0028(19) 
C40 0.035(2) 0.026(2) 0.034(2) 0.0063(19) 0.0148(19) 0.0092(18) 
C41 0.035(2) 0.067(3) 0.027(2) 0.020(2) 0.005(2) 0.008(2) 
C42 0.045(3) 0.031(2) 0.036(3) 0.012(2) 0.016(2) 0.0061(19) 
C43 0.026(2) 0.046(3) 0.030(2) 0.023(2) 0.0061(18) 0.0006(18) 
C44 0.047(3) 0.073(4) 0.029(3) 0.024(3) 0.013(2) 0.012(3) 
C45 0.024(2) 0.033(2) 0.027(2) 0.0124(19) 0.0037(17) 0.0115(17) 
C46 0.041(2) 0.030(2) 0.030(2) 0.0132(19) 0.0105(19) 0.0008(19) 
C47 0.026(2) 0.039(2) 0.037(2) 0.024(2) 0.0118(18) 0.0089(18) 
C48 0.028(2) 0.044(3) 0.036(3) 0.018(2) 0.0061(19) -0.0021(19) 
C49 0.050(3) 0.040(3) 0.043(3) 0.025(2) 0.018(2) 0.004(2) 
C50 0.041(3) 0.059(3) 0.019(2) 0.016(2) 0.0088(19) 0.004(2) 
C51 0.037(2) 0.024(2) 0.032(2) 0.0153(19) 0.0089(19) 0.0069(17) 
C52 0.026(2) 0.031(2) 0.037(2) 0.010(2) 0.0168(19) 0.0065(17) 
C53 0.052(3) 0.059(3) 0.020(2) 0.012(2) 0.010(2) 0.003(2) 
C54 0.035(2) 0.050(3) 0.030(2) 0.021(2) 0.0153(19) 0.015(2) 
C55 0.052(3) 0.058(3) 0.024(2) 0.018(2) 0.012(2) 0.007(2) 
C56 0.037(2) 0.039(2) 0.029(2) 0.011(2) 0.0186(19) 0.0026(19) 
C57 0.042(2) 0.025(2) 0.046(3) 0.019(2) 0.015(2) 0.0069(19) 
C58 0.035(2) 0.025(2) 0.036(2) 0.0158(19) 0.0111(19) 0.0026(17) 
C59 0.026(2) 0.036(2) 0.040(3) 0.021(2) 0.0135(19) 0.0026(17) 
C60 0.038(2) 0.030(2) 0.031(2) 0.0125(19) 0.0092(19) 0.0040(18) 
C61 0.029(2) 0.064(3) 0.029(2) 0.024(2) 0.0079(19) 0.005(2) 
C62 0.040(2) 0.025(2) 0.032(2) 0.0102(19) 0.0122(19) 0.0057(18) 
C63 0.030(2) 0.040(2) 0.019(2) 0.0109(19) 0.0050(17) -0.0045(18) 
C64 0.025(2) 0.031(2) 0.034(2) 0.0199(19) 0.0121(18) 0.0058(17) 
C65 0.024(2) 0.027(2) 0.026(2) 0.0061(18) 0.0065(17) 0.0076(16) 
C66 0.0218(19) 0.025(2) 0.024(2) 0.0067(17) 0.0079(16) -0.0010(15) 
C67 0.027(2) 0.028(2) 0.030(2) 0.0167(18) 0.0107(17) 0.0097(16) 
C68 0.036(2) 0.071(3) 0.028(2) 0.024(2) 0.011(2) 0.007(2) 
C69 0.041(3) 0.050(3) 0.017(2) 0.011(2) 0.0099(19) 0.002(2) 
C70 0.021(2) 0.038(2) 0.038(3) 0.007(2) 0.0094(19) 0.0060(17) 
C71 0.028(2) 0.044(3) 0.029(2) 0.017(2) 0.0086(18) 0.0048(18) 
C72 0.036(2) 0.051(3) 0.016(2) 0.011(2) 0.0098(18) 0.002(2) 
C73 0.030(2) 0.036(2) 0.032(2) 0.012(2) 0.0154(19) 0.0072(18) 
C74 0.021(2) 0.042(3) 0.045(3) 0.027(2) 0.0091(19) 0.0018(18) 
C75 0.028(2) 0.033(2) 0.036(2) 0.022(2) 0.0101(18) 0.0065(17) 
C76 0.028(2) 0.031(2) 0.036(2) 0.014(2) 0.0104(19) 0.0064(17) 
C77 0.029(2) 0.024(2) 0.033(2) 0.0096(18) 0.0055(18) 0.0050(17) 
C78 0.027(2) 0.027(2) 0.027(2) 0.0091(18) -0.0037(17) -0.0078(17) 
C79 0.031(2) 0.023(2) 0.027(2) 0.0101(17) 0.0128(17) 0.0019(16) 
C80 0.025(2) 0.030(2) 0.032(2) 0.0197(19) 0.0088(17) 0.0096(16) 
C81 0.040(2) 0.046(3) 0.019(2) 0.011(2) 0.0109(18) 0.003(2) 
C82 0.028(2) 0.020(2) 0.029(2) 0.0091(17) 0.0027(17) 0.0040(16) 
C83 0.031(2) 0.028(2) 0.029(2) 0.0111(19) 0.0106(18) 0.0038(17) 
C84 0.037(2) 0.0185(19) 0.024(2) 0.0088(17) 0.0076(18) 0.0005(16) 
C85 0.028(2) 0.027(2) 0.026(2) 0.0156(18) 0.0036(17) 0.0002(16) 
C86 0.039(2) 0.029(2) 0.022(2) 0.0077(18) 0.0098(18) -0.0010(18) 
C87 0.0232(19) 0.026(2) 0.026(2) 0.0066(17) 0.0111(16) -0.0017(16) 
C88 0.033(2) 0.052(3) 0.020(2) 0.010(2) 0.0093(18) -0.004(2) 
C89 0.042(3) 0.072(4) 0.040(3) 0.023(3) 0.007(2) 0.007(3) 
C90 0.039(3) 0.089(4) 0.039(3) 0.030(3) 0.003(2) 0.002(3) 
C91 0.0192(18) 0.029(2) 0.022(2) 0.0049(17) 0.0081(16) 0.0067(15) 
C92 0.027(2) 0.029(2) 0.024(2) 0.0115(18) 0.0011(17) -0.0026(17) 
C93 0.045(3) 0.064(3) 0.035(3) 0.021(3) 0.011(2) -0.003(2) 
C94 0.040(3) 0.077(4) 0.035(3) 0.031(3) 0.010(2) 0.004(3) 
C95 0.0206(18) 0.023(2) 0.028(2) 0.0123(18) 0.0084(16) 0.0060(15) 
C96 0.0201(18) 0.030(2) 0.027(2) 0.0145(18) 0.0105(16) 0.0109(15) 
C97 0.0240(19) 0.029(2) 0.032(2) 0.0175(19) 0.0127(17) 0.0051(16) 
C98 0.0224(19) 0.0230(19) 0.027(2) 0.0146(17) 0.0068(16) 0.0016(15) 
C99 0.0189(18) 0.025(2) 0.021(2) 0.0033(16) 0.0056(15) 0.0061(15) 
C100 0.0241(19) 0.0213(19) 0.025(2) 0.0119(17) 0.0068(17) 0.0066(15) 
C101 0.0221(18) 0.025(2) 0.028(2) 0.0149(17) 0.0102(16) 0.0050(15) 
C102 0.0143(17) 0.0232(19) 0.023(2) 0.0093(17) 0.0014(15) 0.0002(14) 
C103 0.0225(18) 0.0233(19) 0.026(2) 0.0169(17) 0.0052(16) 0.0034(15) 
C104 0.0223(18) 0.0165(18) 0.024(2) 0.0083(16) 0.0064(16) 0.0017(14) 
C115 0.085(4) 0.047(3) 0.041(3) 0.012(3) 0.034(3) 0.000(3) 
C114 0.084(4) 0.080(4) 0.044(3) 0.041(3) -0.012(3) -0.019(3) 
C113 0.079(4) 0.072(4) 0.072(4) 0.054(4) 0.025(3) 0.017(3) 
C112 0.037(3) 0.069(4) 0.041(3) 0.021(3) 0.010(2) -0.004(2) 
C111 0.059(3) 0.060(3) 0.059(3) 0.033(3) 0.034(3) 0.012(3) 
C110 0.072(4) 0.054(3) 0.045(3) 0.013(3) 0.014(3) 0.004(3) 
C109 0.035(3) 0.096(5) 0.070(4) 0.042(4) 0.018(3) -0.002(3) 
C108 0.046(3) 0.053(3) 0.040(3) 0.018(2) 0.007(2) 0.005(2) 
C107 0.080(4) 0.059(4) 0.065(4) 0.007(3) 0.017(3) 0.001(3) 
C106 0.088(5) 0.072(4) 0.074(4) 0.033(4) 0.025(4) 0.030(4) 
C116 0.072(4) 0.136(6) 0.104(5) 0.080(5) 0.050(4) 0.026(4) 
C120 0.112(6) 0.084(5) 0.097(6) 0.031(5) 0.046(5) -0.009(5) 
C121 0.055(4) 0.113(5) 0.061(4) 0.041(4) 0.009(3) -0.001(4) 
C122 0.091(5) 0.103(6) 0.145(7) 0.090(6) -0.014(5) 0.005(4) 
C123 0.060(5) 0.072(5) 0.214(10) -0.001(6) 0.038(6) 0.002(4) 
Cl1 0.174(6) 0.088(3) 0.073(3) 0.018(2) 0.005(3) 0.003(4) 
Cl1A 0.092(3) 0.077(3) 0.095(3) 0.026(3) -0.003(2) -0.003(2) 
Cl2 0.127(2) 0.146(2) 0.183(3) -0.001(2) 0.0014(19) 0.0763(19) 
Cl3 0.1034(16) 0.1228(18) 0.1305(19) 0.0274(15) 0.0739(14) 0.0024(13) 
Cl4 0.1007(14) 0.0961(14) 0.1059(15) 0.0555(12) 0.0340(11) -0.0049(11) 
Cl5 0.0770(15) 0.224(3) 0.1082(18) -0.0110(19) 0.0154(13) 0.0353(17) 
Cl6 0.155(2) 0.1080(17) 0.169(2) 0.0951(18) 0.0629(18) 0.0435(15) 
Cl7 0.0818(16) 0.077(2) 0.079(2) 0.0459(18) -0.0007(14) 0.0166(13) 
Cl7A 0.44(3) 0.116(10) 0.100(9) 0.058(8) 0.108(15) 0.063(14) 
Cl8 0.0817(11) 0.0829(11) 0.0647(10) 0.0324(9) 0.0145(8) -0.0077(9) 
  
_geom_special_details 
; 
 All esds (except the esd in the dihedral angle between two l.s. planes) 
 are estimated using the full covariance matrix.  The cell esds are taken 
 into account individually in the estimation of esds in distances, angles 
 and torsion angles; correlations between esds in cell parameters are only 
 used when they are defined by crystal symmetry.  An approximate (isotropic) 
 treatment of cell esds is used for estimating esds involving l.s. planes. 
; 
  
loop_ 
 _geom_bond_atom_site_label_1 
 _geom_bond_atom_site_label_2 
 _geom_bond_distance 
 _geom_bond_site_symmetry_2 
 _geom_bond_publ_flag 
Fe2 O8 2.042(3) . ? 
Fe2 O2 2.052(2) . ? 
Fe2 O6 2.064(3) . ? 
Fe2 N4 2.122(3) . ? 
Fe2 O4 2.126(3) . ? 
Fe2 Fe1 2.7254(10) . ? 
Fe1 O5 2.066(2) . ? 
Fe1 O3 2.074(3) . ? 
Fe1 O1 2.084(3) . ? 
Fe1 N1 2.138(3) . ? 
Fe1 O7 2.162(3) . ? 
O1 C100 1.258(4) . ? 
O2 C100 1.264(4) . ? 
O3 C95 1.270(4) . ? 
O4 C95 1.245(4) . ? 
O5 C104 1.260(4) . ? 
O6 C104 1.258(4) . ? 
O7 C102 1.248(4) . ? 
O8 C102 1.267(4) . ? 
O9 S1 1.432(3) . ? 
O10 S1 1.422(3) . ? 
O11 S2 1.433(4) . ? 
O12 S2 1.425(4) . ? 
N3 C24 1.413(6) . ? 
N3 C105 1.456(6) . ? 
N3 C110 1.473(6) . ? 
N2 C88 1.466(5) . ? 
N2 C39 1.468(5) . ? 
N2 S1 1.641(3) . ? 
N1 C71 1.472(5) . ? 
N1 C63 1.481(5) . ? 
N6 C14 1.419(7) . ? 
N6 C106 1.436(7) . ? 
N6 C107 1.447(7) . ? 
N5 C41 1.458(5) . ? 
N5 C68 1.462(5) . ? 
N5 S2 1.646(3) . ? 
N4 C61 1.459(5) . ? 
N4 C25 1.482(5) . ? 
S1 C81 1.774(5) . ? 
S2 C53 1.776(5) . ? 
C1 C4 1.377(6) . ? 
C1 C51 1.394(6) . ? 
C2 C37 1.376(7) . ? 
C2 C5 1.379(7) . ? 
C2 C114 1.518(6) . ? 
C3 C24 1.369(6) . ? 
C3 C15 1.396(7) . ? 
C4 C18 1.376(6) . ? 
C5 C16 1.393(7) . ? 
C6 C90 1.350(7) . ? 
C6 C50 1.446(6) . ? 
C7 C34 1.518(6) . ? 
C8 C40 1.374(6) . ? 
C8 C11 1.386(7) . ? 
C9 C109 1.365(7) . ? 
C9 C11 1.366(7) . ? 
C9 C116 1.511(7) . ? 
C10 C17 1.380(6) . ? 
C10 C49 1.387(6) . ? 
C12 C15 1.358(7) . ? 
C12 C72 1.423(6) . ? 
C13 C30 1.382(6) . ? 
C13 C42 1.384(6) . ? 
C13 C115 1.519(6) . ? 
C14 C89 1.381(7) . ? 
C14 C55 1.408(7) . ? 
C16 C84 1.381(6) . ? 
C17 C58 1.399(6) . ? 
C18 C77 1.400(6) . ? 
C19 C45 1.382(6) . ? 
C19 C20 1.384(6) . ? 
C20 C28 1.381(6) . ? 
C21 C70 1.379(6) . ? 
C21 C65 1.388(5) . ? 
C22 C36 1.356(6) . ? 
C22 C26 1.390(6) . ? 
C23 C86 1.503(6) . ? 
C24 C69 1.436(6) . ? 
C25 C68 1.497(5) . ? 
C26 C81 1.378(6) . ? 
C27 C32 1.377(6) . ? 
C27 C58 1.392(6) . ? 
C28 C31 1.385(7) . ? 
C28 C113 1.508(6) . ? 
C29 C31 1.387(6) . ? 
C29 C45 1.396(6) . ? 
C30 C38 1.382(6) . ? 
C32 C49 1.389(6) . ? 
C33 C59 1.384(6) . ? 
C33 C35 1.389(6) . ? 
C34 C54 1.381(6) . ? 
C34 C76 1.382(6) . ? 
C35 C48 1.387(6) . ? 
C35 C108 1.505(6) . ? 
C36 C69 1.421(6) . ? 
C37 C60 1.377(6) . ? 
C38 C92 1.388(5) . ? 
C39 C71 1.515(5) . ? 
C40 C112 1.376(6) . ? 
C40 C77 1.491(6) . ? 
C41 C61 1.517(6) . ? 
C42 C46 1.381(6) . ? 
C43 C48 1.387(6) . ? 
C43 C80 1.390(5) . ? 
C44 C53 1.382(7) . ? 
C44 C94 1.399(7) . ? 
C45 C65 1.493(6) . ? 
C46 C92 1.386(6) . ? 
C47 C54 1.382(6) . ? 
C47 C96 1.395(5) . ? 
C49 C111 1.519(6) . ? 
C50 C55 1.405(7) . ? 
C50 C53 1.418(7) . ? 
C51 C82 1.402(5) . ? 
C51 C58 1.492(6) . ? 
C52 C70 1.380(6) . ? 
C52 C91 1.394(5) . ? 
C55 C93 1.442(6) . ? 
C56 C73 1.381(6) . ? 
C56 C86 1.392(6) . ? 
C57 C62 1.374(6) . ? 
C57 C75 1.375(6) . ? 
C59 C80 1.386(5) . ? 
C60 C84 1.382(5) . ? 
C62 C79 1.390(5) . ? 
C63 C88 1.511(5) . ? 
C64 C74 1.381(6) . ? 
C64 C103 1.397(5) . ? 
C65 C99 1.412(5) . ? 
C66 C87 1.380(5) . ? 
C66 C73 1.402(5) . ? 
C66 C91 1.492(5) . ? 
C67 C96 1.382(5) . ? 
C67 C76 1.384(5) . ? 
C69 C72 1.421(6) . ? 
C72 C81 1.426(6) . ? 
C74 C78 1.380(6) . ? 
C75 C97 1.389(5) . ? 
C77 C82 1.403(6) . ? 
C78 C85 1.390(5) . ? 
C79 C101 1.419(5) . ? 
C79 C84 1.494(5) . ? 
C80 C97 1.495(6) . ? 
C82 C95 1.511(5) . ? 
C83 C87 1.388(5) . ? 
C83 C86 1.393(5) . ? 
C85 C98 1.402(5) . ? 
C85 C92 1.499(6) . ? 
C89 C90 1.397(7) . ? 
C91 C99 1.409(5) . ? 
C93 C94 1.332(7) . ? 
C96 C103 1.495(5) . ? 
C97 C101 1.409(5) . ? 
C98 C103 1.414(5) . ? 
C98 C104 1.511(5) . ? 
C99 C100 1.511(5) . ? 
C101 C102 1.510(5) . ? 
C112 C109 1.383(7) . ? 
C120 Cl1 1.573(9) . ? 
C120 Cl2 1.743(9) . ? 
C120 Cl1A 1.828(9) . ? 
C121 Cl3 1.707(6) . ? 
C121 Cl4 1.736(6) . ? 
C122 Cl7A 1.478(18) . ? 
C122 Cl6 1.710(8) . ? 
C122 Cl7 1.741(7) . ? 
C123 Cl5 1.708(9) . ? 
C123 Cl8 1.723(7) . ? 
  
loop_ 
 _geom_angle_atom_site_label_1 
 _geom_angle_atom_site_label_2 
 _geom_angle_atom_site_label_3 
 _geom_angle 
 _geom_angle_site_symmetry_1 
 _geom_angle_site_symmetry_3 
 _geom_angle_publ_flag 
O8 Fe2 O2 90.15(10) . . ? 
O8 Fe2 O6 89.74(10) . . ? 
O2 Fe2 O6 162.50(10) . . ? 
O8 Fe2 N4 110.86(12) . . ? 
O2 Fe2 N4 100.57(12) . . ? 
O6 Fe2 N4 95.82(12) . . ? 
O8 Fe2 O4 166.62(10) . . ? 
O2 Fe2 O4 88.56(10) . . ? 
O6 Fe2 O4 87.52(10) . . ? 
N4 Fe2 O4 82.45(11) . . ? 
O8 Fe2 Fe1 89.22(8) . . ? 
O2 Fe2 Fe1 82.64(8) . . ? 
O6 Fe2 Fe1 79.85(8) . . ? 
N4 Fe2 Fe1 159.54(9) . . ? 
O4 Fe2 Fe1 77.41(8) . . ? 
O5 Fe1 O3 90.66(10) . . ? 
O5 Fe1 O1 165.81(10) . . ? 
O3 Fe1 O1 89.89(11) . . ? 
O5 Fe1 N1 97.18(11) . . ? 
O3 Fe1 N1 113.17(12) . . ? 
O1 Fe1 N1 95.63(11) . . ? 
O5 Fe1 O7 86.45(10) . . ? 
O3 Fe1 O7 163.05(10) . . ? 
O1 Fe1 O7 88.91(10) . . ? 
N1 Fe1 O7 83.77(11) . . ? 
O5 Fe1 Fe2 83.96(8) . . ? 
O3 Fe1 Fe2 87.18(8) . . ? 
O1 Fe1 Fe2 81.91(8) . . ? 
N1 Fe1 Fe2 159.55(9) . . ? 
O7 Fe1 Fe2 75.91(8) . . ? 
C100 O1 Fe1 122.3(2) . . ? 
C100 O2 Fe2 123.1(2) . . ? 
C95 O3 Fe1 117.7(2) . . ? 
C95 O4 Fe2 127.6(2) . . ? 
C104 O5 Fe1 120.5(2) . . ? 
C104 O6 Fe2 125.5(2) . . ? 
C102 O7 Fe1 127.8(2) . . ? 
C102 O8 Fe2 117.0(2) . . ? 
C24 N3 C105 115.5(4) . . ? 
C24 N3 C110 114.8(4) . . ? 
C105 N3 C110 111.2(4) . . ? 
C88 N2 C39 110.6(3) . . ? 
C88 N2 S1 115.6(3) . . ? 
C39 N2 S1 118.6(3) . . ? 
C71 N1 C63 110.2(3) . . ? 
C71 N1 Fe1 111.8(2) . . ? 
C63 N1 Fe1 110.1(2) . . ? 
C14 N6 C106 117.0(5) . . ? 
C14 N6 C107 112.0(4) . . ? 
C106 N6 C107 110.9(5) . . ? 
C41 N5 C68 110.9(3) . . ? 
C41 N5 S2 119.1(3) . . ? 
C68 N5 S2 114.8(3) . . ? 
C61 N4 C25 109.1(3) . . ? 
C61 N4 Fe2 113.2(2) . . ? 
C25 N4 Fe2 109.6(2) . . ? 
O10 S1 O9 119.1(2) . . ? 
O10 S1 N2 106.87(18) . . ? 
O9 S1 N2 105.65(19) . . ? 
O10 S1 C81 111.5(2) . . ? 
O9 S1 C81 107.3(2) . . ? 
N2 S1 C81 105.49(19) . . ? 
O12 S2 O11 119.1(2) . . ? 
O12 S2 N5 106.2(2) . . ? 
O11 S2 N5 106.4(2) . . ? 
O12 S2 C53 112.2(2) . . ? 
O11 S2 C53 106.9(2) . . ? 
N5 S2 C53 105.2(2) . . ? 
C4 C1 C51 121.6(4) . . ? 
C37 C2 C5 117.3(4) . . ? 
C37 C2 C114 121.9(5) . . ? 
C5 C2 C114 120.8(5) . . ? 
C24 C3 C15 120.9(5) . . ? 
C18 C4 C1 119.6(4) . . ? 
C2 C5 C16 121.3(5) . . ? 
C90 C6 C50 119.5(5) . . ? 
C40 C8 C11 120.6(5) . . ? 
C109 C9 C11 117.3(5) . . ? 
C109 C9 C116 120.9(5) . . ? 
C11 C9 C116 121.8(5) . . ? 
C17 C10 C49 121.6(4) . . ? 
C9 C11 C8 121.6(5) . . ? 
C15 C12 C72 120.6(5) . . ? 
C30 C13 C42 118.2(4) . . ? 
C30 C13 C115 121.2(4) . . ? 
C42 C13 C115 120.6(5) . . ? 
C89 C14 C55 119.4(5) . . ? 
C89 C14 N6 121.9(5) . . ? 
C55 C14 N6 118.7(5) . . ? 
C12 C15 C3 121.6(4) . . ? 
C84 C16 C5 120.7(5) . . ? 
C10 C17 C58 121.0(4) . . ? 
C4 C18 C77 120.9(4) . . ? 
C45 C19 C20 121.2(4) . . ? 
C28 C20 C19 121.9(4) . . ? 
C70 C21 C65 121.8(4) . . ? 
C36 C22 C26 119.6(4) . . ? 
C3 C24 N3 123.2(5) . . ? 
C3 C24 C69 118.6(5) . . ? 
N3 C24 C69 118.2(4) . . ? 
N4 C25 C68 114.0(3) . . ? 
C81 C26 C22 121.4(4) . . ? 
C32 C27 C58 121.1(4) . . ? 
C20 C28 C31 117.0(4) . . ? 
C20 C28 C113 121.7(5) . . ? 
C31 C28 C113 121.3(5) . . ? 
C31 C29 C45 120.8(4) . . ? 
C38 C30 C13 120.6(4) . . ? 
C28 C31 C29 121.7(4) . . ? 
C27 C32 C49 121.8(4) . . ? 
C59 C33 C35 121.0(4) . . ? 
C54 C34 C76 118.1(4) . . ? 
C54 C34 C7 121.2(4) . . ? 
C76 C34 C7 120.7(4) . . ? 
C48 C35 C33 117.6(4) . . ? 
C48 C35 C108 120.6(4) . . ? 
C33 C35 C108 121.7(4) . . ? 
C22 C36 C69 121.6(5) . . ? 
C2 C37 C60 121.9(5) . . ? 
C30 C38 C92 121.5(4) . . ? 
N2 C39 C71 109.2(3) . . ? 
C8 C40 C112 118.2(4) . . ? 
C8 C40 C77 121.8(4) . . ? 
C112 C40 C77 119.8(4) . . ? 
N5 C41 C61 108.8(3) . . ? 
C46 C42 C13 121.2(4) . . ? 
C48 C43 C80 120.7(4) . . ? 
C53 C44 C94 119.8(5) . . ? 
C19 C45 C29 117.4(4) . . ? 
C19 C45 C65 122.0(4) . . ? 
C29 C45 C65 120.4(4) . . ? 
C42 C46 C92 120.9(4) . . ? 
C54 C47 C96 120.7(4) . . ? 
C43 C48 C35 121.4(4) . . ? 
C10 C49 C32 117.2(4) . . ? 
C10 C49 C111 121.0(4) . . ? 
C32 C49 C111 121.8(4) . . ? 
C55 C50 C53 118.5(4) . . ? 
C55 C50 C6 118.3(5) . . ? 
C53 C50 C6 123.1(5) . . ? 
C1 C51 C82 118.7(4) . . ? 
C1 C51 C58 116.2(4) . . ? 
C82 C51 C58 125.1(3) . . ? 
C70 C52 C91 121.3(4) . . ? 
C44 C53 C50 121.0(5) . . ? 
C44 C53 S2 115.0(4) . . ? 
C50 C53 S2 123.6(4) . . ? 
C34 C54 C47 121.4(4) . . ? 
C50 C55 C14 120.5(5) . . ? 
C50 C55 C93 118.5(5) . . ? 
C14 C55 C93 121.1(5) . . ? 
C73 C56 C86 121.8(4) . . ? 
C62 C57 C75 119.2(4) . . ? 
C27 C58 C17 117.3(4) . . ? 
C27 C58 C51 122.4(4) . . ? 
C17 C58 C51 120.1(4) . . ? 
C33 C59 C80 121.3(4) . . ? 
C37 C60 C84 121.0(4) . . ? 
N4 C61 C41 113.0(3) . . ? 
C57 C62 C79 122.2(4) . . ? 
N1 C63 C88 113.3(3) . . ? 
C74 C64 C103 121.9(4) . . ? 
C21 C65 C99 118.7(4) . . ? 
C21 C65 C45 117.1(4) . . ? 
C99 C65 C45 124.1(3) . . ? 
C87 C66 C73 118.3(4) . . ? 
C87 C66 C91 122.0(3) . . ? 
C73 C66 C91 119.6(3) . . ? 
C96 C67 C76 121.5(4) . . ? 
N5 C68 C25 109.1(4) . . ? 
C36 C69 C72 119.0(4) . . ? 
C36 C69 C24 120.4(4) . . ? 
C72 C69 C24 120.4(4) . . ? 
C21 C70 C52 119.3(4) . . ? 
N1 C71 C39 113.3(3) . . ? 
C69 C72 C12 117.6(4) . . ? 
C69 C72 C81 117.7(4) . . ? 
C12 C72 C81 124.6(4) . . ? 
C56 C73 C66 120.4(4) . . ? 
C78 C74 C64 118.6(4) . . ? 
C57 C75 C97 121.4(4) . . ? 
C34 C76 C67 120.8(4) . . ? 
C18 C77 C82 119.1(4) . . ? 
C18 C77 C40 116.5(4) . . ? 
C82 C77 C40 124.1(3) . . ? 
C74 C78 C85 121.9(4) . . ? 
C62 C79 C101 118.4(4) . . ? 
C62 C79 C84 116.9(3) . . ? 
C101 C79 C84 124.6(3) . . ? 
C59 C80 C43 117.9(4) . . ? 
C59 C80 C97 121.1(3) . . ? 
C43 C80 C97 120.6(3) . . ? 
C26 C81 C72 120.4(4) . . ? 
C26 C81 S1 115.3(4) . . ? 
C72 C81 S1 123.9(3) . . ? 
C51 C82 C77 120.1(4) . . ? 
C51 C82 C95 120.2(4) . . ? 
C77 C82 C95 119.6(3) . . ? 
C87 C83 C86 121.6(4) . . ? 
C16 C84 C60 117.8(4) . . ? 
C16 C84 C79 120.2(4) . . ? 
C60 C84 C79 121.8(4) . . ? 
C78 C85 C98 119.3(4) . . ? 
C78 C85 C92 115.5(3) . . ? 
C98 C85 C92 125.2(3) . . ? 
C56 C86 C83 117.1(4) . . ? 
C56 C86 C23 121.8(4) . . ? 
C83 C86 C23 121.1(4) . . ? 
C66 C87 C83 120.8(4) . . ? 
N2 C88 C63 109.8(3) . . ? 
C14 C89 C90 120.4(5) . . ? 
C6 C90 C89 121.8(5) . . ? 
C52 C91 C99 119.0(4) . . ? 
C52 C91 C66 115.7(3) . . ? 
C99 C91 C66 125.2(3) . . ? 
C46 C92 C38 117.6(4) . . ? 
C46 C92 C85 123.1(4) . . ? 
C38 C92 C85 119.0(4) . . ? 
C94 C93 C55 121.3(5) . . ? 
C93 C94 C44 120.9(5) . . ? 
O4 C95 O3 124.9(3) . . ? 
O4 C95 C82 117.0(3) . . ? 
O3 C95 C82 118.1(3) . . ? 
C67 C96 C47 117.6(4) . . ? 
C67 C96 C103 121.8(3) . . ? 
C47 C96 C103 120.4(3) . . ? 
C75 C97 C101 119.4(4) . . ? 
C75 C97 C80 116.3(3) . . ? 
C101 C97 C80 124.2(3) . . ? 
C85 C98 C103 119.5(3) . . ? 
C85 C98 C104 120.7(3) . . ? 
C103 C98 C104 119.8(3) . . ? 
C91 C99 C65 119.9(3) . . ? 
C91 C99 C100 120.5(3) . . ? 
C65 C99 C100 119.6(3) . . ? 
O1 C100 O2 125.0(3) . . ? 
O1 C100 C99 118.7(3) . . ? 
O2 C100 C99 116.2(3) . . ? 
C97 C101 C79 119.4(3) . . ? 
C97 C101 C102 120.9(3) . . ? 
C79 C101 C102 119.7(3) . . ? 
O7 C102 O8 125.5(3) . . ? 
O7 C102 C101 117.9(3) . . ? 
O8 C102 C101 116.6(3) . . ? 
C64 C103 C98 118.7(3) . . ? 
C64 C103 C96 115.5(3) . . ? 
C98 C103 C96 125.5(3) . . ? 
O6 C104 O5 124.1(3) . . ? 
O6 C104 C98 117.7(3) . . ? 
O5 C104 C98 118.2(3) . . ? 
C40 C112 C109 120.2(5) . . ? 
C9 C109 C112 122.2(5) . . ? 
Cl1 C120 Cl2 109.9(5) . . ? 
Cl1 C120 Cl1A 37.2(3) . . ? 
Cl2 C120 Cl1A 106.7(4) . . ? 
Cl3 C121 Cl4 112.9(4) . . ? 
Cl7A C122 Cl6 118.7(10) . . ? 
Cl7A C122 Cl7 25.8(8) . . ? 
Cl6 C122 Cl7 112.2(4) . . ? 
Cl5 C123 Cl8 113.8(5) . . ? 
  
_diffrn_measured_fraction_theta_max    0.892 
_diffrn_reflns_theta_full              28.31 
_diffrn_measured_fraction_theta_full   0.892 
_refine_diff_density_max    0.811 
_refine_diff_density_min   -0.744 
_refine_diff_density_rms    0.083 


#===END

  
data_Compound2 
  
_audit_creation_method            SHELXL-97 
_chemical_name_systematic 
; 
 ? 
; 
_chemical_name_common             ? 
_chemical_melting_point           ? 
_chemical_formula_moiety          ? 
_chemical_formula_sum 
 'C120 H112 Cl8 Co2 N6 O12 S2' 
_chemical_formula_weight          2295.74 
  
loop_ 
 _atom_type_symbol 
 _atom_type_description 
 _atom_type_scat_dispersion_real 
 _atom_type_scat_dispersion_imag 
 _atom_type_scat_source 
 'C'  'C'   0.0033   0.0016 
 'International Tables Vol C Tables 4.2.6.8 and 6.1.1.4' 
 'H'  'H'   0.0000   0.0000 
 'International Tables Vol C Tables 4.2.6.8 and 6.1.1.4' 
 'N'  'N'   0.0061   0.0033 
 'International Tables Vol C Tables 4.2.6.8 and 6.1.1.4' 
 'O'  'O'   0.0106   0.0060 
 'International Tables Vol C Tables 4.2.6.8 and 6.1.1.4' 
 'S'  'S'   0.1246   0.1234 
 'International Tables Vol C Tables 4.2.6.8 and 6.1.1.4' 
 'Cl'  'Cl'   0.1484   0.1585 
 'International Tables Vol C Tables 4.2.6.8 and 6.1.1.4' 
 'Co'  'Co'   0.3494   0.9721 
 'International Tables Vol C Tables 4.2.6.8 and 6.1.1.4' 
  
_symmetry_cell_setting            Triclinic 
_symmetry_space_group_name_H-M    P-1 
  
loop_ 
 _symmetry_equiv_pos_as_xyz 
 'x, y, z' 
 '-x, -y, -z' 
  
_cell_length_a                    15.191(7) 
_cell_length_b                    19.660(9) 
_cell_length_c                    21.298(13) 
_cell_angle_alpha                 115.974(7) 
_cell_angle_beta                  105.369(11) 
_cell_angle_gamma                 90.353(8) 
_cell_volume                      5459(5) 
_cell_formula_units_Z             2 
_cell_measurement_temperature     173(2) 
_cell_measurement_reflns_used     1019 
_cell_measurement_theta_min       2.23 
_cell_measurement_theta_max       27.17 
  
_exptl_crystal_description        plate 
_exptl_crystal_colour             blue 
_exptl_crystal_size_max           0.40 
_exptl_crystal_size_mid           0.35 
_exptl_crystal_size_min           0.10 
_exptl_crystal_density_meas       0 
_exptl_crystal_density_diffrn     1.397 
_exptl_crystal_density_method     'not measured' 
_exptl_crystal_F_000              2384 
_exptl_absorpt_coefficient_mu     0.603 
_exptl_absorpt_correction_type    'sadabs' 
_exptl_absorpt_correction_T_min   0.798317 
_exptl_absorpt_correction_T_max   1.000000 
_exptl_absorpt_process_details    ? 
  
_exptl_special_details 
; 
 ? 
; 
  
_diffrn_ambient_temperature       173(2) 
_diffrn_radiation_wavelength      0.71073 
_diffrn_radiation_type            MoK\a 
_diffrn_radiation_source          'fine-focus sealed tube' 
_diffrn_radiation_monochromator   graphite 
_diffrn_measurement_device_type   'CCD area detector' 
_diffrn_measurement_method        'phi and omega scans' 
_diffrn_detector_area_resol_mean  ? 
_diffrn_standards_number          ? 
_diffrn_standards_interval_count  ? 
_diffrn_standards_interval_time   ? 
_diffrn_standards_decay_%         ? 
_diffrn_reflns_number             48323 
_diffrn_reflns_av_R_equivalents   0.0419 
_diffrn_reflns_av_sigmaI/netI     0.0693 
_diffrn_reflns_limit_h_min        -20 
_diffrn_reflns_limit_h_max        19 
_diffrn_reflns_limit_k_min        -26 
_diffrn_reflns_limit_k_max        25 
_diffrn_reflns_limit_l_min        -29 
_diffrn_reflns_limit_l_max        28 
_diffrn_reflns_theta_min          1.11 
_diffrn_reflns_theta_max          28.96 
_reflns_number_total              24669 
_reflns_number_gt                 16706 
_reflns_threshold_expression      >2sigma(I) 
  
_computing_data_collection        'Bruker SMART' 
_computing_cell_refinement        'Bruker SMART' 
_computing_data_reduction         'Bruker SAINT' 
_computing_structure_solution     'SHELXS-97 (Sheldrick, 1990)' 
_computing_structure_refinement   'SHELXL-97 (Sheldrick, 1997)' 
_computing_molecular_graphics     'Bruker SHELXTL' 
_computing_publication_material   'Bruker SHELXTL' 
  
_refine_special_details 
; 
 Refinement of F^2^ against ALL reflections.  The weighted R-factor wR and 
 goodness of fit S are based on F^2^, conventional R-factors R are based 
 on F, with F set to zero for negative F^2^. The threshold expression of 
 F^2^ > 2sigma(F^2^) is used only for calculating R-factors(gt) etc. and is 
 not relevant to the choice of reflections for refinement.  R-factors based 
 on F^2^ are statistically about twice as large as those based on F, and R- 
 factors based on ALL data will be even larger. 
; 
  
_refine_ls_structure_factor_coef  Fsqd 
_refine_ls_matrix_type            full 
_refine_ls_weighting_scheme       calc 
_refine_ls_weighting_details 
 'calc w=1/[\s^2^(Fo^2^)+(0.1026P)^2^+4.1504P] where P=(Fo^2^+2Fc^2^)/3' 
_atom_sites_solution_primary      direct 
_atom_sites_solution_secondary    difmap 
_atom_sites_solution_hydrogens    geom 
_refine_ls_hydrogen_treatment     mixed 
_refine_ls_extinction_method      SHELXL 
_refine_ls_extinction_coef        0.00000(19) 
_refine_ls_extinction_expression 
 'Fc^*^=kFc[1+0.001xFc^2^\l^3^/sin(2\q)]^-1/4^' 
_refine_ls_number_reflns          24669 
_refine_ls_number_parameters      1409 
_refine_ls_number_restraints      5 
_refine_ls_R_factor_all           0.1055 
_refine_ls_R_factor_gt            0.0696 
_refine_ls_wR_factor_ref          0.2017 
_refine_ls_wR_factor_gt           0.1791 
_refine_ls_goodness_of_fit_ref    1.040 
_refine_ls_restrained_S_all       1.044 
_refine_ls_shift/su_max           9.316 
_refine_ls_shift/su_mean          0.045 
  
loop_ 
 _atom_site_label 
 _atom_site_type_symbol 
 _atom_site_fract_x 
 _atom_site_fract_y 
 _atom_site_fract_z 
 _atom_site_U_iso_or_equiv 
 _atom_site_adp_type 
 _atom_site_occupancy 
 _atom_site_symmetry_multiplicity 
 _atom_site_calc_flag 
 _atom_site_refinement_flags 
 _atom_site_disorder_assembly 
 _atom_site_disorder_group 
C1 C 0.2218(2) 0.07744(19) 0.06342(18) 0.0245(7) Uani 1 1 d . . . 
C2 C 0.4117(2) 0.25560(19) 0.04504(18) 0.0232(6) Uani 1 1 d . . . 
C3 C 0.0561(2) 0.23471(18) -0.03550(17) 0.0217(6) Uani 1 1 d . . . 
C4 C 0.2236(2) 0.14222(19) 0.04568(17) 0.0227(6) Uani 1 1 d . . . 
C5 C 0.5159(2) 0.2599(2) 0.06930(18) 0.0264(7) Uani 1 1 d . . . 
C6 C -0.0942(2) 0.25129(19) -0.00210(18) 0.0253(7) Uani 1 1 d . . . 
C7 C 0.1783(2) 0.00120(19) 0.00845(19) 0.0269(7) Uani 1 1 d . . . 
C8 C -0.0481(2) 0.23198(18) -0.05589(18) 0.0233(6) Uani 1 1 d . . . 
C9 C 0.2462(2) 0.3534(2) -0.03068(19) 0.0274(7) Uani 1 1 d . . . 
C10 C 0.1488(2) 0.0798(2) -0.22220(19) 0.0335(8) Uani 1 1 d . . . 
H10A H 0.1456 0.1250 -0.2314 0.040 Uiso 1 1 calc R . . 
H10B H 0.0924 0.0720 -0.2098 0.040 Uiso 1 1 calc R . . 
C11 C 0.4249(3) -0.0406(2) -0.12628(19) 0.0324(8) Uani 1 1 d . . . 
C12 C 0.1255(2) -0.02007(19) -0.06816(19) 0.0282(7) Uani 1 1 d . . . 
C13 C -0.0609(2) 0.1898(2) -0.19018(19) 0.0313(8) Uani 1 1 d . . . 
C14 C 0.4339(2) 0.0789(2) -0.01391(18) 0.0269(7) Uani 1 1 d . . . 
H14 H 0.4100 0.1058 0.0259 0.032 Uiso 1 1 calc R . . 
C15 C 0.3939(2) 0.0037(2) -0.0657(2) 0.0313(8) Uani 1 1 d . . . 
H15 H 0.3431 -0.0185 -0.0596 0.038 Uiso 1 1 calc R . . 
C16 C -0.0997(2) 0.2115(2) -0.12747(19) 0.0280(7) Uani 1 1 d . . . 
C17 C 0.2572(2) 0.4219(2) -0.0432(2) 0.0336(8) Uani 1 1 d . . . 
C18 C 0.5577(2) 0.1930(2) 0.03781(19) 0.0289(7) Uani 1 1 d . . . 
C19 C 0.0367(2) 0.2254(2) 0.1581(2) 0.0333(8) Uani 1 1 d . . . 
H19 H 0.0729 0.1898 0.1677 0.040 Uiso 1 1 calc R . . 
C20 C -0.1947(2) 0.2124(2) -0.1444(2) 0.0348(8) Uani 1 1 d . . . 
H20 H -0.2294 0.1987 -0.1935 0.042 Uiso 1 1 calc R . . 
C21 C -0.0503(2) 0.2666(2) 0.07409(19) 0.0271(7) Uani 1 1 d . . . 
C22 C 0.5402(2) 0.0704(2) -0.0802(2) 0.0340(8) Uani 1 1 d . . . 
H22 H 0.5912 0.0925 -0.0862 0.041 Uiso 1 1 calc R . . 
C23 C 0.1632(3) 0.4707(2) 0.2631(2) 0.0387(9) Uani 1 1 d . . . 
H23A H 0.1645 0.5166 0.2551 0.046 Uiso 1 1 calc R . . 
H23B H 0.1072 0.4660 0.2770 0.046 Uiso 1 1 calc R . . 
C24 C 0.2632(2) 0.0915(2) 0.13517(19) 0.0285(7) Uani 1 1 d . . . 
C25 C 0.3157(2) 0.0995(2) -0.17783(18) 0.0329(8) Uani 1 1 d . . . 
H25A H 0.3684 0.1030 -0.1370 0.040 Uiso 1 1 calc R . . 
H25B H 0.3231 0.1466 -0.1832 0.040 Uiso 1 1 calc R . . 
C26 C 0.3275(3) 0.4117(2) 0.23176(19) 0.0392(9) Uani 1 1 d . . . 
H26A H 0.3835 0.4165 0.2177 0.047 Uiso 1 1 calc R . . 
H26B H 0.3284 0.3669 0.2416 0.047 Uiso 1 1 calc R . . 
C27 C 0.3175(3) 0.0294(2) -0.24933(19) 0.0379(9) Uani 1 1 d . . . 
H27A H 0.3740 0.0368 -0.2618 0.045 Uiso 1 1 calc R . . 
H27B H 0.3182 -0.0172 -0.2424 0.045 Uiso 1 1 calc R . . 
C28 C 0.3172(3) 0.1673(2) 0.19682(19) 0.0301(7) Uani 1 1 d . . . 
C29 C 0.1866(3) -0.1833(2) -0.41395(19) 0.0382(9) Uani 1 1 d . . . 
C30 C -0.2396(2) 0.2329(2) -0.0917(2) 0.0356(8) Uani 1 1 d . . . 
H30 H -0.3043 0.2338 -0.1042 0.043 Uiso 1 1 calc R . . 
C31 C 0.1786(2) -0.0577(2) 0.0264(2) 0.0334(8) Uani 1 1 d . . . 
H31 H 0.1516 -0.1080 -0.0100 0.040 Uiso 1 1 calc R . . 
C32 C 0.5083(2) 0.1142(2) -0.02041(18) 0.0272(7) Uani 1 1 d . . . 
C33 C 0.0039(2) 0.2157(2) 0.08820(19) 0.0288(7) Uani 1 1 d . . . 
H33 H 0.0182 0.1741 0.0494 0.035 Uiso 1 1 calc R . . 
C34 C 0.3301(3) 0.4847(3) 0.3028(2) 0.0423(10) Uani 1 1 d . . . 
H34A H 0.3844 0.4899 0.3433 0.051 Uiso 1 1 calc R . . 
H34B H 0.3348 0.5306 0.2951 0.051 Uiso 1 1 calc R . . 
C35 C 0.2596(3) -0.1275(2) -0.40006(18) 0.0360(9) Uani 1 1 d . . . 
C36 C 0.7061(2) 0.2665(2) 0.1216(2) 0.0384(9) Uani 1 1 d . . . 
H36 H 0.7707 0.2683 0.1405 0.046 Uiso 1 1 calc R . . 
C37 C 0.2118(3) -0.2496(2) -0.40627(19) 0.0389(9) Uani 1 1 d . . . 
C38 C 0.0250(3) 0.2221(2) -0.2532(2) 0.0417(9) Uani 1 1 d . . . 
H38 H 0.0661 0.2579 -0.2542 0.050 Uiso 1 1 calc R . . 
C39 C 0.1451(2) -0.0808(2) -0.1277(2) 0.0333(8) Uani 1 1 d . . . 
H39 H 0.1966 -0.1058 -0.1183 0.040 Uiso 1 1 calc R . . 
C40 C 0.5703(2) 0.3311(2) 0.12592(19) 0.0306(8) Uani 1 1 d . . . 
C41 C -0.1898(2) 0.2519(2) -0.0213(2) 0.0309(8) Uani 1 1 d . . . 
H41 H -0.2204 0.2658 0.0152 0.037 Uiso 1 1 calc R . . 
C42 C 0.0175(3) 0.2879(2) 0.2166(2) 0.0359(8) Uani 1 1 d . . . 
C43 C -0.0700(2) 0.3289(2) 0.1331(2) 0.0314(8) Uani 1 1 d . . . 
H43 H -0.1070 0.3640 0.1234 0.038 Uiso 1 1 calc R . . 
C44 C -0.0369(3) 0.3393(2) 0.2031(2) 0.0365(9) Uani 1 1 d . . . 
H44 H -0.0507 0.3810 0.2420 0.044 Uiso 1 1 calc R . . 
C45 C 0.5336(2) 0.4072(2) 0.1579(2) 0.0326(8) Uani 1 1 d . . . 
C46 C 0.2593(3) 0.0306(2) 0.1509(2) 0.0368(8) Uani 1 1 d . . . 
H46 H 0.2853 0.0391 0.2000 0.044 Uiso 1 1 calc R . . 
C47 C -0.0007(3) 0.2415(2) -0.1908(2) 0.0344(8) Uani 1 1 d . . . 
H47 H 0.0227 0.2896 -0.1491 0.041 Uiso 1 1 calc R . . 
C48 C 0.3077(3) 0.6794(3) 0.42520(19) 0.0409(10) Uani 1 1 d . . . 
C49 C 0.1618(2) 0.3988(2) 0.1923(2) 0.0366(9) Uani 1 1 d . . . 
H49A H 0.1533 0.3530 0.1994 0.044 Uiso 1 1 calc R . . 
H49B H 0.1083 0.3954 0.1520 0.044 Uiso 1 1 calc R . . 
C50 C 0.3097(3) 0.4193(3) -0.0880(2) 0.0420(10) Uani 1 1 d . . . 
C51 C 0.1508(2) 0.0088(2) -0.29293(19) 0.0340(8) Uani 1 1 d . . . 
H51A H 0.1484 -0.0378 -0.2861 0.041 Uiso 1 1 calc R . . 
H51B H 0.0969 0.0024 -0.3342 0.041 Uiso 1 1 calc R . . 
C52 C -0.0049(3) -0.0096(2) -0.1534(2) 0.0391(9) Uani 1 1 d . . . 
H52 H -0.0573 0.0146 -0.1627 0.047 Uiso 1 1 calc R . . 
C53 C 0.0466(3) 0.5331(2) 0.1326(2) 0.0457(10) Uani 1 1 d . . . 
C54 C 0.4995(3) -0.0055(2) -0.1321(2) 0.0383(9) Uani 1 1 d . . . 
H54 H 0.5239 -0.0327 -0.1715 0.046 Uiso 1 1 calc R . . 
C55 C 0.3057(3) -0.2610(3) -0.3922(2) 0.0417(9) Uani 1 1 d . . . 
H55 H 0.3219 -0.3064 -0.3895 0.050 Uiso 1 1 calc R . . 
C56 C 0.1636(3) 0.5020(2) 0.0440(2) 0.0390(9) Uani 1 1 d . . . 
C57 C 0.2181(3) -0.0433(2) 0.0970(2) 0.0393(9) Uani 1 1 d . . . 
H57 H 0.2179 -0.0838 0.1099 0.047 Uiso 1 1 calc R . . 
C58 C -0.0938(3) 0.1175(2) -0.2530(2) 0.0405(9) Uani 1 1 d . . . 
H58 H -0.1353 0.0818 -0.2522 0.049 Uiso 1 1 calc R . . 
C59 C 0.1428(3) 0.6441(3) 0.3969(2) 0.0478(11) Uani 1 1 d . . . 
H59 H 0.0928 0.6087 0.3883 0.057 Uiso 1 1 calc R . . 
C60 C 0.2209(3) 0.4908(2) -0.0055(2) 0.0388(9) Uani 1 1 d . . . 
C61 C 0.0489(3) 0.0148(2) -0.0825(2) 0.0363(8) Uani 1 1 d . . . 
H61 H 0.0338 0.0554 -0.0435 0.044 Uiso 1 1 calc R . . 
C62 C 0.6649(2) 0.3327(2) 0.1511(2) 0.0370(9) Uani 1 1 d . . . 
H62 H 0.7021 0.3789 0.1886 0.044 Uiso 1 1 calc R . . 
C63 C 0.2886(3) 0.7475(3) 0.4202(2) 0.0452(10) Uani 1 1 d . . . 
C64 C 0.3500(3) -0.1402(3) -0.3845(2) 0.0419(9) Uani 1 1 d . . . 
H64 H 0.3977 -0.1024 -0.3751 0.050 Uiso 1 1 calc R . . 
C65 C 0.3957(3) 0.2000(2) 0.1946(2) 0.0345(8) Uani 1 1 d . . . 
H65 H 0.4137 0.1773 0.1512 0.041 Uiso 1 1 calc R . . 
C66 C 0.5649(3) 0.4591(2) 0.2329(2) 0.0427(10) Uani 1 1 d . . . 
H66 H 0.6072 0.4446 0.2650 0.051 Uiso 1 1 calc R . . 
C67 C 0.0153(3) -0.0695(2) -0.2127(2) 0.0367(8) Uani 1 1 d . . . 
C68 C 0.0921(3) -0.1046(2) -0.1985(2) 0.0386(9) Uani 1 1 d . . . 
H68 H 0.1077 -0.1447 -0.2375 0.046 Uiso 1 1 calc R . . 
C69 C 0.4501(3) 0.2655(2) 0.2542(2) 0.0417(9) Uani 1 1 d . . . 
H69 H 0.5041 0.2856 0.2500 0.050 Uiso 1 1 calc R . . 
C70 C 0.4727(3) 0.4311(2) 0.1146(2) 0.0349(8) Uani 1 1 d . . . 
H70 H 0.4495 0.3985 0.0635 0.042 Uiso 1 1 calc R . . 
C71 C 0.2315(3) 0.6278(3) 0.4123(2) 0.0423(10) Uani 1 1 d . . . 
C72 C 0.4749(3) 0.5552(2) 0.2184(3) 0.0460(10) Uani 1 1 d . . . 
C73 C 0.3727(3) -0.2084(3) -0.3825(2) 0.0422(10) Uani 1 1 d . . . 
H73 H 0.4350 -0.2178 -0.3743 0.051 Uiso 1 1 calc R . . 
C74 C 0.0914(3) -0.1795(3) -0.4386(2) 0.0436(10) Uani 1 1 d . . . 
H74 H 0.0719 -0.1363 -0.4444 0.052 Uiso 1 1 calc R . . 
C75 C 0.6531(2) 0.1979(2) 0.0649(2) 0.0348(8) Uani 1 1 d . . . 
H75 H 0.6825 0.1543 0.0446 0.042 Uiso 1 1 calc R . . 
C76 C 0.0881(3) 0.4483(2) 0.0231(2) 0.0360(8) Uani 1 1 d . . . 
H76 H 0.0759 0.4017 -0.0207 0.043 Uiso 1 1 calc R . . 
C77 C 0.4438(3) 0.5032(2) 0.1445(2) 0.0425(9) Uani 1 1 d . . . 
H77 H 0.4006 0.5172 0.1124 0.051 Uiso 1 1 calc R . . 
C78 C 0.5359(3) 0.5323(3) 0.2627(2) 0.0476(10) Uani 1 1 d . . . 
H78 H 0.5591 0.5654 0.3137 0.057 Uiso 1 1 calc R . . 
C79 C 0.0313(3) 0.4637(2) 0.0668(2) 0.0404(9) Uani 1 1 d . . . 
H79 H -0.0200 0.4268 0.0526 0.048 Uiso 1 1 calc R . . 
C80 C 0.3808(3) -0.1221(2) -0.1822(2) 0.0445(10) Uani 1 1 d . . . 
H80A H 0.4056 -0.1387 -0.2238 0.067 Uiso 1 1 calc R . . 
H80B H 0.3139 -0.1237 -0.1993 0.067 Uiso 1 1 calc R . . 
H80C H 0.3945 -0.1562 -0.1595 0.067 Uiso 1 1 calc R . . 
C81 C -0.0671(3) 0.0982(3) -0.3147(2) 0.0453(10) Uani 1 1 d . . . 
H81 H -0.0893 0.0496 -0.3559 0.054 Uiso 1 1 calc R . . 
C82 C -0.0080(3) 0.1499(3) -0.3163(2) 0.0438(10) Uani 1 1 d . . . 
C83 C 0.0512(3) -0.2999(3) -0.4418(2) 0.0497(11) Uani 1 1 d . . . 
H83 H 0.0042 -0.3382 -0.4512 0.060 Uiso 1 1 calc R . . 
C84 C 0.1419(3) -0.3064(3) -0.4165(2) 0.0446(10) Uani 1 1 d . . . 
C85 C 0.4281(3) 0.3025(2) 0.3196(2) 0.0468(11) Uani 1 1 d . . . 
C86 C 0.1802(3) 0.5711(2) 0.1109(3) 0.0484(10) Uani 1 1 d . . . 
H86 H 0.2322 0.6077 0.1258 0.058 Uiso 1 1 calc R . . 
C87 C 0.3619(3) 0.8007(3) 0.4312(2) 0.0516(12) Uani 1 1 d . . . 
C88 C -0.0444(3) -0.0964(3) -0.2894(2) 0.0500(11) Uani 1 1 d . . . 
H88A H -0.0329 -0.0594 -0.3067 0.075 Uiso 1 1 calc R . . 
H88B H -0.1093 -0.1010 -0.2910 0.075 Uiso 1 1 calc R . . 
H88C H -0.0302 -0.1462 -0.3208 0.075 Uiso 1 1 calc R . . 
C89 C 0.3559(3) 0.3517(3) -0.1263(2) 0.0424(10) Uani 1 1 d . . . 
C90 C 0.4021(3) 0.6691(3) 0.4469(2) 0.0508(11) Uani 1 1 d . . . 
H90 H 0.4174 0.6240 0.4509 0.061 Uiso 1 1 calc R . . 
C91 C 0.0276(3) -0.2381(3) -0.4538(2) 0.0480(11) Uani 1 1 d . . . 
H91 H -0.0357 -0.2362 -0.4736 0.058 Uiso 1 1 calc R . . 
C92 C 0.2949(3) 0.2039(3) 0.2624(2) 0.0475(10) Uani 1 1 d . . . 
H92 H 0.2414 0.1834 0.2669 0.057 Uiso 1 1 calc R . . 
C93 C 0.4431(4) 0.6346(3) 0.2510(3) 0.0658(14) Uani 1 1 d . . . 
H93A H 0.3903 0.6309 0.2682 0.099 Uiso 1 1 calc R . . 
H93B H 0.4251 0.6520 0.2134 0.099 Uiso 1 1 calc R . . 
H93C H 0.4938 0.6711 0.2922 0.099 Uiso 1 1 calc R . . 
C94 C 0.0220(4) 0.1288(3) -0.3834(2) 0.0606(14) Uani 1 1 d . . . 
H94A H 0.0659 0.0920 -0.3862 0.091 Uiso 1 1 calc R . . 
H94B H 0.0516 0.1747 -0.3809 0.091 Uiso 1 1 calc R . . 
H94C H -0.0319 0.1058 -0.4270 0.091 Uiso 1 1 calc R . . 
C95 C 0.3255(3) 0.4860(3) -0.0946(3) 0.0568(13) Uani 1 1 d . . . 
H95 H 0.3617 0.4860 -0.1248 0.068 Uiso 1 1 calc R . . 
C96 C 0.0569(3) 0.3006(3) 0.2941(2) 0.0536(12) Uani 1 1 d . . . 
H96A H 0.0804 0.3549 0.3261 0.080 Uiso 1 1 calc R . . 
H96B H 0.1074 0.2702 0.2969 0.080 Uiso 1 1 calc R . . 
H96C H 0.0087 0.2849 0.3098 0.080 Uiso 1 1 calc R . . 
C97 C 0.1954(3) 0.7631(3) 0.4047(2) 0.0489(11) Uani 1 1 d . . . 
H97 H 0.1827 0.8092 0.4020 0.059 Uiso 1 1 calc R . . 
C98 C 0.1258(3) 0.7127(3) 0.3939(2) 0.0509(11) Uani 1 1 d . . . 
H98 H 0.0643 0.7238 0.3842 0.061 Uiso 1 1 calc R . . 
C99 C 0.1031(4) -0.4352(3) -0.4346(3) 0.0625(13) Uani 1 1 d . . . 
H99A H 0.0523 -0.4239 -0.4129 0.094 Uiso 1 1 calc R . . 
H99B H 0.1328 -0.4757 -0.4260 0.094 Uiso 1 1 calc R . . 
H99C H 0.0790 -0.4521 -0.4874 0.094 Uiso 1 1 calc R . . 
C100 C 0.3497(4) 0.2706(3) 0.3220(2) 0.0558(12) Uani 1 1 d . . . 
H100 H 0.3315 0.2941 0.3653 0.067 Uiso 1 1 calc R . . 
C101 C 0.1231(3) 0.5857(3) 0.1537(3) 0.0514(11) Uani 1 1 d . . . 
H101 H 0.1357 0.6319 0.1979 0.062 Uiso 1 1 calc R . . 
C102 C 0.2894(3) 0.5526(3) -0.0579(3) 0.0604(14) Uani 1 1 d . . . 
H102 H 0.3017 0.5967 -0.0636 0.073 Uiso 1 1 calc R . . 
C103 C 0.4090(4) 0.9329(3) 0.4585(3) 0.0781(17) Uani 1 1 d . . . 
H10C H 0.4310 0.9462 0.5106 0.117 Uiso 1 1 calc R . . 
H10D H 0.3822 0.9757 0.4526 0.117 Uiso 1 1 calc R . . 
H10E H 0.4608 0.9220 0.4379 0.117 Uiso 1 1 calc R . . 
C104 C 0.4697(3) 0.7240(3) 0.4617(2) 0.0587(13) Uani 1 1 d . . . 
H104 H 0.5322 0.7179 0.4786 0.070 Uiso 1 1 calc R . . 
C105 C 0.4871(4) 0.3749(3) 0.3852(3) 0.0671(15) Uani 1 1 d . . . 
H10F H 0.4470 0.4130 0.4038 0.101 Uiso 1 1 calc R . . 
H10G H 0.5313 0.3958 0.3698 0.101 Uiso 1 1 calc R . . 
H10H H 0.5204 0.3622 0.4239 0.101 Uiso 1 1 calc R . . 
C106 C 0.3015(4) 0.8424(4) 0.3430(3) 0.0777(17) Uani 1 1 d . . . 
H10I H 0.3503 0.8271 0.3194 0.117 Uiso 1 1 calc R . . 
H10J H 0.2765 0.8853 0.3360 0.117 Uiso 1 1 calc R . . 
H10K H 0.2522 0.7992 0.3212 0.117 Uiso 1 1 calc R . . 
C107 C 0.4457(4) 0.3506(4) -0.0936(3) 0.0778(19) Uani 1 1 d . . . 
H107 H 0.4757 0.3897 -0.0457 0.093 Uiso 1 1 calc R . . 
C108 C 0.4509(3) 0.7887(3) 0.4531(2) 0.0564(12) Uani 1 1 d . . . 
H108 H 0.5003 0.8250 0.4625 0.068 Uiso 1 1 calc R . . 
C109 C 0.2144(4) -0.3404(3) -0.3238(3) 0.0669(14) Uani 1 1 d . . . 
H10L H 0.2575 -0.2936 -0.3040 0.100 Uiso 1 1 calc R . . 
H10M H 0.2481 -0.3801 -0.3167 0.100 Uiso 1 1 calc R . . 
H10N H 0.1674 -0.3301 -0.2982 0.100 Uiso 1 1 calc R . . 
C110 C 0.3164(4) 0.2935(3) -0.1951(3) 0.0628(13) Uani 1 1 d . . . 
H110 H 0.2536 0.2921 -0.2194 0.075 Uiso 1 1 calc R . . 
C111 C 0.2374(3) 0.5552(3) -0.0143(3) 0.0526(11) Uani 1 1 d . . . 
H111 H 0.2125 0.6004 0.0098 0.063 Uiso 1 1 calc R . . 
C112 C -0.0190(4) 0.5507(3) 0.1786(3) 0.0590(13) Uani 1 1 d . . . 
H11A H 0.0034 0.6007 0.2215 0.089 Uiso 1 1 calc R . . 
H11B H -0.0221 0.5113 0.1947 0.089 Uiso 1 1 calc R . . 
H11C H -0.0805 0.5514 0.1495 0.089 Uiso 1 1 calc R . . 
C113 C 0.3657(4) 0.2355(3) -0.2313(3) 0.0703(15) Uani 1 1 d . . . 
H113 H 0.3357 0.1972 -0.2797 0.084 Uiso 1 1 calc R . . 
C114 C 0.4549(4) 0.2333(3) -0.1987(3) 0.0662(15) Uani 1 1 d . . . 
C115 C 0.5085(5) 0.1688(4) -0.2368(4) 0.102(2) Uani 1 1 d . . . 
H11D H 0.4717 0.1371 -0.2878 0.152 Uiso 1 1 calc R . . 
H11E H 0.5206 0.1371 -0.2113 0.152 Uiso 1 1 calc R . . 
H11F H 0.5671 0.1912 -0.2355 0.152 Uiso 1 1 calc R . . 
C116 C 0.4949(4) 0.2931(4) -0.1291(4) 0.092(2) Uani 1 1 d . . . 
C117 C 0.2370(5) 0.1093(6) 0.5392(6) 0.122(4) Uani 0.80 1 d PD . . 
C118 C 0.6028(5) 0.9017(4) 0.6432(3) 0.099(2) Uani 1 1 d . . . 
H11G H 0.6024 0.8718 0.6703 0.118 Uiso 1 1 calc R . . 
H11H H 0.5536 0.8758 0.5959 0.118 Uiso 1 1 calc R . . 
C119 C 0.2099(5) 0.4073(4) 0.7024(5) 0.121(3) Uani 1 1 d D . . 
C120 C 0.2545(6) 0.4055(4) 0.4894(4) 0.120(3) Uani 1 1 d D . . 
Cl1 Cl 0.7052(2) 0.9020(2) 0.62687(17) 0.1607(12) Uani 1 1 d . . . 
Cl2 Cl 0.57792(15) 0.99413(13) 0.69375(13) 0.1120(6) Uani 1 1 d . . . 
Cl3 Cl 0.1410(2) 0.31513(18) 0.65141(18) 0.0953(9) Uani 0.75 1 d P . . 
Cl4 Cl 0.14164(12) 0.11465(11) 0.47928(9) 0.0902(5) Uani 1 1 d . . . 
Cl5 Cl 0.1517(3) 0.4810(2) 0.7024(2) 0.1091(12) Uani 0.75 1 d P . . 
Cl6 Cl 0.3284(4) 0.4550(3) 0.5695(2) 0.1392(18) Uani 0.60 1 d P . . 
Cl7 Cl 0.2229(4) 0.3071(3) 0.4646(3) 0.1186(16) Uani 0.60 1 d PD . . 
Cl8 Cl 0.3342(5) 0.1714(5) 0.5663(6) 0.134(3) Uani 0.50 1 d PD . . 
Cl3A Cl 0.1815(14) 0.3211(6) 0.6348(6) 0.167(7) Uani 0.25 1 d PD . . 
Cl5A Cl 0.135(2) 0.4568(10) 0.6694(10) 0.259(14) Uani 0.25 1 d P . . 
Cl6A Cl 0.3802(4) 0.4271(4) 0.5428(3) 0.1058(18) Uani 0.40 1 d P . . 
Cl7A Cl 0.2000(8) 0.3328(8) 0.4873(8) 0.236(8) Uani 0.40 1 d PD . . 
Cl8A Cl 0.3147(8) 0.1913(8) 0.5790(10) 0.156(6) Uani 0.30 1 d PD . . 
Co1 Co 0.23820(3) 0.29747(2) 0.07493(2) 0.02076(11) Uani 1 1 d . . . 
Co2 Co 0.22907(3) 0.19528(3) -0.06418(2) 0.02252(11) Uani 1 1 d . . . 
N1 N 0.24609(18) 0.39877(16) 0.17105(14) 0.0246(6) Uani 1 1 d . . . 
H1A H 0.2496 0.4395 0.1602 0.029 Uiso 1 1 calc R . . 
N2 N 0.2453(2) 0.47773(19) 0.32098(16) 0.0354(7) Uani 1 1 d . . . 
N3 N 0.3392(3) 0.8656(3) 0.4205(2) 0.0584(10) Uani 1 1 d . . . 
N4 N 0.22952(19) 0.09494(16) -0.15984(14) 0.0260(6) Uani 1 1 d . . . 
H4A H 0.2278 0.0539 -0.1493 0.031 Uiso 1 1 calc R . . 
N5 N 0.2364(2) 0.02048(18) -0.30846(15) 0.0316(7) Uani 1 1 d . . . 
N6 N 0.1706(3) -0.3663(2) -0.4011(2) 0.0524(9) Uani 1 1 d . . . 
O1 O 0.10143(15) 0.29027(13) 0.02518(12) 0.0242(5) Uani 1 1 d . . . 
O2 O 0.08950(15) 0.18262(13) -0.08053(12) 0.0263(5) Uani 1 1 d . . . 
O3 O 0.21173(15) 0.20863(12) 0.09206(12) 0.0239(5) Uani 1 1 d . . . 
O4 O 0.23739(15) 0.12699(13) -0.01393(12) 0.0253(5) Uani 1 1 d . . . 
O5 O 0.37407(15) 0.28495(13) 0.09546(12) 0.0246(5) Uani 1 1 d . . . 
O6 O 0.37066(15) 0.22389(13) -0.02191(12) 0.0255(5) Uani 1 1 d . . . 
O7 O 0.26374(15) 0.36942(13) 0.03458(12) 0.0262(5) Uani 1 1 d . . . 
O8 O 0.22168(16) 0.28622(14) -0.08537(13) 0.0308(5) Uani 1 1 d . . . 
O9 O 0.3269(3) 0.5342(2) 0.45234(16) 0.0657(10) Uani 1 1 d . . . 
O10 O 0.1575(3) 0.5079(2) 0.40857(18) 0.0660(10) Uani 1 1 d . . . 
O11 O 0.1579(2) -0.03799(18) -0.44111(14) 0.0488(7) Uani 1 1 d . . . 
O12 O 0.3256(2) -0.00321(18) -0.39365(15) 0.0498(8) Uani 1 1 d . . . 
S1 S 0.24196(9) 0.53472(7) 0.40477(5) 0.0490(3) Uani 1 1 d . . . 
S2 S 0.24321(7) -0.03481(6) -0.39180(5) 0.0390(2) Uani 1 1 d . . . 
  
loop_ 
 _atom_site_aniso_label 
 _atom_site_aniso_U_11 
 _atom_site_aniso_U_22 
 _atom_site_aniso_U_33 
 _atom_site_aniso_U_23 
 _atom_site_aniso_U_13 
 _atom_site_aniso_U_12 
C1 0.0207(15) 0.0261(17) 0.0339(17) 0.0166(15) 0.0139(14) 0.0080(13) 
C2 0.0190(15) 0.0258(17) 0.0282(16) 0.0151(14) 0.0074(13) 0.0015(12) 
C3 0.0202(15) 0.0250(17) 0.0254(15) 0.0167(14) 0.0059(13) 0.0015(12) 
C4 0.0131(14) 0.0272(17) 0.0266(16) 0.0132(14) 0.0026(12) 0.0006(12) 
C5 0.0195(15) 0.038(2) 0.0275(16) 0.0200(15) 0.0080(13) 0.0020(14) 
C6 0.0195(15) 0.0243(17) 0.0332(17) 0.0133(15) 0.0092(13) 0.0048(13) 
C7 0.0196(16) 0.0273(18) 0.0382(19) 0.0162(15) 0.0133(14) 0.0058(13) 
C8 0.0178(15) 0.0215(16) 0.0285(16) 0.0113(14) 0.0037(13) 0.0020(12) 
C9 0.0189(15) 0.035(2) 0.0334(18) 0.0214(16) 0.0049(14) 0.0009(14) 
C10 0.0231(17) 0.043(2) 0.0282(17) 0.0111(16) 0.0065(14) 0.0096(15) 
C11 0.0316(19) 0.039(2) 0.0306(18) 0.0190(17) 0.0106(15) 0.0151(16) 
C12 0.0221(16) 0.0253(17) 0.0375(19) 0.0146(15) 0.0089(14) 0.0004(13) 
C13 0.0266(17) 0.040(2) 0.0291(17) 0.0195(16) 0.0051(14) 0.0125(15) 
C14 0.0235(16) 0.038(2) 0.0279(16) 0.0207(16) 0.0112(13) 0.0121(14) 
C15 0.0255(17) 0.040(2) 0.0376(19) 0.0238(17) 0.0127(15) 0.0106(15) 
C16 0.0246(17) 0.0284(18) 0.0312(17) 0.0149(15) 0.0061(14) 0.0043(14) 
C17 0.0267(18) 0.043(2) 0.039(2) 0.0294(18) 0.0021(15) -0.0025(15) 
C18 0.0197(16) 0.045(2) 0.0310(17) 0.0235(17) 0.0109(14) 0.0067(14) 
C19 0.0300(18) 0.040(2) 0.0384(19) 0.0237(18) 0.0133(16) 0.0040(16) 
C20 0.0266(18) 0.043(2) 0.0354(19) 0.0236(18) 0.0003(15) 0.0036(16) 
C21 0.0220(16) 0.0290(18) 0.0327(17) 0.0147(15) 0.0106(14) 0.0006(13) 
C22 0.0258(18) 0.049(2) 0.0377(19) 0.0261(18) 0.0150(15) 0.0121(16) 
C23 0.0266(18) 0.047(2) 0.0302(19) 0.0079(18) 0.0077(15) 0.0055(17) 
C24 0.0284(17) 0.0299(18) 0.0353(18) 0.0195(16) 0.0138(15) 0.0078(14) 
C25 0.0244(17) 0.044(2) 0.0251(17) 0.0116(16) 0.0073(14) 0.0098(15) 
C26 0.0293(19) 0.047(2) 0.0273(18) 0.0076(17) 0.0040(15) 0.0063(17) 
C27 0.0288(19) 0.054(3) 0.0235(17) 0.0110(17) 0.0077(15) 0.0120(17) 
C28 0.0357(19) 0.0306(19) 0.0280(17) 0.0170(15) 0.0092(15) 0.0124(15) 
C29 0.032(2) 0.052(2) 0.0203(16) 0.0078(17) 0.0080(15) 0.0097(18) 
C30 0.0183(16) 0.040(2) 0.047(2) 0.0218(18) 0.0040(15) 0.0064(15) 
C31 0.0300(18) 0.0259(18) 0.048(2) 0.0187(17) 0.0146(17) 0.0046(14) 
C32 0.0184(15) 0.039(2) 0.0304(17) 0.0208(16) 0.0077(13) 0.0105(14) 
C33 0.0232(16) 0.0318(19) 0.0346(18) 0.0161(16) 0.0118(14) 0.0026(14) 
C34 0.031(2) 0.054(3) 0.0268(18) 0.0087(18) 0.0022(16) 0.0019(18) 
C35 0.038(2) 0.044(2) 0.0194(16) 0.0076(16) 0.0111(15) 0.0116(17) 
C36 0.0175(16) 0.061(3) 0.044(2) 0.032(2) 0.0070(15) 0.0014(17) 
C37 0.039(2) 0.045(2) 0.0238(17) 0.0071(17) 0.0121(16) 0.0098(18) 
C38 0.046(2) 0.050(2) 0.043(2) 0.030(2) 0.0174(19) 0.0161(19) 
C39 0.0271(18) 0.0319(19) 0.043(2) 0.0163(17) 0.0141(16) 0.0091(15) 
C40 0.0237(17) 0.046(2) 0.0289(17) 0.0225(17) 0.0081(14) 0.0011(15) 
C41 0.0208(16) 0.034(2) 0.041(2) 0.0180(17) 0.0121(15) 0.0066(14) 
C42 0.034(2) 0.044(2) 0.0327(19) 0.0186(18) 0.0124(16) -0.0043(17) 
C43 0.0260(17) 0.033(2) 0.0376(19) 0.0155(16) 0.0150(15) 0.0049(14) 
C44 0.0319(19) 0.037(2) 0.039(2) 0.0120(17) 0.0183(17) 0.0020(16) 
C45 0.0245(17) 0.037(2) 0.0354(19) 0.0166(17) 0.0072(15) -0.0066(15) 
C46 0.040(2) 0.043(2) 0.040(2) 0.0280(19) 0.0145(17) 0.0109(17) 
C47 0.039(2) 0.033(2) 0.0328(18) 0.0163(16) 0.0111(16) 0.0088(16) 
C48 0.039(2) 0.053(3) 0.0204(17) 0.0089(17) 0.0085(16) 0.0076(19) 
C49 0.0232(17) 0.045(2) 0.0302(18) 0.0068(17) 0.0093(15) 0.0006(16) 
C50 0.0289(19) 0.060(3) 0.048(2) 0.038(2) 0.0048(17) -0.0030(18) 
C51 0.0274(18) 0.041(2) 0.0255(17) 0.0090(16) 0.0065(14) 0.0051(16) 
C52 0.0293(19) 0.041(2) 0.042(2) 0.0167(19) 0.0063(17) 0.0087(16) 
C53 0.055(3) 0.038(2) 0.048(2) 0.023(2) 0.016(2) 0.016(2) 
C54 0.038(2) 0.047(2) 0.0350(19) 0.0192(18) 0.0184(17) 0.0168(18) 
C55 0.040(2) 0.048(2) 0.0316(19) 0.0123(18) 0.0136(17) 0.0149(19) 
C56 0.039(2) 0.035(2) 0.050(2) 0.0279(19) 0.0086(18) 0.0082(17) 
C57 0.042(2) 0.035(2) 0.054(2) 0.028(2) 0.0196(19) 0.0101(17) 
C58 0.035(2) 0.044(2) 0.037(2) 0.0161(19) 0.0064(17) 0.0063(17) 
C59 0.045(2) 0.053(3) 0.0286(19) 0.0034(19) 0.0123(18) 0.002(2) 
C60 0.036(2) 0.037(2) 0.049(2) 0.0284(19) 0.0044(18) 0.0018(16) 
C61 0.0327(19) 0.033(2) 0.037(2) 0.0112(17) 0.0098(16) 0.0102(16) 
C62 0.0223(17) 0.055(2) 0.0349(19) 0.0236(19) 0.0046(15) -0.0049(16) 
C63 0.047(2) 0.053(3) 0.0262(18) 0.0096(19) 0.0104(17) 0.005(2) 
C64 0.035(2) 0.051(3) 0.034(2) 0.0116(19) 0.0136(17) 0.0118(18) 
C65 0.0319(19) 0.039(2) 0.0310(18) 0.0165(17) 0.0057(15) 0.0057(16) 
C66 0.035(2) 0.049(3) 0.037(2) 0.0179(19) 0.0025(17) -0.0034(18) 
C67 0.0296(19) 0.039(2) 0.038(2) 0.0166(18) 0.0070(16) -0.0015(16) 
C68 0.035(2) 0.037(2) 0.042(2) 0.0141(18) 0.0163(17) 0.0058(17) 
C69 0.035(2) 0.043(2) 0.042(2) 0.0210(19) 0.0009(17) 0.0043(18) 
C70 0.0322(19) 0.036(2) 0.0350(19) 0.0172(17) 0.0066(16) -0.0043(16) 
C71 0.047(2) 0.049(2) 0.0241(18) 0.0100(18) 0.0111(17) 0.0060(19) 
C72 0.049(2) 0.033(2) 0.054(3) 0.016(2) 0.018(2) -0.0001(18) 
C73 0.030(2) 0.055(3) 0.033(2) 0.0107(19) 0.0117(16) 0.0148(18) 
C74 0.036(2) 0.056(3) 0.035(2) 0.016(2) 0.0119(17) 0.0143(19) 
C75 0.0218(17) 0.051(2) 0.043(2) 0.0291(19) 0.0136(15) 0.0087(16) 
C76 0.037(2) 0.031(2) 0.044(2) 0.0217(18) 0.0082(17) 0.0083(16) 
C77 0.039(2) 0.040(2) 0.049(2) 0.024(2) 0.0078(19) -0.0017(18) 
C78 0.048(2) 0.047(3) 0.038(2) 0.013(2) 0.0088(19) -0.006(2) 
C79 0.041(2) 0.037(2) 0.046(2) 0.0233(19) 0.0104(18) 0.0105(17) 
C80 0.050(3) 0.041(2) 0.042(2) 0.0157(19) 0.018(2) 0.0095(19) 
C81 0.047(2) 0.048(3) 0.0295(19) 0.0117(19) 0.0044(18) 0.012(2) 
C82 0.048(2) 0.059(3) 0.032(2) 0.027(2) 0.0136(18) 0.027(2) 
C83 0.042(2) 0.061(3) 0.044(2) 0.020(2) 0.016(2) 0.005(2) 
C84 0.043(2) 0.056(3) 0.0305(19) 0.0129(19) 0.0162(18) 0.006(2) 
C85 0.056(3) 0.037(2) 0.036(2) 0.0151(19) -0.0009(19) 0.016(2) 
C86 0.047(3) 0.036(2) 0.058(3) 0.021(2) 0.010(2) 0.0037(19) 
C87 0.053(3) 0.063(3) 0.0246(19) 0.009(2) 0.0086(18) -0.002(2) 
C88 0.043(2) 0.060(3) 0.038(2) 0.019(2) 0.0048(19) -0.001(2) 
C89 0.037(2) 0.064(3) 0.043(2) 0.038(2) 0.0132(18) 0.0004(19) 
C90 0.049(3) 0.061(3) 0.034(2) 0.014(2) 0.0105(19) 0.014(2) 
C91 0.033(2) 0.064(3) 0.036(2) 0.014(2) 0.0076(17) 0.004(2) 
C92 0.059(3) 0.050(3) 0.041(2) 0.023(2) 0.023(2) 0.011(2) 
C93 0.077(4) 0.040(3) 0.073(3) 0.018(3) 0.024(3) 0.012(2) 
C94 0.085(4) 0.072(3) 0.041(2) 0.033(2) 0.031(2) 0.039(3) 
C95 0.042(2) 0.083(4) 0.075(3) 0.063(3) 0.015(2) 0.000(2) 
C96 0.062(3) 0.066(3) 0.036(2) 0.027(2) 0.015(2) 0.003(2) 
C97 0.048(3) 0.055(3) 0.033(2) 0.012(2) 0.0102(19) 0.014(2) 
C98 0.038(2) 0.054(3) 0.042(2) 0.006(2) 0.0112(19) 0.012(2) 
C99 0.070(3) 0.055(3) 0.062(3) 0.021(3) 0.029(3) 0.004(3) 
C100 0.080(4) 0.051(3) 0.033(2) 0.014(2) 0.020(2) 0.020(3) 
C101 0.059(3) 0.037(2) 0.051(3) 0.016(2) 0.014(2) 0.012(2) 
C102 0.054(3) 0.060(3) 0.094(4) 0.059(3) 0.022(3) 0.006(2) 
C103 0.078(4) 0.077(4) 0.080(4) 0.036(3) 0.024(3) -0.003(3) 
C104 0.038(2) 0.075(4) 0.041(2) 0.011(2) 0.006(2) 0.004(2) 
C105 0.074(4) 0.049(3) 0.045(3) 0.007(2) -0.008(2) 0.016(3) 
C106 0.083(4) 0.099(5) 0.063(3) 0.050(3) 0.015(3) 0.011(3) 
C107 0.051(3) 0.121(5) 0.050(3) 0.026(3) 0.021(2) 0.035(3) 
C108 0.041(3) 0.072(3) 0.045(3) 0.018(2) 0.012(2) 0.000(2) 
C109 0.078(4) 0.070(4) 0.057(3) 0.035(3) 0.017(3) 0.015(3) 
C110 0.057(3) 0.059(3) 0.066(3) 0.031(3) 0.003(3) 0.005(2) 
C111 0.051(3) 0.048(3) 0.073(3) 0.042(3) 0.015(2) 0.008(2) 
C112 0.066(3) 0.060(3) 0.056(3) 0.025(3) 0.027(3) 0.026(3) 
C113 0.084(4) 0.066(4) 0.052(3) 0.026(3) 0.009(3) -0.009(3) 
C114 0.054(3) 0.079(4) 0.071(3) 0.029(3) 0.037(3) 0.005(3) 
C115 0.082(5) 0.092(5) 0.121(6) 0.023(4) 0.062(4) 0.007(4) 
C116 0.044(3) 0.122(6) 0.083(4) 0.017(4) 0.028(3) 0.029(3) 
C117 0.051(5) 0.229(12) 0.177(10) 0.173(10) 0.033(5) 0.039(6) 
C118 0.074(4) 0.126(6) 0.062(4) 0.025(4) -0.001(3) 0.011(4) 
C119 0.085(5) 0.090(5) 0.163(8) 0.063(6) -0.008(5) -0.015(4) 
C120 0.140(7) 0.147(8) 0.090(5) 0.065(5) 0.041(5) 0.085(6) 
Cl1 0.144(2) 0.247(3) 0.190(3) 0.148(3) 0.117(2) 0.109(2) 
Cl2 0.1039(14) 0.1127(15) 0.1344(17) 0.0673(14) 0.0386(13) 0.0416(12) 
Cl3 0.0893(18) 0.0761(16) 0.104(2) 0.0401(17) 0.0046(15) -0.0102(13) 
Cl4 0.0876(11) 0.0944(12) 0.0845(11) 0.0405(10) 0.0195(9) 0.0258(9) 
Cl5 0.128(2) 0.063(2) 0.139(4) 0.043(2) 0.050(2) 0.0108(15) 
Cl6 0.160(5) 0.148(4) 0.094(3) 0.071(3) -0.014(3) -0.016(3) 
Cl7 0.090(4) 0.183(4) 0.114(3) 0.097(3) 0.027(2) -0.029(3) 
Cl8 0.043(3) 0.272(8) 0.116(6) 0.109(5) 0.032(3) 0.001(4) 
Cl3A 0.31(2) 0.114(9) 0.081(6) 0.037(6) 0.077(10) 0.030(11) 
Cl5A 0.55(4) 0.096(12) 0.131(14) 0.049(10) 0.103(18) 0.063(16) 
Cl6A 0.093(4) 0.124(5) 0.101(4) 0.072(4) -0.006(3) 0.001(3) 
Cl7A 0.091(6) 0.47(2) 0.259(15) 0.267(16) 0.041(6) -0.036(9) 
Cl8A 0.048(6) 0.350(17) 0.090(6) 0.110(8) 0.034(5) 0.009(7) 
Co1 0.0185(2) 0.0219(2) 0.0225(2) 0.01101(18) 0.00543(17) 0.00278(16) 
Co2 0.0192(2) 0.0261(2) 0.0223(2) 0.01100(19) 0.00624(17) 0.00462(17) 
N1 0.0237(14) 0.0245(14) 0.0263(14) 0.0125(12) 0.0073(11) 0.0016(11) 
N2 0.0405(18) 0.0397(18) 0.0251(15) 0.0132(14) 0.0113(13) 0.0048(14) 
N3 0.063(3) 0.063(3) 0.050(2) 0.027(2) 0.015(2) 0.007(2) 
N4 0.0257(14) 0.0299(15) 0.0240(13) 0.0128(12) 0.0090(11) 0.0062(12) 
N5 0.0289(15) 0.0438(18) 0.0210(14) 0.0139(13) 0.0070(12) 0.0086(13) 
N6 0.058(2) 0.054(2) 0.047(2) 0.0223(19) 0.0203(19) 0.0108(19) 
O1 0.0214(11) 0.0259(12) 0.0251(11) 0.0132(10) 0.0040(9) 0.0013(9) 
O2 0.0204(11) 0.0296(13) 0.0279(12) 0.0112(10) 0.0088(9) 0.0075(9) 
O3 0.0233(11) 0.0240(12) 0.0293(12) 0.0148(10) 0.0105(9) 0.0069(9) 
O4 0.0213(11) 0.0303(13) 0.0267(12) 0.0147(10) 0.0079(9) 0.0040(9) 
O5 0.0184(11) 0.0303(13) 0.0275(11) 0.0147(10) 0.0078(9) 0.0043(9) 
O6 0.0196(11) 0.0317(13) 0.0258(11) 0.0140(10) 0.0063(9) 0.0026(9) 
O7 0.0241(12) 0.0300(13) 0.0308(12) 0.0200(11) 0.0074(10) 0.0041(10) 
O8 0.0290(13) 0.0370(14) 0.0314(13) 0.0212(12) 0.0069(10) 0.0024(11) 
O9 0.090(3) 0.077(2) 0.0292(15) 0.0275(16) 0.0095(16) 0.018(2) 
O10 0.092(3) 0.073(2) 0.0502(19) 0.0312(18) 0.0424(19) 0.009(2) 
O11 0.0551(19) 0.063(2) 0.0274(13) 0.0224(14) 0.0080(13) 0.0179(15) 
O12 0.064(2) 0.060(2) 0.0368(15) 0.0257(15) 0.0255(14) 0.0118(16) 
S1 0.0700(8) 0.0524(7) 0.0257(5) 0.0174(5) 0.0168(5) 0.0078(6) 
S2 0.0444(6) 0.0496(6) 0.0240(4) 0.0160(4) 0.0129(4) 0.0115(5) 
  
_geom_special_details 
; 
 All esds (except the esd in the dihedral angle between two l.s. planes) 
 are estimated using the full covariance matrix.  The cell esds are taken 
 into account individually in the estimation of esds in distances, angles 
 and torsion angles; correlations between esds in cell parameters are only 
 used when they are defined by crystal symmetry.  An approximate (isotropic) 
 treatment of cell esds is used for estimating esds involving l.s. planes. 
; 
  
loop_ 
 _geom_bond_atom_site_label_1 
 _geom_bond_atom_site_label_2 
 _geom_bond_distance 
 _geom_bond_site_symmetry_2 
 _geom_bond_publ_flag 
C1 C24 1.388(5) . ? 
C1 C7 1.447(5) . ? 
C1 C4 1.481(4) . ? 
C2 O6 1.247(4) . ? 
C2 O5 1.265(4) . ? 
C2 C5 1.518(4) . ? 
C3 O1 1.273(4) . ? 
C3 O2 1.277(4) . ? 
C3 C8 1.519(4) . ? 
C4 O4 1.247(4) . ? 
C4 O3 1.296(4) . ? 
C5 C18 1.431(5) . ? 
C5 C40 1.441(5) . ? 
C6 C41 1.402(5) . ? 
C6 C8 1.413(5) . ? 
C6 C21 1.471(5) . ? 
C7 C31 1.370(5) . ? 
C7 C12 1.478(5) . ? 
C8 C16 1.388(5) . ? 
C9 O7 1.233(4) . ? 
C9 O8 1.287(4) . ? 
C9 C17 1.500(5) . ? 
C10 N4 1.463(4) . ? 
C10 C51 1.550(5) . ? 
C11 C54 1.385(5) . ? 
C11 C15 1.409(5) . ? 
C11 C80 1.525(6) . ? 
C12 C61 1.385(5) . ? 
C12 C39 1.415(5) . ? 
C13 C47 1.369(5) . ? 
C13 C58 1.425(5) . ? 
C13 C16 1.495(5) . ? 
C14 C32 1.391(5) . ? 
C14 C15 1.406(5) . ? 
C16 C20 1.394(5) . ? 
C17 C50 1.381(5) . ? 
C17 C60 1.441(6) . ? 
C18 C75 1.396(5) . ? 
C18 C32 1.519(5) . ? 
C19 C33 1.364(5) . ? 
C19 C42 1.416(5) . ? 
C20 C30 1.378(5) . ? 
C21 C33 1.385(5) . ? 
C21 C43 1.422(5) . ? 
C22 C32 1.405(5) . ? 
C22 C54 1.417(6) . ? 
C23 N2 1.458(5) . ? 
C23 C49 1.544(5) . ? 
C24 C46 1.382(5) . ? 
C24 C28 1.522(5) . ? 
C25 N4 1.471(4) . ? 
C25 C27 1.550(5) . ? 
C26 N1 1.458(4) . ? 
C26 C34 1.553(5) . ? 
C27 N5 1.455(4) . ? 
C28 C65 1.373(5) . ? 
C28 C92 1.399(5) . ? 
C29 C74 1.417(5) . ? 
C29 C37 1.425(6) . ? 
C29 C35 1.431(6) . ? 
C30 C41 1.366(5) . ? 
C31 C57 1.358(6) . ? 
C34 N2 1.463(5) . ? 
C35 C64 1.378(5) . ? 
C35 S2 1.777(4) . ? 
C36 C75 1.404(6) . ? 
C36 C62 1.408(6) . ? 
C37 C55 1.417(6) . ? 
C37 C84 1.438(6) . ? 
C38 C47 1.378(5) . ? 
C38 C82 1.426(6) . ? 
C39 C68 1.369(5) . ? 
C40 C62 1.388(5) . ? 
C40 C45 1.527(5) . ? 
C42 C44 1.388(6) . ? 
C42 C96 1.503(5) . ? 
C43 C44 1.362(5) . ? 
C45 C70 1.363(5) . ? 
C45 C66 1.409(5) . ? 
C46 C57 1.403(6) . ? 
C48 C63 1.415(6) . ? 
C48 C71 1.420(6) . ? 
C48 C90 1.430(6) . ? 
C49 N1 1.467(4) . ? 
C50 C95 1.406(6) . ? 
C50 C89 1.515(6) . ? 
C51 N5 1.464(5) . ? 
C52 C61 1.373(5) . ? 
C52 C67 1.408(6) . ? 
C53 C101 1.388(6) . ? 
C53 C79 1.424(6) . ? 
C53 C112 1.516(6) . ? 
C55 C73 1.355(6) . ? 
C56 C76 1.391(5) . ? 
C56 C86 1.431(6) . ? 
C56 C60 1.484(6) . ? 
C58 C81 1.373(6) . ? 
C59 C71 1.375(6) . ? 
C59 C98 1.400(7) . ? 
C60 C111 1.389(6) . ? 
C63 C87 1.421(6) . ? 
C63 C97 1.434(6) . ? 
C64 C73 1.402(6) . ? 
C65 C69 1.397(5) . ? 
C66 C78 1.422(6) . ? 
C67 C68 1.391(6) . ? 
C67 C88 1.490(5) . ? 
C69 C85 1.395(6) . ? 
C70 C77 1.404(6) . ? 
C71 S1 1.778(5) . ? 
C72 C78 1.366(6) . ? 
C72 C77 1.393(6) . ? 
C72 C93 1.545(6) . ? 
C74 C91 1.365(6) . ? 
C76 C79 1.372(6) . ? 
C81 C82 1.369(6) . ? 
C82 C94 1.500(6) . ? 
C83 C84 1.369(6) . ? 
C83 C91 1.378(7) . ? 
C84 N6 1.399(6) . ? 
C85 C100 1.366(7) . ? 
C85 C105 1.536(6) . ? 
C86 C101 1.363(7) . ? 
C87 C108 1.368(7) . ? 
C87 N3 1.419(6) . ? 
C89 C107 1.362(6) . ? 
C89 C110 1.368(7) . ? 
C90 C104 1.355(7) . ? 
C92 C100 1.412(7) . ? 
C95 C102 1.403(7) . ? 
C97 C98 1.346(7) . ? 
C99 N6 1.464(6) . ? 
C102 C111 1.355(7) . ? 
C103 N3 1.456(7) . ? 
C104 C108 1.382(7) . ? 
C106 N3 1.447(6) . ? 
C107 C116 1.403(8) . ? 
C109 N6 1.447(6) . ? 
C110 C113 1.415(8) . ? 
C113 C114 1.360(8) . ? 
C114 C116 1.392(8) . ? 
C114 C115 1.548(8) . ? 
C117 Cl8 1.707(8) . ? 
C117 Cl4 1.697(7) . ? 
C117 Cl8A 1.721(10) . ? 
C118 Cl1 1.681(7) . ? 
C118 Cl2 1.766(8) . ? 
C119 Cl3A 1.630(9) . ? 
C119 Cl5 1.701(10) . ? 
C119 Cl5A 1.71(3) . ? 
C119 Cl3 1.792(8) . ? 
C120 Cl7A 1.625(9) . ? 
C120 Cl6 1.622(9) . ? 
C120 Cl7 1.790(8) . ? 
C120 Cl6A 1.881(10) . ? 
Co1 O3 1.993(2) . ? 
Co1 O7 2.031(2) . ? 
Co1 O5 2.033(2) . ? 
Co1 O1 2.039(2) . ? 
Co1 N1 2.114(3) . ? 
Co1 Co2 2.7200(15) . ? 
Co2 O8 2.024(3) . ? 
Co2 O4 2.038(2) . ? 
Co2 O2 2.051(2) . ? 
Co2 O6 2.066(2) . ? 
Co2 N4 2.128(3) . ? 
N2 S1 1.655(3) . ? 
N5 S2 1.659(3) . ? 
O9 S1 1.417(4) . ? 
O10 S1 1.420(4) . ? 
O11 S2 1.416(3) . ? 
O12 S2 1.412(3) . ? 
  
loop_ 
 _geom_angle_atom_site_label_1 
 _geom_angle_atom_site_label_2 
 _geom_angle_atom_site_label_3 
 _geom_angle 
 _geom_angle_site_symmetry_1 
 _geom_angle_site_symmetry_3 
 _geom_angle_publ_flag 
C24 C1 C7 120.0(3) . . ? 
C24 C1 C4 118.1(3) . . ? 
C7 C1 C4 121.9(3) . . ? 
O6 C2 O5 125.6(3) . . ? 
O6 C2 C5 118.1(3) . . ? 
O5 C2 C5 116.2(3) . . ? 
O1 C3 O2 126.5(3) . . ? 
O1 C3 C8 115.7(3) . . ? 
O2 C3 C8 117.7(3) . . ? 
O4 C4 O3 125.8(3) . . ? 
O4 C4 C1 115.4(3) . . ? 
O3 C4 C1 118.8(3) . . ? 
C18 C5 C40 121.4(3) . . ? 
C18 C5 C2 119.7(3) . . ? 
C40 C5 C2 118.8(3) . . ? 
C41 C6 C8 119.8(3) . . ? 
C41 C6 C21 115.4(3) . . ? 
C8 C6 C21 124.7(3) . . ? 
C31 C7 C1 120.5(3) . . ? 
C31 C7 C12 114.0(3) . . ? 
C1 C7 C12 125.3(3) . . ? 
C16 C8 C6 118.6(3) . . ? 
C16 C8 C3 120.8(3) . . ? 
C6 C8 C3 120.6(3) . . ? 
O7 C9 O8 126.7(3) . . ? 
O7 C9 C17 113.3(3) . . ? 
O8 C9 C17 120.1(3) . . ? 
N4 C10 C51 112.9(3) . . ? 
C54 C11 C15 115.5(3) . . ? 
C54 C11 C80 121.2(3) . . ? 
C15 C11 C80 123.2(3) . . ? 
C61 C12 C39 118.4(3) . . ? 
C61 C12 C7 119.6(3) . . ? 
C39 C12 C7 121.6(3) . . ? 
C47 C13 C58 119.6(3) . . ? 
C47 C13 C16 120.5(3) . . ? 
C58 C13 C16 119.6(3) . . ? 
C32 C14 C15 120.5(3) . . ? 
C14 C15 C11 123.7(3) . . ? 
C8 C16 C20 119.8(3) . . ? 
C8 C16 C13 124.8(3) . . ? 
C20 C16 C13 115.4(3) . . ? 
C50 C17 C60 120.4(3) . . ? 
C50 C17 C9 117.8(4) . . ? 
C60 C17 C9 121.6(3) . . ? 
C75 C18 C5 118.1(3) . . ? 
C75 C18 C32 115.3(3) . . ? 
C5 C18 C32 126.6(3) . . ? 
C33 C19 C42 120.7(4) . . ? 
C30 C20 C16 121.7(3) . . ? 
C33 C21 C43 119.3(3) . . ? 
C33 C21 C6 119.5(3) . . ? 
C43 C21 C6 120.9(3) . . ? 
C32 C22 C54 122.8(3) . . ? 
N2 C23 C49 108.4(3) . . ? 
C46 C24 C1 117.2(3) . . ? 
C46 C24 C28 117.4(3) . . ? 
C1 C24 C28 125.3(3) . . ? 
N4 C25 C27 112.3(3) . . ? 
N1 C26 C34 112.5(3) . . ? 
N5 C27 C25 109.4(3) . . ? 
C65 C28 C92 115.8(4) . . ? 
C65 C28 C24 122.3(3) . . ? 
C92 C28 C24 121.6(4) . . ? 
C74 C29 C37 117.6(4) . . ? 
C74 C29 C35 124.8(4) . . ? 
C37 C29 C35 117.5(3) . . ? 
C41 C30 C20 119.1(3) . . ? 
C57 C31 C7 119.2(4) . . ? 
C14 C32 C22 116.2(3) . . ? 
C14 C32 C18 121.7(3) . . ? 
C22 C32 C18 121.8(3) . . ? 
C19 C33 C21 119.6(3) . . ? 
N2 C34 C26 108.2(3) . . ? 
C64 C35 C29 120.7(4) . . ? 
C64 C35 S2 115.2(3) . . ? 
C29 C35 S2 123.8(3) . . ? 
C75 C36 C62 120.9(3) . . ? 
C55 C37 C29 119.4(4) . . ? 
C55 C37 C84 120.4(4) . . ? 
C29 C37 C84 120.2(4) . . ? 
C47 C38 C82 122.1(4) . . ? 
C68 C39 C12 121.9(4) . . ? 
C62 C40 C5 118.1(3) . . ? 
C62 C40 C45 116.4(3) . . ? 
C5 C40 C45 125.3(3) . . ? 
C30 C41 C6 121.0(3) . . ? 
C44 C42 C19 120.2(3) . . ? 
C44 C42 C96 119.0(4) . . ? 
C19 C42 C96 120.8(4) . . ? 
C44 C43 C21 121.4(4) . . ? 
C43 C44 C42 118.8(4) . . ? 
C70 C45 C66 115.9(4) . . ? 
C70 C45 C40 121.8(3) . . ? 
C66 C45 C40 122.2(3) . . ? 
C24 C46 C57 122.3(4) . . ? 
C13 C47 C38 118.5(4) . . ? 
C63 C48 C71 117.4(4) . . ? 
C63 C48 C90 118.1(4) . . ? 
C71 C48 C90 124.4(4) . . ? 
N1 C49 C23 113.3(3) . . ? 
C17 C50 C95 117.3(4) . . ? 
C17 C50 C89 124.7(4) . . ? 
C95 C50 C89 117.9(4) . . ? 
N5 C51 C10 107.9(3) . . ? 
C61 C52 C67 121.9(4) . . ? 
C101 C53 C79 118.3(4) . . ? 
C101 C53 C112 120.0(4) . . ? 
C79 C53 C112 121.7(4) . . ? 
C11 C54 C22 121.2(3) . . ? 
C73 C55 C37 121.5(4) . . ? 
C76 C56 C86 118.8(4) . . ? 
C76 C56 C60 120.3(4) . . ? 
C86 C56 C60 120.6(4) . . ? 
C31 C57 C46 120.8(4) . . ? 
C81 C58 C13 121.6(4) . . ? 
C71 C59 C98 120.3(4) . . ? 
C111 C60 C17 120.4(4) . . ? 
C111 C60 C56 113.2(4) . . ? 
C17 C60 C56 126.4(3) . . ? 
C52 C61 C12 119.7(4) . . ? 
C40 C62 C36 120.8(4) . . ? 
C48 C63 C87 120.1(4) . . ? 
C48 C63 C97 119.9(4) . . ? 
C87 C63 C97 120.1(5) . . ? 
C35 C64 C73 120.8(4) . . ? 
C28 C65 C69 122.1(4) . . ? 
C45 C66 C78 122.9(4) . . ? 
C68 C67 C52 118.6(4) . . ? 
C68 C67 C88 120.0(4) . . ? 
C52 C67 C88 121.5(4) . . ? 
C39 C68 C67 119.5(4) . . ? 
C85 C69 C65 122.4(4) . . ? 
C45 C70 C77 121.0(4) . . ? 
C59 C71 C48 121.3(4) . . ? 
C59 C71 S1 115.4(4) . . ? 
C48 C71 S1 123.0(3) . . ? 
C78 C72 C77 116.2(4) . . ? 
C78 C72 C93 120.3(4) . . ? 
C77 C72 C93 123.5(4) . . ? 
C55 C73 C64 119.9(4) . . ? 
C91 C74 C29 119.9(4) . . ? 
C18 C75 C36 120.8(4) . . ? 
C79 C76 C56 118.9(4) . . ? 
C72 C77 C70 123.7(4) . . ? 
C72 C78 C66 120.3(4) . . ? 
C76 C79 C53 122.4(4) . . ? 
C82 C81 C58 119.2(4) . . ? 
C81 C82 C38 118.9(4) . . ? 
C81 C82 C94 119.4(4) . . ? 
C38 C82 C94 121.7(4) . . ? 
C84 C83 C91 120.4(4) . . ? 
C83 C84 N6 123.4(4) . . ? 
C83 C84 C37 118.8(4) . . ? 
N6 C84 C37 117.9(4) . . ? 
C100 C85 C69 115.8(4) . . ? 
C100 C85 C105 121.4(4) . . ? 
C69 C85 C105 122.8(5) . . ? 
C101 C86 C56 121.6(4) . . ? 
C108 C87 C63 119.2(5) . . ? 
C108 C87 N3 122.6(5) . . ? 
C63 C87 N3 118.2(4) . . ? 
C107 C89 C110 116.5(5) . . ? 
C107 C89 C50 118.8(4) . . ? 
C110 C89 C50 124.5(4) . . ? 
C104 C90 C48 119.5(5) . . ? 
C74 C91 C83 122.7(4) . . ? 
C28 C92 C100 121.7(4) . . ? 
C102 C95 C50 121.8(4) . . ? 
C98 C97 C63 120.3(5) . . ? 
C97 C98 C59 120.8(4) . . ? 
C85 C100 C92 122.2(4) . . ? 
C86 C101 C53 120.0(4) . . ? 
C111 C102 C95 121.1(4) . . ? 
C90 C104 C108 122.3(5) . . ? 
C89 C107 C116 121.5(5) . . ? 
C87 C108 C104 120.6(5) . . ? 
C89 C110 C113 122.3(5) . . ? 
C102 C111 C60 119.0(5) . . ? 
C114 C113 C110 121.6(5) . . ? 
C113 C114 C116 115.7(5) . . ? 
C113 C114 C115 122.1(6) . . ? 
C116 C114 C115 122.2(6) . . ? 
C114 C116 C107 122.3(5) . . ? 
Cl8 C117 Cl4 118.0(6) . . ? 
Cl8 C117 Cl8A 17.3(6) . . ? 
Cl4 C117 Cl8A 110.5(8) . . ? 
Cl1 C118 Cl2 113.3(5) . . ? 
Cl3A C119 Cl5 122.9(8) . . ? 
Cl3A C119 Cl5A 102.0(10) . . ? 
Cl5 C119 Cl5A 21.3(6) . . ? 
Cl3A C119 Cl3 27.1(5) . . ? 
Cl5 C119 Cl3 114.5(5) . . ? 
Cl5A C119 Cl3 98.0(9) . . ? 
Cl7A C120 Cl6 110.2(7) . . ? 
Cl7A C120 Cl7 23.0(5) . . ? 
Cl6 C120 Cl7 115.8(5) . . ? 
Cl7A C120 Cl6A 113.7(7) . . ? 
Cl6 C120 Cl6A 35.7(3) . . ? 
Cl7 C120 Cl6A 104.5(4) . . ? 
O3 Co1 O7 167.04(9) . . ? 
O3 Co1 O5 89.97(9) . . ? 
O7 Co1 O5 88.32(9) . . ? 
O3 Co1 O1 90.37(9) . . ? 
O7 Co1 O1 87.77(9) . . ? 
O5 Co1 O1 163.99(9) . . ? 
O3 Co1 N1 108.25(11) . . ? 
O7 Co1 N1 84.70(11) . . ? 
O5 Co1 N1 98.94(10) . . ? 
O1 Co1 N1 96.15(10) . . ? 
O3 Co1 Co2 87.57(8) . . ? 
O7 Co1 Co2 79.48(8) . . ? 
O5 Co1 Co2 83.35(7) . . ? 
O1 Co1 Co2 80.67(7) . . ? 
N1 Co1 Co2 163.95(8) . . ? 
O8 Co2 O4 163.60(10) . . ? 
O8 Co2 O2 90.93(10) . . ? 
O4 Co2 O2 87.24(9) . . ? 
O8 Co2 O6 89.65(9) . . ? 
O4 Co2 O6 88.33(9) . . ? 
O2 Co2 O6 166.24(9) . . ? 
O8 Co2 N4 109.87(11) . . ? 
O4 Co2 N4 86.52(11) . . ? 
O2 Co2 N4 96.67(10) . . ? 
O6 Co2 N4 96.05(10) . . ? 
O8 Co2 Co1 85.61(8) . . ? 
O4 Co2 Co1 78.00(8) . . ? 
O2 Co2 Co1 84.78(7) . . ? 
O6 Co2 Co1 81.56(7) . . ? 
N4 Co2 Co1 164.38(8) . . ? 
C26 N1 C49 110.7(3) . . ? 
C26 N1 Co1 113.3(2) . . ? 
C49 N1 Co1 110.3(2) . . ? 
C23 N2 C34 112.0(3) . . ? 
C23 N2 S1 114.4(3) . . ? 
C34 N2 S1 118.2(3) . . ? 
C87 N3 C106 109.6(4) . . ? 
C87 N3 C103 117.3(4) . . ? 
C106 N3 C103 113.3(5) . . ? 
C10 N4 C25 111.3(3) . . ? 
C10 N4 Co2 112.6(2) . . ? 
C25 N4 Co2 110.3(2) . . ? 
C27 N5 C51 111.9(3) . . ? 
C27 N5 S2 114.7(2) . . ? 
C51 N5 S2 117.5(2) . . ? 
C84 N6 C109 112.2(4) . . ? 
C84 N6 C99 116.3(4) . . ? 
C109 N6 C99 113.1(4) . . ? 
C3 O1 Co1 123.9(2) . . ? 
C3 O2 Co2 118.6(2) . . ? 
C4 O3 Co1 117.1(2) . . ? 
C4 O4 Co2 127.6(2) . . ? 
C2 O5 Co1 122.4(2) . . ? 
C2 O6 Co2 123.1(2) . . ? 
C9 O7 Co1 126.0(2) . . ? 
C9 O8 Co2 117.9(2) . . ? 
O9 S1 O10 120.2(2) . . ? 
O9 S1 N2 105.8(2) . . ? 
O10 S1 N2 104.98(19) . . ? 
O9 S1 C71 110.9(2) . . ? 
O10 S1 C71 106.2(2) . . ? 
N2 S1 C71 108.11(17) . . ? 
O12 S2 O11 119.83(19) . . ? 
O12 S2 N5 104.51(17) . . ? 
O11 S2 N5 106.30(17) . . ? 
O12 S2 C35 106.76(19) . . ? 
O11 S2 C35 110.26(19) . . ? 
N5 S2 C35 108.65(16) . . ? 
  
_diffrn_measured_fraction_theta_max    0.852 
_diffrn_reflns_theta_full              28.96 
_diffrn_measured_fraction_theta_full   0.852 
_refine_diff_density_max    1.742 
_refine_diff_density_min   -0.954 
_refine_diff_density_rms    0.113 


#===END


  
data_Compound3 
  
_audit_creation_method            SHELXL-97 
_chemical_name_systematic 
; 
 ? 
; 
_chemical_name_common             ? 
_chemical_melting_point           ? 
_chemical_formula_moiety          ? 
_chemical_formula_sum 
 'C120 H110 Co2 N6 O13 S2' 
_chemical_formula_weight          2026.12 
  
loop_ 
 _atom_type_symbol 
 _atom_type_description 
 _atom_type_scat_dispersion_real 
 _atom_type_scat_dispersion_imag 
 _atom_type_scat_source 
 'C'  'C'   0.0033   0.0016 
 'International Tables Vol C Tables 4.2.6.8 and 6.1.1.4' 
 'H'  'H'   0.0000   0.0000 
 'International Tables Vol C Tables 4.2.6.8 and 6.1.1.4' 
 'N'  'N'   0.0061   0.0033 
 'International Tables Vol C Tables 4.2.6.8 and 6.1.1.4' 
 'O'  'O'   0.0106   0.0060 
 'International Tables Vol C Tables 4.2.6.8 and 6.1.1.4' 
 'S'  'S'   0.1246   0.1234 
 'International Tables Vol C Tables 4.2.6.8 and 6.1.1.4' 
 'Co'  'Co'   0.3494   0.9721 
 'International Tables Vol C Tables 4.2.6.8 and 6.1.1.4' 
  
_symmetry_cell_setting            Triclinic 
_symmetry_space_group_name_H-M    P-1 
  
loop_ 
 _symmetry_equiv_pos_as_xyz 
 'x, y, z' 
 '-x, -y, -z' 
  
_cell_length_a                    12.582(3) 
_cell_length_b                    13.760(4) 
_cell_length_c                    16.521(3) 
_cell_angle_alpha                 100.985(10) 
_cell_angle_beta                  106.601(11) 
_cell_angle_gamma                 103.58(2) 
_cell_volume                      2560.5(10) 
_cell_formula_units_Z             1 
_cell_measurement_temperature     173(2) 
_cell_measurement_reflns_used     986 
_cell_measurement_theta_min       2.29 
_cell_measurement_theta_max       24.78 
  
_exptl_crystal_description        plate 
_exptl_crystal_colour             purple 
_exptl_crystal_size_max           0.40 
_exptl_crystal_size_mid           0.30 
_exptl_crystal_size_min           0.05 
_exptl_crystal_density_meas       0 
_exptl_crystal_density_diffrn     1.314 
_exptl_crystal_density_method     'not measured' 
_exptl_crystal_F_000              1062 
_exptl_absorpt_coefficient_mu     0.432 
_exptl_absorpt_correction_type    'sadabs' 
_exptl_absorpt_correction_T_min   0.892689
_exptl_absorpt_correction_T_max   1.000000 
_exptl_absorpt_process_details    ? 
  
_exptl_special_details 
; 
 ? 
; 
  
_diffrn_ambient_temperature       173(2) 
_diffrn_radiation_wavelength      0.71073 
_diffrn_radiation_type            MoK\a 
_diffrn_radiation_source          'fine-focus sealed tube' 
_diffrn_radiation_monochromator   graphite 
_diffrn_measurement_device_type   'CCD area detector' 
_diffrn_measurement_method        'phi and omega scans' 
_diffrn_detector_area_resol_mean  ? 
_diffrn_standards_number          ? 
_diffrn_standards_interval_count  ? 
_diffrn_standards_interval_time   ? 
_diffrn_standards_decay_%         ? 
_diffrn_reflns_number             22865 
_diffrn_reflns_av_R_equivalents   0.0261 
_diffrn_reflns_av_sigmaI/netI     0.0450 
_diffrn_reflns_limit_h_min        -16 
_diffrn_reflns_limit_h_max        16 
_diffrn_reflns_limit_k_min        -18 
_diffrn_reflns_limit_k_max        18 
_diffrn_reflns_limit_l_min        -21 
_diffrn_reflns_limit_l_max        22 
_diffrn_reflns_theta_min          1.34 
_diffrn_reflns_theta_max          28.28 
_reflns_number_total              11629 
_reflns_number_gt                 9231 
_reflns_threshold_expression      >2sigma(I) 
  
_computing_data_collection        'Bruker SMART' 
_computing_cell_refinement        'Bruker SMART' 
_computing_data_reduction         'Bruker SAINT' 
_computing_structure_solution     'SHELXS-97 (Sheldrick, 1990)' 
_computing_structure_refinement   'SHELXL-97 (Sheldrick, 1997)' 
_computing_molecular_graphics     'Bruker SHELXTL' 
_computing_publication_material   'Bruker SHELXTL' 
  
_refine_special_details 
; 
 Refinement of F^2^ against ALL reflections.  The weighted R-factor wR and 
 goodness of fit S are based on F^2^, conventional R-factors R are based 
 on F, with F set to zero for negative F^2^. The threshold expression of 
 F^2^ > 2sigma(F^2^) is used only for calculating R-factors(gt) etc. and is 
 not relevant to the choice of reflections for refinement.  R-factors based 
 on F^2^ are statistically about twice as large as those based on F, and R- 
 factors based on ALL data will be even larger. 
; 
  
_refine_ls_structure_factor_coef  Fsqd 
_refine_ls_matrix_type            full 
_refine_ls_weighting_scheme       calc 
_refine_ls_weighting_details 
 'calc w=1/[\s^2^(Fo^2^)+(0.0954P)^2^+1.2015P] where P=(Fo^2^+2Fc^2^)/3' 
_atom_sites_solution_primary      direct 
_atom_sites_solution_secondary    difmap 
_atom_sites_solution_hydrogens    geom 
_refine_ls_hydrogen_treatment     mixed 
_refine_ls_extinction_method      none 
_refine_ls_extinction_coef        ? 
_refine_ls_number_reflns          11629 
_refine_ls_number_parameters      655 
_refine_ls_number_restraints      452 
_refine_ls_R_factor_all           0.0862 
_refine_ls_R_factor_gt            0.0673 
_refine_ls_wR_factor_ref          0.1827 
_refine_ls_wR_factor_gt           0.1687 
_refine_ls_goodness_of_fit_ref    1.104 
_refine_ls_restrained_S_all       1.088 
_refine_ls_shift/su_max           0.999 
_refine_ls_shift/su_mean          0.031 
  
loop_ 
 _atom_site_label 
 _atom_site_type_symbol 
 _atom_site_fract_x 
 _atom_site_fract_y 
 _atom_site_fract_z 
 _atom_site_U_iso_or_equiv 
 _atom_site_adp_type 
 _atom_site_occupancy 
 _atom_site_symmetry_multiplicity 
 _atom_site_calc_flag 
 _atom_site_refinement_flags 
 _atom_site_disorder_assembly 
 _atom_site_disorder_group 
Co1 Co 0.16511(3) 0.07241(3) 0.06408(2) 0.02768(12) Uani 1 1 d . . . 
O1 O 0.12996(18) -0.07713(15) 0.02530(13) 0.0362(5) Uani 1 1 d U . . 
O3 O 0.31865(19) 0.14046(17) 0.06191(14) 0.0402(5) Uani 1 1 d U . . 
O4 O 0.19838(18) 0.10833(17) -0.07224(14) 0.0407(5) Uani 1 1 d U . . 
O5 O 0.5769(2) 0.31994(17) 0.47995(15) 0.0459(5) Uani 1 1 d U . . 
O6 O 0.5756(2) 0.13900(18) 0.47018(15) 0.0462(6) Uani 1 1 d U . . 
N1 N 0.2241(2) 0.09915(19) 0.19959(16) 0.0329(5) Uani 1 1 d U . . 
H1A H 0.1607 0.0813 0.2181 0.039 Uiso 1 1 calc R . . 
N2 N 0.4218(2) 0.17537(19) 0.36150(16) 0.0336(5) Uani 1 1 d U . . 
N3 N 0.2017(2) 0.3127(2) 0.70691(18) 0.0425(6) Uani 1 1 d U . . 
S1 S 0.51319(7) 0.21316(6) 0.46309(5) 0.03648(18) Uani 1 1 d U . . 
C1 C 0.3806(3) 0.2805(2) 0.56308(18) 0.0343(6) Uani 1 1 d U . . 
C2 C 0.3980(3) 0.2071(2) -0.03590(19) 0.0345(6) Uani 1 1 d U . . 
C3 C 0.3028(3) 0.0376(2) 0.22704(19) 0.0359(6) Uani 1 1 d U . . 
H3A H 0.3651 0.0509 0.2014 0.043 Uiso 1 1 calc R . . 
H3B H 0.2581 -0.0373 0.2034 0.043 Uiso 1 1 calc R . . 
C4 C 0.3576(3) 0.0629(2) 0.32546(19) 0.0390(7) Uani 1 1 d U . . 
H4A H 0.2964 0.0445 0.3514 0.047 Uiso 1 1 calc R . . 
H4B H 0.4117 0.0219 0.3405 0.047 Uiso 1 1 calc R . . 
C5 C 0.4269(3) 0.2009(2) 0.53158(19) 0.0358(6) Uani 1 1 d U . . 
C6 C 0.3091(3) 0.2578(2) 0.61398(19) 0.0356(6) Uani 1 1 d U . . 
C7 C 0.2959(3) 0.1460(2) -0.0167(2) 0.0331(6) Uani 1 1 d U . . 
C8 C 0.2780(3) 0.1559(2) 0.6244(2) 0.0403(7) Uani 1 1 d U . . 
H8 H 0.2267 0.1393 0.6558 0.048 Uiso 1 1 calc R . . 
C9 C 0.3978(3) 0.1048(2) 0.5459(2) 0.0419(7) Uani 1 1 d U . . 
H9 H 0.4306 0.0538 0.5254 0.050 Uiso 1 1 calc R . . 
C10 C 0.2880(3) 0.2120(2) 0.2398(2) 0.0407(7) Uani 1 1 d U . . 
H10A H 0.2330 0.2523 0.2252 0.049 Uiso 1 1 calc R . . 
H10B H 0.3489 0.2324 0.2139 0.049 Uiso 1 1 calc R . . 
C11 C 0.3205(3) 0.0814(2) 0.5903(2) 0.0454(8) Uani 1 1 d U . . 
H11 H 0.2972 0.0134 0.5968 0.054 Uiso 1 1 calc R . . 
C12 C 0.3446(3) 0.2399(2) 0.33860(19) 0.0403(7) Uani 1 1 d U . . 
H12A H 0.3907 0.3145 0.3615 0.048 Uiso 1 1 calc R . . 
H12B H 0.2839 0.2276 0.3658 0.048 Uiso 1 1 calc R . . 
C50 C 0.0295(3) -0.2548(2) -0.2041(2) 0.0377(7) Uani 1 1 d U . . 
C51 C 0.4070(3) 0.0422(3) -0.1301(2) 0.0389(7) Uani 1 1 d U . . 
C52 C 0.3994(3) 0.3795(2) 0.5445(2) 0.0388(7) Uani 1 1 d U . . 
H52 H 0.4492 0.3978 0.5125 0.047 Uiso 1 1 calc R . . 
C53 C 0.0935(2) -0.3040(2) 0.0232(2) 0.0343(6) Uani 1 1 d U . . 
C54 C 0.2027(3) -0.2220(3) 0.2720(2) 0.0441(8) Uani 1 1 d U . . 
H54 H 0.2643 -0.2274 0.3184 0.053 Uiso 1 1 calc R . . 
C55 C 0.2634(3) 0.3354(2) 0.6501(2) 0.0381(7) Uani 1 1 d U . . 
C56 C 0.0658(2) -0.2563(2) -0.04519(19) 0.0308(6) Uani 1 1 d U . . 
C57 C 0.0808(3) -0.1494(3) -0.1927(2) 0.0392(7) Uani 1 1 d U . . 
H57 H 0.1306 -0.1063 -0.1359 0.047 Uiso 1 1 calc R . . 
C58 C 0.3456(3) 0.4475(2) 0.5730(2) 0.0435(8) Uani 1 1 d U . . 
H58 H 0.3543 0.5109 0.5570 0.052 Uiso 1 1 calc R . . 
C59 C 0.1042(3) -0.2561(2) 0.1155(2) 0.0339(6) Uani 1 1 d U . . 
C60 C 0.1085(3) -0.4019(3) 0.0024(2) 0.0437(7) Uani 1 1 d U . . 
H60 H 0.1269 -0.4357 0.0472 0.052 Uiso 1 1 calc R . . 
C61 C 0.0268(3) -0.2065(2) 0.1354(2) 0.0356(6) Uani 1 1 d U . . 
H61 H -0.0343 -0.2005 0.0891 0.043 Uiso 1 1 calc R . . 
C62 C 0.0602(3) -0.1061(3) -0.2632(2) 0.0458(8) Uani 1 1 d U . . 
H62 H 0.0956 -0.0338 -0.2533 0.055 Uiso 1 1 calc R . . 
C63 C 0.0450(2) -0.1533(2) -0.02519(17) 0.0298(6) Uani 1 1 d U . . 
C64 C 0.2434(3) 0.4119(2) 0.1092(2) 0.0417(7) Uani 1 1 d U . . 
H64 H 0.1623 0.4029 0.0950 0.050 Uiso 1 1 calc R . . 
C65 C 0.1929(3) -0.2626(2) 0.1853(2) 0.0390(7) Uani 1 1 d U . . 
H65 H 0.2477 -0.2952 0.1736 0.047 Uiso 1 1 calc R . . 
C66 C 0.2781(3) 0.4258(2) 0.6251(2) 0.0428(7) Uani 1 1 d U . . 
H66 H 0.2416 0.4746 0.6437 0.051 Uiso 1 1 calc R . . 
C67 C 0.3842(3) -0.0278(3) -0.0817(2) 0.0413(7) Uani 1 1 d U . . 
H67 H 0.3877 -0.0023 -0.0231 0.050 Uiso 1 1 calc R . . 
C68 C 0.4453(3) 0.3151(2) 0.0054(2) 0.0377(7) Uani 1 1 d U . . 
C69 C 0.0712(3) -0.4022(3) -0.1481(2) 0.0462(8) Uani 1 1 d U . . 
H69 H 0.0648 -0.4360 -0.2059 0.055 Uiso 1 1 calc R . . 
C70 C 0.5848(3) 0.3238(3) -0.0683(3) 0.0569(10) Uani 1 1 d U . . 
H70 H 0.6472 0.3637 -0.0813 0.068 Uiso 1 1 calc R . . 
C71 C 0.1327(4) 0.3805(3) 0.7229(3) 0.0608(10) Uani 1 1 d U . . 
H71A H 0.1848 0.4501 0.7582 0.091 Uiso 1 1 calc R . . 
H71B H 0.0835 0.3524 0.7548 0.091 Uiso 1 1 calc R . . 
H71C H 0.0834 0.3848 0.6667 0.091 Uiso 1 1 calc R . . 
C72 C 0.1246(3) -0.1742(2) 0.2918(2) 0.0413(7) Uani 1 1 d U . . 
C73 C 0.5411(3) 0.2171(3) -0.1067(3) 0.0519(9) Uani 1 1 d U . . 
H73 H 0.5757 0.1847 -0.1438 0.062 Uiso 1 1 calc R . . 
C74 C 0.0970(3) -0.4506(3) -0.0825(3) 0.0509(9) Uani 1 1 d U . . 
H74 H 0.1070 -0.5175 -0.0955 0.061 Uiso 1 1 calc R . . 
C75 C 0.3205(3) 0.4750(2) 0.1912(2) 0.0428(7) Uani 1 1 d U . . 
C76 C 0.2822(3) 0.3623(2) 0.0483(2) 0.0384(7) Uani 1 1 d U . . 
H76 H 0.2280 0.3218 -0.0080 0.046 Uiso 1 1 calc R . . 
C77 C 0.0545(3) -0.3049(2) -0.1314(2) 0.0368(7) Uani 1 1 d U . . 
C78 C 0.4467(3) 0.1566(3) -0.0914(2) 0.0394(7) Uani 1 1 d U . . 
C79 C 0.3997(3) 0.3706(2) 0.0679(2) 0.0377(7) Uani 1 1 d U . . 
C80 C 0.5401(3) 0.3721(3) -0.0126(3) 0.0497(8) Uani 1 1 d U . . 
H80 H 0.5731 0.4448 0.0144 0.060 Uiso 1 1 calc R . . 
C81 C 0.4371(3) 0.4861(3) 0.2087(2) 0.0485(8) Uani 1 1 d U . . 
H81 H 0.4918 0.5302 0.2636 0.058 Uiso 1 1 calc R . . 
C82 C 0.4770(3) 0.4355(3) 0.1492(2) 0.0471(8) Uani 1 1 d U . . 
H82 H 0.5581 0.4450 0.1637 0.057 Uiso 1 1 calc R . . 
C83 C 0.2719(3) 0.3017(3) 0.7907(2) 0.0519(9) Uani 1 1 d U . . 
H83A H 0.3271 0.2654 0.7805 0.078 Uiso 1 1 calc R . . 
H83B H 0.2205 0.2617 0.8155 0.078 Uiso 1 1 calc R . . 
H83C H 0.3148 0.3708 0.8318 0.078 Uiso 1 1 calc R . . 
O2 O -0.05645(18) -0.15164(16) -0.06072(13) 0.0362(5) Uani 1 1 d U . . 
C85 C 0.0375(3) -0.1658(2) 0.2218(2) 0.0398(7) Uani 1 1 d U . . 
H85 H -0.0159 -0.1314 0.2336 0.048 Uiso 1 1 calc R . . 
C86 C 0.3567(3) -0.1336(3) -0.1175(2) 0.0501(8) Uani 1 1 d U . . 
H86 H 0.3420 -0.1795 -0.0829 0.060 Uiso 1 1 calc R . . 
C87 C -0.0634(4) -0.2705(3) -0.3583(2) 0.0574(10) Uani 1 1 d U . . 
H87 H -0.1141 -0.3129 -0.4151 0.069 Uiso 1 1 calc R . . 
C88 C 0.2802(4) 0.5273(3) 0.2603(3) 0.0606(10) Uani 1 1 d U . . 
H88A H 0.2868 0.4917 0.3066 0.091 Uiso 1 1 calc R . . 
H88B H 0.1987 0.5241 0.2335 0.091 Uiso 1 1 calc R . . 
H88C H 0.3287 0.6002 0.2856 0.091 Uiso 1 1 calc R . . 
C89 C 0.3991(3) 0.0008(3) -0.2158(2) 0.0490(8) Uani 1 1 d U . . 
H89 H 0.4133 0.0462 -0.2508 0.059 Uiso 1 1 calc R . . 
C90 C 0.3712(3) -0.1047(3) -0.2509(3) 0.0553(9) Uani 1 1 d U . . 
H90 H 0.3663 -0.1302 -0.3099 0.066 Uiso 1 1 calc R . . 
C91 C 0.1324(4) -0.1344(3) 0.3860(2) 0.0572(10) Uani 1 1 d U . . 
H91A H 0.2032 -0.1411 0.4259 0.086 Uiso 1 1 calc R . . 
H91B H 0.0639 -0.1754 0.3951 0.086 Uiso 1 1 calc R . . 
H91C H 0.1353 -0.0612 0.3981 0.086 Uiso 1 1 calc R . . 
C92 C -0.0444(3) -0.3142(3) -0.2890(2) 0.0497(8) Uani 1 1 d U . . 
H92 H -0.0821 -0.3861 -0.2991 0.060 Uiso 1 1 calc R . . 
C93 C -0.0103(3) -0.1658(3) -0.3468(2) 0.0509(9) Uani 1 1 d U . . 
C94 C 0.3503(3) -0.1745(3) -0.2033(3) 0.0564(10) Uani 1 1 d U . . 
C95 C -0.0294(5) -0.1205(4) -0.4237(3) 0.0782(14) Uani 1 1 d U . . 
H95A H -0.1083 -0.1144 -0.4417 0.117 Uiso 1 1 calc R . . 
H95B H -0.0200 -0.1661 -0.4728 0.117 Uiso 1 1 calc R . . 
H95C H 0.0277 -0.0515 -0.4069 0.117 Uiso 1 1 calc R . . 
C96 C 0.3168(5) -0.2902(3) -0.2436(4) 0.0863(16) Uani 1 1 d U . . 
H96A H 0.2406 -0.3137 -0.2907 0.129 Uiso 1 1 calc R . . 
H96B H 0.3126 -0.3264 -0.1984 0.129 Uiso 1 1 calc R . . 
H96C H 0.3753 -0.3057 -0.2679 0.129 Uiso 1 1 calc R . . 
O50 O 0.9968(16) 0.4981(11) 0.5289(7) 0.154(5) Uani 0.50 1 d PDU . . 
C98 C 0.9086(13) 0.3845(14) 0.4888(8) 0.261(7) Uani 1 1 d DU . . 
C99 C 0.8628(8) 0.4051(8) 0.5610(11) 0.263(9) Uani 1 1 d DU . . 
  
loop_ 
 _atom_site_aniso_label 
 _atom_site_aniso_U_11 
 _atom_site_aniso_U_22 
 _atom_site_aniso_U_33 
 _atom_site_aniso_U_23 
 _atom_site_aniso_U_13 
 _atom_site_aniso_U_12 
Co1 0.0288(2) 0.0270(2) 0.0270(2) 0.00764(14) 0.00919(15) 0.00850(15) 
O1 0.0388(11) 0.0289(10) 0.0358(11) 0.0066(9) 0.0087(9) 0.0082(9) 
O3 0.0411(12) 0.0396(12) 0.0430(12) 0.0148(10) 0.0202(10) 0.0082(10) 
O4 0.0351(12) 0.0388(12) 0.0429(12) 0.0065(10) 0.0108(10) 0.0092(10) 
O5 0.0431(13) 0.0398(12) 0.0425(13) 0.0071(10) 0.0077(10) 0.0030(10) 
O6 0.0448(13) 0.0519(14) 0.0406(13) 0.0125(11) 0.0074(10) 0.0220(11) 
N1 0.0336(13) 0.0335(13) 0.0314(12) 0.0102(10) 0.0118(10) 0.0086(10) 
N2 0.0382(13) 0.0301(12) 0.0293(12) 0.0081(10) 0.0062(10) 0.0117(11) 
N3 0.0444(15) 0.0385(14) 0.0424(15) 0.0087(12) 0.0144(12) 0.0120(12) 
S1 0.0370(4) 0.0364(4) 0.0307(4) 0.0079(3) 0.0057(3) 0.0103(3) 
C1 0.0425(16) 0.0262(14) 0.0259(14) 0.0058(11) 0.0039(12) 0.0064(12) 
C2 0.0322(15) 0.0391(16) 0.0327(15) 0.0127(12) 0.0120(12) 0.0086(12) 
C3 0.0418(16) 0.0289(14) 0.0337(15) 0.0095(12) 0.0086(13) 0.0096(13) 
C4 0.0472(18) 0.0296(15) 0.0339(16) 0.0109(12) 0.0054(13) 0.0094(13) 
C5 0.0444(17) 0.0319(15) 0.0268(14) 0.0078(11) 0.0073(12) 0.0103(13) 
C6 0.0430(17) 0.0292(14) 0.0288(14) 0.0069(11) 0.0062(12) 0.0090(13) 
C7 0.0340(15) 0.0273(14) 0.0387(16) 0.0060(12) 0.0168(13) 0.0077(12) 
C8 0.0512(19) 0.0307(15) 0.0357(16) 0.0117(12) 0.0121(14) 0.0079(14) 
C9 0.063(2) 0.0325(16) 0.0333(16) 0.0116(13) 0.0145(15) 0.0209(15) 
C10 0.057(2) 0.0303(15) 0.0301(15) 0.0076(12) 0.0049(14) 0.0171(14) 
C11 0.068(2) 0.0289(15) 0.0361(17) 0.0118(13) 0.0115(16) 0.0141(15) 
C12 0.0512(19) 0.0374(16) 0.0287(15) 0.0048(12) 0.0065(13) 0.0198(15) 
C50 0.0360(16) 0.0418(17) 0.0366(16) 0.0054(13) 0.0164(13) 0.0141(13) 
C51 0.0337(15) 0.0480(18) 0.0383(16) 0.0138(14) 0.0145(13) 0.0145(14) 
C52 0.0524(19) 0.0283(15) 0.0315(15) 0.0087(12) 0.0118(14) 0.0078(13) 
C53 0.0286(14) 0.0303(14) 0.0419(16) 0.0077(12) 0.0130(12) 0.0061(12) 
C54 0.0456(18) 0.0449(18) 0.0419(18) 0.0193(15) 0.0120(15) 0.0122(15) 
C55 0.0410(17) 0.0323(15) 0.0324(15) 0.0056(12) 0.0046(13) 0.0085(13) 
C56 0.0263(13) 0.0288(14) 0.0362(15) 0.0059(11) 0.0121(12) 0.0074(11) 
C57 0.0357(16) 0.0449(18) 0.0321(15) 0.0051(13) 0.0106(13) 0.0091(14) 
C58 0.058(2) 0.0269(15) 0.0412(18) 0.0104(13) 0.0108(15) 0.0116(14) 
C59 0.0330(15) 0.0277(14) 0.0414(16) 0.0117(12) 0.0144(13) 0.0067(12) 
C60 0.0446(18) 0.0371(17) 0.052(2) 0.0154(15) 0.0173(15) 0.0147(14) 
C61 0.0285(14) 0.0364(16) 0.0384(16) 0.0100(13) 0.0109(12) 0.0047(12) 
C62 0.0434(18) 0.054(2) 0.0414(18) 0.0124(15) 0.0157(15) 0.0160(16) 
C63 0.0332(14) 0.0324(14) 0.0250(13) 0.0084(11) 0.0114(11) 0.0104(12) 
C64 0.0344(16) 0.0330(16) 0.056(2) 0.0147(14) 0.0132(15) 0.0080(13) 
C65 0.0394(16) 0.0393(17) 0.0448(18) 0.0173(14) 0.0174(14) 0.0158(14) 
C66 0.0491(19) 0.0306(15) 0.0449(18) 0.0073(13) 0.0110(15) 0.0145(14) 
C67 0.0377(17) 0.0473(18) 0.0386(17) 0.0132(14) 0.0096(14) 0.0158(14) 
C68 0.0301(15) 0.0370(16) 0.0440(17) 0.0134(13) 0.0117(13) 0.0063(12) 
C69 0.055(2) 0.0403(18) 0.0470(19) 0.0054(15) 0.0248(17) 0.0185(16) 
C70 0.044(2) 0.055(2) 0.080(3) 0.027(2) 0.037(2) 0.0053(17) 
C71 0.062(2) 0.047(2) 0.083(3) 0.016(2) 0.038(2) 0.0200(19) 
C72 0.0452(18) 0.0360(16) 0.0384(17) 0.0082(13) 0.0166(14) 0.0035(14) 
C73 0.0449(19) 0.058(2) 0.062(2) 0.0186(18) 0.0320(18) 0.0140(17) 
C74 0.064(2) 0.0311(16) 0.062(2) 0.0067(15) 0.0270(19) 0.0210(16) 
C75 0.0523(19) 0.0318(16) 0.0488(19) 0.0167(14) 0.0202(16) 0.0135(14) 
C76 0.0327(15) 0.0303(15) 0.0424(17) 0.0071(13) 0.0068(13) 0.0017(12) 
C77 0.0352(15) 0.0361(16) 0.0380(16) 0.0042(13) 0.0153(13) 0.0104(13) 
C78 0.0375(16) 0.0462(18) 0.0388(17) 0.0161(14) 0.0168(14) 0.0127(14) 
C79 0.0359(16) 0.0306(15) 0.0428(17) 0.0117(13) 0.0118(13) 0.0039(12) 
C80 0.0398(18) 0.0412(18) 0.068(2) 0.0171(17) 0.0225(17) 0.0050(15) 
C81 0.0465(19) 0.0409(18) 0.0421(19) 0.0027(14) 0.0046(15) 0.0049(15) 
C82 0.0326(16) 0.0440(19) 0.053(2) 0.0085(16) 0.0082(15) 0.0033(14) 
C83 0.053(2) 0.058(2) 0.0394(19) 0.0112(16) 0.0156(16) 0.0095(18) 
O2 0.0341(11) 0.0405(12) 0.0348(11) 0.0068(9) 0.0105(9) 0.0176(9) 
C85 0.0372(16) 0.0380(16) 0.0456(18) 0.0094(14) 0.0193(14) 0.0098(13) 
C86 0.0470(19) 0.049(2) 0.056(2) 0.0202(17) 0.0127(17) 0.0201(16) 
C87 0.060(2) 0.069(3) 0.0328(18) 0.0016(17) 0.0106(16) 0.017(2) 
C88 0.072(3) 0.054(2) 0.060(2) 0.0145(19) 0.026(2) 0.023(2) 
C89 0.050(2) 0.060(2) 0.0443(19) 0.0160(16) 0.0218(16) 0.0214(17) 
C90 0.056(2) 0.064(2) 0.052(2) 0.0084(18) 0.0268(18) 0.0262(19) 
C91 0.072(3) 0.055(2) 0.0413(19) 0.0110(16) 0.0196(19) 0.015(2) 
C92 0.054(2) 0.047(2) 0.0407(18) 0.0012(15) 0.0168(16) 0.0110(16) 
C93 0.051(2) 0.067(2) 0.0393(18) 0.0154(17) 0.0172(16) 0.0244(18) 
C94 0.053(2) 0.054(2) 0.063(2) 0.0058(18) 0.0191(19) 0.0277(18) 
C95 0.101(4) 0.088(3) 0.044(2) 0.024(2) 0.015(2) 0.034(3) 
C96 0.102(4) 0.049(2) 0.099(4) -0.002(2) 0.024(3) 0.038(3) 
O50 0.264(15) 0.133(7) 0.117(9) 0.053(8) 0.078(11) 0.124(9) 
C98 0.229(15) 0.43(2) 0.149(10) 0.109(13) 0.025(9) 0.180(15) 
C99 0.084(6) 0.129(8) 0.47(2) 0.000(11) -0.016(10) 0.050(5) 
  
_geom_special_details 
; 
 All esds (except the esd in the dihedral angle between two l.s. planes) 
 are estimated using the full covariance matrix.  The cell esds are taken 
 into account individually in the estimation of esds in distances, angles 
 and torsion angles; correlations between esds in cell parameters are only 
 used when they are defined by crystal symmetry.  An approximate (isotropic) 
 treatment of cell esds is used for estimating esds involving l.s. planes. 
; 
  
loop_ 
 _geom_bond_atom_site_label_1 
 _geom_bond_atom_site_label_2 
 _geom_bond_distance 
 _geom_bond_site_symmetry_2 
 _geom_bond_publ_flag 
Co1 O2 1.934(2) 2 ? 
Co1 O1 1.936(2) . ? 
Co1 O3 1.953(2) . ? 
Co1 N1 2.075(2) . ? 
O1 C63 1.252(3) . ? 
O3 C7 1.269(4) . ? 
O4 C7 1.221(4) . ? 
O5 S1 1.429(2) . ? 
O6 S1 1.429(2) . ? 
N1 C3 1.479(4) . ? 
N1 C10 1.488(4) . ? 
N2 C4 1.480(4) . ? 
N2 C12 1.482(4) . ? 
N2 S1 1.641(2) . ? 
N3 C55 1.413(4) . ? 
N3 C71 1.453(5) . ? 
N3 C83 1.470(5) . ? 
S1 C5 1.782(3) . ? 
C1 C6 1.419(4) . ? 
C1 C52 1.434(4) . ? 
C1 C5 1.437(4) . ? 
C2 C78 1.405(4) . ? 
C2 C68 1.412(4) . ? 
C2 C7 1.512(4) . ? 
C3 C4 1.507(4) . ? 
C5 C9 1.372(4) . ? 
C6 C8 1.423(4) . ? 
C6 C55 1.437(4) . ? 
C8 C11 1.366(5) . ? 
C9 C11 1.392(5) . ? 
C10 C12 1.512(4) . ? 
C50 C57 1.394(5) . ? 
C50 C92 1.400(5) . ? 
C50 C77 1.489(4) . ? 
C51 C89 1.387(5) . ? 
C51 C67 1.393(5) . ? 
C51 C78 1.484(5) . ? 
C52 C58 1.366(5) . ? 
C53 C60 1.396(4) . ? 
C53 C56 1.411(4) . ? 
C53 C59 1.496(4) . ? 
C54 C72 1.383(5) . ? 
C54 C65 1.393(5) . ? 
C55 C66 1.372(4) . ? 
C56 C77 1.405(4) . ? 
C56 C63 1.494(4) . ? 
C57 C62 1.394(5) . ? 
C58 C66 1.396(5) . ? 
C59 C61 1.389(4) . ? 
C59 C65 1.390(4) . ? 
C60 C74 1.385(5) . ? 
C61 C85 1.386(4) . ? 
C62 C93 1.377(5) . ? 
C63 O2 1.251(3) . ? 
C64 C76 1.375(5) . ? 
C64 C75 1.392(5) . ? 
C67 C86 1.381(5) . ? 
C68 C80 1.407(4) . ? 
C68 C79 1.490(5) . ? 
C69 C74 1.378(5) . ? 
C69 C77 1.392(4) . ? 
C70 C80 1.358(5) . ? 
C70 C73 1.388(5) . ? 
C72 C85 1.391(5) . ? 
C72 C91 1.515(5) . ? 
C73 C78 1.399(4) . ? 
C75 C81 1.377(5) . ? 
C75 C88 1.505(5) . ? 
C76 C79 1.391(4) . ? 
C79 C82 1.392(5) . ? 
C81 C82 1.374(5) . ? 
O2 Co1 1.934(2) 2 ? 
C86 C94 1.393(5) . ? 
C87 C92 1.380(5) . ? 
C87 C93 1.388(6) . ? 
C89 C90 1.375(5) . ? 
C90 C94 1.378(6) . ? 
C93 C95 1.504(5) . ? 
C94 C96 1.509(6) . ? 
O50 O50 0.991(19) 2_766 ? 
O50 C98 1.577(9) . ? 
O50 C98 1.89(3) 2_766 ? 
C98 C99 1.474(9) . ? 
C98 O50 1.89(3) 2_766 ? 
  
loop_ 
 _geom_angle_atom_site_label_1 
 _geom_angle_atom_site_label_2 
 _geom_angle_atom_site_label_3 
 _geom_angle 
 _geom_angle_site_symmetry_1 
 _geom_angle_site_symmetry_3 
 _geom_angle_publ_flag 
O2 Co1 O1 127.83(9) 2 . ? 
O2 Co1 O3 118.09(9) 2 . ? 
O1 Co1 O3 109.76(9) . . ? 
O2 Co1 N1 95.51(9) 2 . ? 
O1 Co1 N1 101.22(9) . . ? 
O3 Co1 N1 93.63(10) . . ? 
C63 O1 Co1 137.3(2) . . ? 
C7 O3 Co1 102.57(19) . . ? 
C3 N1 C10 109.6(2) . . ? 
C3 N1 Co1 111.03(18) . . ? 
C10 N1 Co1 107.95(17) . . ? 
C4 N2 C12 111.7(2) . . ? 
C4 N2 S1 116.40(19) . . ? 
C12 N2 S1 116.04(19) . . ? 
C55 N3 C71 115.3(3) . . ? 
C55 N3 C83 114.9(3) . . ? 
C71 N3 C83 109.9(3) . . ? 
O5 S1 O6 118.81(15) . . ? 
O5 S1 N2 106.99(13) . . ? 
O6 S1 N2 106.06(13) . . ? 
O5 S1 C5 110.12(15) . . ? 
O6 S1 C5 107.64(14) . . ? 
N2 S1 C5 106.52(14) . . ? 
C6 C1 C52 118.2(3) . . ? 
C6 C1 C5 117.4(3) . . ? 
C52 C1 C5 124.3(3) . . ? 
C78 C2 C68 121.1(3) . . ? 
C78 C2 C7 120.5(3) . . ? 
C68 C2 C7 118.4(3) . . ? 
N1 C3 C4 112.8(2) . . ? 
N2 C4 C3 109.3(2) . . ? 
C9 C5 C1 121.3(3) . . ? 
C9 C5 S1 114.7(2) . . ? 
C1 C5 S1 123.8(2) . . ? 
C1 C6 C8 119.2(3) . . ? 
C1 C6 C55 120.2(3) . . ? 
C8 C6 C55 120.6(3) . . ? 
O4 C7 O3 123.0(3) . . ? 
O4 C7 C2 122.1(3) . . ? 
O3 C7 C2 114.8(3) . . ? 
C11 C8 C6 121.1(3) . . ? 
C5 C9 C11 120.4(3) . . ? 
N1 C10 C12 113.0(3) . . ? 
C8 C11 C9 120.4(3) . . ? 
N2 C12 C10 109.5(2) . . ? 
C57 C50 C92 116.9(3) . . ? 
C57 C50 C77 122.6(3) . . ? 
C92 C50 C77 120.4(3) . . ? 
C89 C51 C67 117.2(3) . . ? 
C89 C51 C78 120.1(3) . . ? 
C67 C51 C78 122.6(3) . . ? 
C58 C52 C1 119.9(3) . . ? 
C60 C53 C56 117.8(3) . . ? 
C60 C53 C59 118.9(3) . . ? 
C56 C53 C59 123.3(3) . . ? 
C72 C54 C65 121.3(3) . . ? 
C66 C55 N3 123.4(3) . . ? 
C66 C55 C6 118.4(3) . . ? 
N3 C55 C6 118.1(3) . . ? 
C77 C56 C53 121.4(3) . . ? 
C77 C56 C63 119.7(3) . . ? 
C53 C56 C63 118.8(3) . . ? 
C62 C57 C50 121.1(3) . . ? 
C52 C58 C66 121.4(3) . . ? 
C61 C59 C65 117.7(3) . . ? 
C61 C59 C53 122.6(3) . . ? 
C65 C59 C53 119.7(3) . . ? 
C74 C60 C53 121.2(3) . . ? 
C85 C61 C59 121.0(3) . . ? 
C93 C62 C57 121.4(3) . . ? 
O2 C63 O1 126.2(3) . . ? 
O2 C63 C56 116.4(2) . . ? 
O1 C63 C56 117.4(3) . . ? 
C76 C64 C75 121.2(3) . . ? 
C59 C65 C54 121.1(3) . . ? 
C55 C66 C58 121.3(3) . . ? 
C86 C67 C51 121.1(3) . . ? 
C80 C68 C2 118.5(3) . . ? 
C80 C68 C79 118.9(3) . . ? 
C2 C68 C79 122.6(3) . . ? 
C74 C69 C77 121.4(3) . . ? 
C80 C70 C73 121.3(3) . . ? 
C54 C72 C85 117.5(3) . . ? 
C54 C72 C91 121.1(3) . . ? 
C85 C72 C91 121.5(3) . . ? 
C70 C73 C78 120.7(3) . . ? 
C69 C74 C60 120.1(3) . . ? 
C81 C75 C64 117.3(3) . . ? 
C81 C75 C88 120.3(3) . . ? 
C64 C75 C88 122.4(3) . . ? 
C64 C76 C79 121.1(3) . . ? 
C69 C77 C56 118.1(3) . . ? 
C69 C77 C50 119.3(3) . . ? 
C56 C77 C50 122.6(3) . . ? 
C73 C78 C2 118.0(3) . . ? 
C73 C78 C51 118.7(3) . . ? 
C2 C78 C51 123.2(3) . . ? 
C76 C79 C82 117.6(3) . . ? 
C76 C79 C68 123.0(3) . . ? 
C82 C79 C68 119.4(3) . . ? 
C70 C80 C68 120.4(3) . . ? 
C82 C81 C75 122.1(3) . . ? 
C81 C82 C79 120.7(3) . . ? 
C63 O2 Co1 146.1(2) . 2 ? 
C61 C85 C72 121.5(3) . . ? 
C67 C86 C94 121.4(4) . . ? 
C92 C87 C93 121.5(3) . . ? 
C90 C89 C51 121.3(3) . . ? 
C89 C90 C94 122.1(4) . . ? 
C87 C92 C50 121.3(4) . . ? 
C62 C93 C87 117.7(3) . . ? 
C62 C93 C95 121.7(4) . . ? 
C87 C93 C95 120.6(4) . . ? 
C90 C94 C86 116.9(4) . . ? 
C90 C94 C96 121.4(4) . . ? 
C86 C94 C96 121.6(4) . . ? 
O50 O50 C98 92(2) 2_766 . ? 
O50 O50 C98 56.3(15) 2_766 2_766 ? 
C98 O50 C98 148.5(8) . 2_766 ? 
C99 C98 O50 88.3(12) . . ? 
C99 C98 O50 116.4(13) . 2_766 ? 
O50 C98 O50 31.5(8) . 2_766 ? 
  
_diffrn_measured_fraction_theta_max    0.914 
_diffrn_reflns_theta_full              28.28 
_diffrn_measured_fraction_theta_full   0.914 
_refine_diff_density_max    0.929 
_refine_diff_density_min   -0.317 
_refine_diff_density_rms    0.110 


#===END


  
data_Compound4 
  
_audit_creation_method            SHELXL-97 
_chemical_name_systematic 
; 
 ? 
; 
_chemical_name_common             ? 
_chemical_melting_point           ? 
_chemical_formula_moiety          ? 
_chemical_formula_sum 
 'C42 H34 Cl Co2 N4 O8' 
_chemical_formula_weight          876.04 
  
loop_ 
 _atom_type_symbol 
 _atom_type_description 
 _atom_type_scat_dispersion_real 
 _atom_type_scat_dispersion_imag 
 _atom_type_scat_source 
 'C'  'C'   0.0033   0.0016 
 'International Tables Vol C Tables 4.2.6.8 and 6.1.1.4' 
 'H'  'H'   0.0000   0.0000 
 'International Tables Vol C Tables 4.2.6.8 and 6.1.1.4' 
 'N'  'N'   0.0061   0.0033 
 'International Tables Vol C Tables 4.2.6.8 and 6.1.1.4' 
 'O'  'O'   0.0106   0.0060 
 'International Tables Vol C Tables 4.2.6.8 and 6.1.1.4' 
 'Co'  'Co'   0.3494   0.9721 
 'International Tables Vol C Tables 4.2.6.8 and 6.1.1.4' 
 'Cl'  'Cl'   0.1484   0.1585 
 'International Tables Vol C Tables 4.2.6.8 and 6.1.1.4' 
  
_symmetry_cell_setting            Triclinic 
_symmetry_space_group_name_H-M    P-1 
  
loop_ 
 _symmetry_equiv_pos_as_xyz 
 'x, y, z' 
 '-x, -y, -z' 
  
_cell_length_a                    11.9834(18) 
_cell_length_b                    12.9073(19) 
_cell_length_c                    14.474(2) 
_cell_angle_alpha                 71.121(2) 
_cell_angle_beta                  76.355(2) 
_cell_angle_gamma                 77.119(2) 
_cell_volume                      2032.2(5) 
_cell_formula_units_Z             2 
_cell_measurement_temperature     173(2) 
_cell_measurement_reflns_used     955 
_cell_measurement_theta_min       3.01 
_cell_measurement_theta_max       27.87 
  
_exptl_crystal_description        plate 
_exptl_crystal_colour             brown/burgandy 
_exptl_crystal_size_max           0.35 
_exptl_crystal_size_mid           0.2 
_exptl_crystal_size_min           0.1 
_exptl_crystal_density_meas       0 
_exptl_crystal_density_diffrn     1.432 
_exptl_crystal_density_method     'not measured' 
_exptl_crystal_F_000              898 
_exptl_absorpt_coefficient_mu     0.939 
_exptl_absorpt_correction_type    'sadabs' 
_exptl_absorpt_correction_T_min   0.851115 
_exptl_absorpt_correction_T_max   1.000000 
_exptl_absorpt_process_details    ? 
  
_exptl_special_details 
; 
 ? 
; 
  
_diffrn_ambient_temperature       173(2) 
_diffrn_radiation_wavelength      0.71073 
_diffrn_radiation_type            MoK\a 
_diffrn_radiation_source          'fine-focus sealed tube' 
_diffrn_radiation_monochromator   graphite 
_diffrn_measurement_device_type   'CCD area detector' 
_diffrn_measurement_method        'phi and omega scans' 
_diffrn_detector_area_resol_mean  ? 
_diffrn_standards_number          ? 
_diffrn_standards_interval_count  ? 
_diffrn_standards_interval_time   ? 
_diffrn_standards_decay_%         ? 
_diffrn_reflns_number             17868 
_diffrn_reflns_av_R_equivalents   0.0162 
_diffrn_reflns_av_sigmaI/netI     0.0267 
_diffrn_reflns_limit_h_min        -15 
_diffrn_reflns_limit_h_max        15 
_diffrn_reflns_limit_k_min        -17 
_diffrn_reflns_limit_k_max        17 
_diffrn_reflns_limit_l_min        -18 
_diffrn_reflns_limit_l_max        18 
_diffrn_reflns_theta_min          1.51 
_diffrn_reflns_theta_max          28.30 
_reflns_number_total              9120 
_reflns_number_gt                 7749 
_reflns_threshold_expression      >2sigma(I) 
  
_computing_data_collection        'Bruker SMART' 
_computing_cell_refinement        'Bruker SMART' 
_computing_data_reduction         'Bruker SAINT' 
_computing_structure_solution     'SHELXS-97 (Sheldrick, 1990)' 
_computing_structure_refinement   'SHELXL-97 (Sheldrick, 1997)' 
_computing_molecular_graphics     'Bruker SHELXTL' 
_computing_publication_material   'Bruker SHELXTL' 
  
_refine_special_details 
; 
 Refinement of F^2^ against ALL reflections.  The weighted R-factor wR and 
 goodness of fit S are based on F^2^, conventional R-factors R are based 
 on F, with F set to zero for negative F^2^. The threshold expression of 
 F^2^ > 2sigma(F^2^) is used only for calculating R-factors(gt) etc. and is 
 not relevant to the choice of reflections for refinement.  R-factors based 
 on F^2^ are statistically about twice as large as those based on F, and R- 
 factors based on ALL data will be even larger. 
; 
  
_refine_ls_structure_factor_coef  Fsqd 
_refine_ls_matrix_type            full 
_refine_ls_weighting_scheme       calc 
_refine_ls_weighting_details 
 'calc w=1/[\s^2^(Fo^2^)+(0.0660P)^2^+0.6136P] where P=(Fo^2^+2Fc^2^)/3' 
_atom_sites_solution_primary      direct 
_atom_sites_solution_secondary    difmap 
_atom_sites_solution_hydrogens    geom 
_refine_ls_hydrogen_treatment     mixed 
_refine_ls_extinction_method      none 
_refine_ls_extinction_coef        ? 
_refine_ls_number_reflns          9120 
_refine_ls_number_parameters      532 
_refine_ls_number_restraints      0 
_refine_ls_R_factor_all           0.0490 
_refine_ls_R_factor_gt            0.0402 
_refine_ls_wR_factor_ref          0.1130 
_refine_ls_wR_factor_gt           0.1042 
_refine_ls_goodness_of_fit_ref    1.079 
_refine_ls_restrained_S_all       1.079 
_refine_ls_shift/su_max           0.001 
_refine_ls_shift/su_mean          0.000 
  
loop_ 
 _atom_site_label 
 _atom_site_type_symbol 
 _atom_site_fract_x 
 _atom_site_fract_y 
 _atom_site_fract_z 
 _atom_site_U_iso_or_equiv 
 _atom_site_adp_type 
 _atom_site_occupancy 
 _atom_site_symmetry_multiplicity 
 _atom_site_calc_flag 
 _atom_site_refinement_flags 
 _atom_site_disorder_assembly 
 _atom_site_disorder_group 
Co1 Co 0.12402(2) 0.05774(2) 1.04376(2) 0.02993(8) Uani 1 1 d . . . 
Co2 Co 0.31317(2) 0.17160(2) 0.810826(19) 0.02922(8) Uani 1 1 d . . . 
O4 O 0.17399(11) 0.27816(11) 0.84290(10) 0.0281(3) Uani 1 1 d . . . 
O1 O 0.22019(11) 0.16088(11) 1.05031(9) 0.0279(3) Uani 1 1 d . . . 
O2 O 0.37636(11) 0.15691(11) 0.92944(10) 0.0293(3) Uani 1 1 d . . . 
O3 O 0.04417(11) 0.16919(11) 0.93931(10) 0.0306(3) Uani 1 1 d . . . 
C1 C 0.07277(16) 0.25984(15) 0.88289(13) 0.0257(4) Uani 1 1 d . . . 
C36 C 0.43779(17) 0.37452(15) 0.91187(15) 0.0302(4) Uani 1 1 d . . . 
C4 C -0.09759(16) 0.33748(15) 1.04139(14) 0.0277(4) Uani 1 1 d . . . 
C2 C -0.02463(15) 0.35531(15) 0.85853(14) 0.0254(4) Uani 1 1 d . . . 
C23 C 0.38748(15) 0.21608(16) 1.06515(14) 0.0266(4) Uani 1 1 d . . . 
C15 C 0.05152(16) 0.37738(16) 0.67565(14) 0.0277(4) Uani 1 1 d . . . 
C3 C -0.10788(15) 0.38656(16) 0.93487(14) 0.0273(4) Uani 1 1 d . . . 
N1 N 0.39427(16) 0.24014(17) 0.70807(14) 0.0421(4) Uani 1 1 d . . . 
C24 C 0.39186(16) 0.15925(17) 1.16522(14) 0.0293(4) Uani 1 1 d . . . 
C11 C -0.19984(17) 0.47176(17) 0.90981(15) 0.0317(4) Uani 1 1 d . . . 
H11A H -0.2564 0.4921 0.9598 0.038 Uiso 1 1 calc R . . 
C35 C 0.44376(16) 0.30876(16) 1.01680(15) 0.0292(4) Uani 1 1 d . . . 
C25 C 0.34277(17) 0.05460(17) 1.21654(14) 0.0307(4) Uani 1 1 d . . . 
C13 C -0.12435(17) 0.49722(17) 0.73663(15) 0.0336(4) Uani 1 1 d . . . 
H13A H -0.1293 0.5355 0.6708 0.040 Uiso 1 1 calc R . . 
C14 C -0.03233(16) 0.41085(16) 0.75878(14) 0.0275(4) Uani 1 1 d . . . 
C16 C 0.06762(19) 0.26962(17) 0.66980(15) 0.0347(4) Uani 1 1 d . . . 
H16A H 0.0263 0.2180 0.7185 0.042 Uiso 1 1 calc R . . 
O8 O -0.0140(2) -0.01440(16) 1.22931(15) 0.0678(6) Uani 1 1 d . . . 
N3 N 0.19873(18) -0.06041(16) 1.02436(15) 0.0446(5) Uani 1 1 d . . . 
C34 C 0.50351(17) 0.34321(18) 1.07045(17) 0.0348(4) Uani 1 1 d . . . 
H34A H 0.5422 0.4037 1.0390 0.042 Uiso 1 1 calc R . . 
C22 C 0.32248(15) 0.17489(15) 1.01009(13) 0.0253(4) Uani 1 1 d . . . 
C26 C 0.38178(18) -0.03690(17) 1.18046(15) 0.0354(4) Uani 1 1 d . . . 
H26A H 0.4353 -0.0314 1.1217 0.042 Uiso 1 1 calc R . . 
C9 C -0.1786(2) 0.24640(19) 1.21010(16) 0.0397(5) Uani 1 1 d . . . 
H9A H -0.2388 0.2132 1.2551 0.048 Uiso 1 1 calc R . . 
O6 O 0.44689(18) 0.2667(2) 0.62846(14) 0.0679(6) Uani 1 1 d . . . 
N4 N 0.03190(17) 0.03142(15) 1.15101(15) 0.0419(4) Uani 1 1 d . . . 
C40 C 0.3257(2) 0.47720(18) 0.78306(17) 0.0398(5) Uani 1 1 d . . . 
H40A H 0.2537 0.5029 0.7633 0.048 Uiso 1 1 calc R . . 
C21 C 0.11392(19) 0.45229(17) 0.60115(15) 0.0347(4) Uani 1 1 d . . . 
H21A H 0.1036 0.5253 0.6029 0.042 Uiso 1 1 calc R . . 
C32 C 0.45126(17) 0.19765(18) 1.21643(16) 0.0348(4) Uani 1 1 d . . . 
H32A H 0.4539 0.1612 1.2830 0.042 Uiso 1 1 calc R . . 
C12 C -0.20811(17) 0.52646(18) 0.81157(16) 0.0354(4) Uani 1 1 d . . . 
H12A H -0.2701 0.5829 0.7960 0.042 Uiso 1 1 calc R . . 
N2 N 0.29158(17) 0.05498(17) 0.79795(15) 0.0435(4) Uani 1 1 d . . . 
C17 C 0.1447(2) 0.23804(18) 0.59210(16) 0.0399(5) Uani 1 1 d . . . 
H17A H 0.1539 0.1655 0.5895 0.048 Uiso 1 1 calc R . . 
C41 C 0.33113(18) 0.41379(16) 0.87956(15) 0.0327(4) Uani 1 1 d . . . 
H41A H 0.2629 0.3970 0.9236 0.039 Uiso 1 1 calc R . . 
C20 C 0.1915(2) 0.41981(19) 0.52413(15) 0.0385(5) Uani 1 1 d . . . 
H20A H 0.2332 0.4712 0.4754 0.046 Uiso 1 1 calc R . . 
C33 C 0.50627(18) 0.28913(19) 1.16942(17) 0.0374(5) Uani 1 1 d . . . 
H33A H 0.5452 0.3143 1.2044 0.045 Uiso 1 1 calc R . . 
C27 C 0.3417(2) -0.13641(19) 1.23121(17) 0.0419(5) Uani 1 1 d . . . 
H27A H 0.3695 -0.1970 1.2061 0.050 Uiso 1 1 calc R . . 
C18 C 0.20818(19) 0.31207(19) 0.51840(15) 0.0362(4) Uani 1 1 d . . . 
C31 C 0.2614(2) 0.0439(2) 1.30354(17) 0.0432(5) Uani 1 1 d . . . 
H31A H 0.2335 0.1044 1.3287 0.052 Uiso 1 1 calc R . . 
C6 C 0.0055(2) 0.3041(2) 1.17490(17) 0.0429(5) Uani 1 1 d . . . 
H6A H 0.0706 0.3102 1.1960 0.051 Uiso 1 1 calc R . . 
C39 C 0.4252(2) 0.50330(18) 0.71519(17) 0.0426(5) Uani 1 1 d . . . 
C5 C -0.00129(18) 0.34513(18) 1.07500(15) 0.0354(4) Uani 1 1 d . . . 
H5A H 0.0592 0.3781 1.0301 0.043 Uiso 1 1 calc R . . 
C38 C 0.5314(2) 0.46447(19) 0.74703(18) 0.0429(5) Uani 1 1 d . . . 
H38A H 0.5995 0.4808 0.7025 0.051 Uiso 1 1 calc R . . 
C30 C 0.2212(2) -0.0555(2) 1.35336(18) 0.0490(6) Uani 1 1 d . . . 
H30A H 0.1663 -0.0607 1.4114 0.059 Uiso 1 1 calc R . . 
C10 C -0.18633(18) 0.28729(18) 1.11048(15) 0.0343(4) Uani 1 1 d . . . 
H10A H -0.2516 0.2812 1.0895 0.041 Uiso 1 1 calc R . . 
O7 O 0.2407(2) -0.15114(16) 1.03409(19) 0.0794(7) Uani 1 1 d . . . 
C7 C -0.0824(2) 0.25416(18) 1.24399(16) 0.0396(5) Uani 1 1 d . . . 
C37 C 0.53778(19) 0.40154(18) 0.84429(17) 0.0376(5) Uani 1 1 d . . . 
H37A H 0.6098 0.3773 0.8643 0.045 Uiso 1 1 calc R . . 
C28 C 0.2614(2) -0.1477(2) 1.31825(17) 0.0433(5) Uani 1 1 d . . . 
O5 O 0.2881(2) -0.0163(2) 0.7688(2) 0.0868(8) Uani 1 1 d . . . 
C19 C 0.2930(2) 0.2767(2) 0.43475(18) 0.0525(6) Uani 1 1 d . . . 
H19A H 0.2930 0.1998 0.4430 0.079 Uiso 1 1 calc R . . 
H19B H 0.3696 0.2871 0.4355 0.079 Uiso 1 1 calc R . . 
H19C H 0.2703 0.3207 0.3726 0.079 Uiso 1 1 calc R . . 
C8 C -0.0739(3) 0.2081(3) 1.35276(19) 0.0619(7) Uani 1 1 d . . . 
H8A H -0.0020 0.2205 1.3626 0.093 Uiso 1 1 calc R . . 
H8B H -0.0763 0.1299 1.3739 0.093 Uiso 1 1 calc R . . 
H8C H -0.1379 0.2445 1.3908 0.093 Uiso 1 1 calc R . . 
C29 C 0.2208(3) -0.2578(2) 1.3745(2) 0.0636(8) Uani 1 1 d . . . 
H29A H 0.2576 -0.3114 1.3391 0.095 Uiso 1 1 calc R . . 
H29B H 0.1379 -0.2490 1.3806 0.095 Uiso 1 1 calc R . . 
H29C H 0.2411 -0.2828 1.4393 0.095 Uiso 1 1 calc R . . 
C200 C 0.5110(8) 0.0477(6) 0.5463(5) 0.078(2) Uani 0.50 1 d P . . 
Cl2 Cl 0.6211(3) 0.0886(3) 0.44435(17) 0.1343(13) Uani 0.50 1 d P . . 
C42 C 0.4180(3) 0.5727(3) 0.6095(2) 0.0653(8) Uani 1 1 d . . . 
H42A H 0.4949 0.5824 0.5731 0.098 Uiso 1 1 calc R . . 
H42B H 0.3721 0.6438 0.6096 0.098 Uiso 1 1 calc R . . 
H42C H 0.3825 0.5358 0.5788 0.098 Uiso 1 1 calc R . . 
Cl1 Cl 0.4328(2) -0.0369(2) 0.5277(2) 0.1014(7) Uani 0.50 1 d P . . 
  
loop_ 
 _atom_site_aniso_label 
 _atom_site_aniso_U_11 
 _atom_site_aniso_U_22 
 _atom_site_aniso_U_33 
 _atom_site_aniso_U_23 
 _atom_site_aniso_U_13 
 _atom_site_aniso_U_12 
Co1 0.02987(15) 0.02457(14) 0.03464(15) -0.00396(10) -0.00952(11) -0.00566(10) 
Co2 0.02538(14) 0.03648(16) 0.02777(14) -0.01484(11) -0.00457(10) -0.00063(11) 
O4 0.0233(6) 0.0311(7) 0.0281(6) -0.0088(5) -0.0044(5) -0.0005(5) 
O1 0.0256(6) 0.0301(7) 0.0283(6) -0.0071(5) -0.0055(5) -0.0060(5) 
O2 0.0258(6) 0.0343(7) 0.0301(7) -0.0148(6) -0.0073(5) 0.0013(5) 
O3 0.0296(7) 0.0273(7) 0.0351(7) -0.0047(5) -0.0105(6) -0.0060(5) 
C1 0.0265(9) 0.0293(9) 0.0242(8) -0.0107(7) -0.0071(7) -0.0029(7) 
C36 0.0319(10) 0.0245(9) 0.0373(10) -0.0133(8) -0.0056(8) -0.0044(7) 
C4 0.0268(9) 0.0282(9) 0.0284(9) -0.0114(7) -0.0029(7) -0.0021(7) 
C2 0.0222(8) 0.0263(9) 0.0284(9) -0.0079(7) -0.0052(7) -0.0045(7) 
C23 0.0209(8) 0.0305(9) 0.0308(9) -0.0138(7) -0.0055(7) -0.0004(7) 
C15 0.0285(9) 0.0296(9) 0.0245(9) -0.0071(7) -0.0086(7) -0.0007(7) 
C3 0.0228(8) 0.0302(9) 0.0309(9) -0.0104(7) -0.0046(7) -0.0057(7) 
N1 0.0343(9) 0.0576(12) 0.0321(9) -0.0123(8) -0.0044(8) -0.0049(8) 
C24 0.0228(8) 0.0367(10) 0.0290(9) -0.0141(8) -0.0045(7) 0.0012(7) 
C11 0.0252(9) 0.0354(10) 0.0347(10) -0.0138(8) -0.0035(8) -0.0014(8) 
C35 0.0230(8) 0.0309(10) 0.0356(10) -0.0148(8) -0.0048(7) -0.0008(7) 
C25 0.0283(9) 0.0377(10) 0.0269(9) -0.0099(8) -0.0092(7) -0.0010(8) 
C13 0.0333(10) 0.0344(10) 0.0310(10) -0.0063(8) -0.0109(8) -0.0004(8) 
C14 0.0250(9) 0.0290(9) 0.0290(9) -0.0088(7) -0.0059(7) -0.0032(7) 
C16 0.0426(11) 0.0312(10) 0.0305(10) -0.0093(8) -0.0046(8) -0.0077(8) 
O8 0.0789(14) 0.0471(11) 0.0574(12) -0.0003(9) 0.0143(10) -0.0202(10) 
N3 0.0513(11) 0.0352(10) 0.0518(11) -0.0148(8) -0.0211(9) 0.0004(8) 
C34 0.0276(9) 0.0349(11) 0.0474(12) -0.0191(9) -0.0087(9) -0.0032(8) 
C22 0.0253(8) 0.0220(8) 0.0280(9) -0.0065(7) -0.0081(7) -0.0001(7) 
C26 0.0335(10) 0.0357(11) 0.0307(10) -0.0079(8) -0.0063(8) 0.0051(8) 
C9 0.0393(11) 0.0409(12) 0.0334(11) -0.0088(9) 0.0027(9) -0.0076(9) 
O6 0.0574(12) 0.0998(17) 0.0346(9) -0.0084(10) 0.0040(8) -0.0172(11) 
N4 0.0412(10) 0.0332(10) 0.0451(11) -0.0025(8) -0.0033(8) -0.0110(8) 
C40 0.0477(12) 0.0339(11) 0.0417(12) -0.0115(9) -0.0174(10) -0.0031(9) 
C21 0.0414(11) 0.0288(10) 0.0311(10) -0.0073(8) -0.0049(8) -0.0034(8) 
C32 0.0283(9) 0.0468(12) 0.0327(10) -0.0188(9) -0.0090(8) 0.0024(8) 
C12 0.0271(9) 0.0347(11) 0.0418(11) -0.0107(9) -0.0112(8) 0.0055(8) 
N2 0.0418(10) 0.0455(11) 0.0509(11) -0.0257(9) -0.0107(9) -0.0017(8) 
C17 0.0547(13) 0.0321(11) 0.0346(11) -0.0135(8) -0.0107(10) -0.0015(9) 
C41 0.0320(10) 0.0309(10) 0.0370(10) -0.0127(8) -0.0054(8) -0.0047(8) 
C20 0.0418(12) 0.0390(11) 0.0293(10) -0.0065(8) -0.0006(9) -0.0066(9) 
C33 0.0295(10) 0.0470(12) 0.0464(12) -0.0269(10) -0.0130(9) -0.0007(9) 
C27 0.0461(12) 0.0334(11) 0.0432(12) -0.0088(9) -0.0166(10) 0.0054(9) 
C18 0.0369(11) 0.0430(12) 0.0269(9) -0.0117(8) -0.0084(8) 0.0029(9) 
C31 0.0460(12) 0.0527(14) 0.0350(11) -0.0214(10) 0.0015(9) -0.0123(10) 
C6 0.0421(12) 0.0527(14) 0.0390(12) -0.0145(10) -0.0138(10) -0.0087(10) 
C39 0.0630(15) 0.0320(11) 0.0351(11) -0.0091(9) -0.0076(10) -0.0140(10) 
C5 0.0326(10) 0.0430(12) 0.0329(10) -0.0110(9) -0.0043(8) -0.0119(9) 
C38 0.0468(13) 0.0381(12) 0.0430(12) -0.0132(9) 0.0043(10) -0.0160(10) 
C30 0.0479(13) 0.0635(16) 0.0342(11) -0.0128(11) 0.0041(10) -0.0197(12) 
C10 0.0290(9) 0.0390(11) 0.0337(10) -0.0104(8) -0.0028(8) -0.0058(8) 
O7 0.1064(18) 0.0411(11) 0.1023(18) -0.0350(11) -0.0528(15) 0.0228(11) 
C7 0.0490(13) 0.0377(11) 0.0291(10) -0.0103(8) -0.0060(9) -0.0004(9) 
C37 0.0341(10) 0.0341(11) 0.0461(12) -0.0143(9) -0.0032(9) -0.0087(8) 
C28 0.0433(12) 0.0447(13) 0.0409(12) -0.0017(10) -0.0169(10) -0.0106(10) 
O5 0.0992(18) 0.0721(15) 0.119(2) -0.0669(15) -0.0252(15) -0.0099(13) 
C19 0.0604(16) 0.0538(15) 0.0354(12) -0.0179(11) -0.0012(11) 0.0064(12) 
C8 0.0750(19) 0.0727(19) 0.0317(12) -0.0094(12) -0.0120(12) -0.0048(15) 
C29 0.0736(19) 0.0536(16) 0.0604(17) 0.0024(13) -0.0176(15) -0.0260(14) 
C200 0.112(6) 0.077(5) 0.043(3) -0.005(3) -0.027(4) -0.012(4) 
Cl2 0.137(2) 0.198(3) 0.0624(12) 0.0148(16) -0.0291(13) -0.080(2) 
C42 0.094(2) 0.0576(17) 0.0412(14) -0.0009(12) -0.0135(15) -0.0241(16) 
Cl1 0.0955(16) 0.0793(14) 0.132(2) -0.0211(14) -0.0565(16) 0.0059(12) 
  
_geom_special_details 
; 
 All esds (except the esd in the dihedral angle between two l.s. planes) 
 are estimated using the full covariance matrix.  The cell esds are taken 
 into account individually in the estimation of esds in distances, angles 
 and torsion angles; correlations between esds in cell parameters are only 
 used when they are defined by crystal symmetry.  An approximate (isotropic) 
 treatment of cell esds is used for estimating esds involving l.s. planes. 
; 
  
loop_ 
 _geom_bond_atom_site_label_1 
 _geom_bond_atom_site_label_2 
 _geom_bond_distance 
 _geom_bond_site_symmetry_2 
 _geom_bond_publ_flag 
Co1 N3 1.660(2) . ? 
Co1 N4 1.662(2) . ? 
Co1 O1 1.9815(13) . ? 
Co1 O3 1.9830(13) . ? 
Co2 N2 1.6568(19) . ? 
Co2 N1 1.6701(19) . ? 
Co2 O2 1.9738(13) . ? 
Co2 O4 1.9784(13) . ? 
O4 C1 1.253(2) . ? 
O1 C22 1.252(2) . ? 
O2 C22 1.259(2) . ? 
O3 C1 1.258(2) . ? 
C1 C2 1.509(2) . ? 
C36 C37 1.388(3) . ? 
C36 C41 1.396(3) . ? 
C36 C35 1.491(3) . ? 
C4 C5 1.387(3) . ? 
C4 C10 1.392(3) . ? 
C4 C3 1.489(3) . ? 
C2 C3 1.403(3) . ? 
C2 C14 1.404(3) . ? 
C23 C24 1.404(3) . ? 
C23 C35 1.404(3) . ? 
C23 C22 1.509(2) . ? 
C15 C21 1.387(3) . ? 
C15 C16 1.388(3) . ? 
C15 C14 1.489(3) . ? 
C3 C11 1.395(3) . ? 
N1 O6 1.158(3) . ? 
C24 C32 1.395(3) . ? 
C24 C25 1.490(3) . ? 
C11 C12 1.384(3) . ? 
C35 C34 1.393(3) . ? 
C25 C26 1.387(3) . ? 
C25 C31 1.387(3) . ? 
C13 C12 1.382(3) . ? 
C13 C14 1.396(3) . ? 
C16 C17 1.387(3) . ? 
O8 N4 1.163(3) . ? 
N3 O7 1.144(3) . ? 
C34 C33 1.380(3) . ? 
C26 C27 1.385(3) . ? 
C9 C10 1.384(3) . ? 
C9 C7 1.389(3) . ? 
C40 C41 1.380(3) . ? 
C40 C39 1.383(3) . ? 
C21 C20 1.387(3) . ? 
C32 C33 1.381(3) . ? 
N2 O5 1.141(3) . ? 
C17 C18 1.383(3) . ? 
C20 C18 1.387(3) . ? 
C27 C28 1.380(3) . ? 
C18 C19 1.509(3) . ? 
C31 C30 1.383(3) . ? 
C6 C7 1.383(3) . ? 
C6 C5 1.385(3) . ? 
C39 C38 1.388(4) . ? 
C39 C42 1.513(3) . ? 
C38 C37 1.389(3) . ? 
C30 C28 1.388(4) . ? 
C7 C8 1.512(3) . ? 
C28 C29 1.514(3) . ? 
C200 Cl1 1.156(8) 2_656 ? 
C200 Cl1 1.706(8) . ? 
C200 Cl2 1.757(8) . ? 
Cl2 Cl1 0.959(3) 2_656 ? 
Cl1 Cl2 0.959(3) 2_656 ? 
Cl1 C200 1.156(8) 2_656 ? 
Cl1 Cl1 1.931(6) 2_656 ? 
  
loop_ 
 _geom_angle_atom_site_label_1 
 _geom_angle_atom_site_label_2 
 _geom_angle_atom_site_label_3 
 _geom_angle 
 _geom_angle_site_symmetry_1 
 _geom_angle_site_symmetry_3 
 _geom_angle_publ_flag 
N3 Co1 N4 109.76(10) . . ? 
N3 Co1 O1 114.71(8) . . ? 
N4 Co1 O1 106.53(8) . . ? 
N3 Co1 O3 120.16(8) . . ? 
N4 Co1 O3 110.04(8) . . ? 
O1 Co1 O3 94.16(5) . . ? 
N2 Co2 N1 110.38(10) . . ? 
N2 Co2 O2 116.06(8) . . ? 
N1 Co2 O2 110.73(8) . . ? 
N2 Co2 O4 117.41(8) . . ? 
N1 Co2 O4 106.94(8) . . ? 
O2 Co2 O4 94.12(5) . . ? 
C1 O4 Co2 128.52(12) . . ? 
C22 O1 Co1 131.14(12) . . ? 
C22 O2 Co2 128.34(12) . . ? 
C1 O3 Co1 128.72(12) . . ? 
O4 C1 O3 126.50(17) . . ? 
O4 C1 C2 116.64(16) . . ? 
O3 C1 C2 116.84(16) . . ? 
C37 C36 C41 118.1(2) . . ? 
C37 C36 C35 120.95(18) . . ? 
C41 C36 C35 120.95(18) . . ? 
C5 C4 C10 118.27(18) . . ? 
C5 C4 C3 120.65(17) . . ? 
C10 C4 C3 121.02(17) . . ? 
C3 C2 C14 120.46(17) . . ? 
C3 C2 C1 120.24(16) . . ? 
C14 C2 C1 119.28(16) . . ? 
C24 C23 C35 120.62(17) . . ? 
C24 C23 C22 118.79(17) . . ? 
C35 C23 C22 120.59(17) . . ? 
C21 C15 C16 118.02(18) . . ? 
C21 C15 C14 121.60(18) . . ? 
C16 C15 C14 120.36(18) . . ? 
C11 C3 C2 118.80(18) . . ? 
C11 C3 C4 118.61(17) . . ? 
C2 C3 C4 122.47(16) . . ? 
O6 N1 Co2 162.9(2) . . ? 
C32 C24 C23 118.87(19) . . ? 
C32 C24 C25 118.75(18) . . ? 
C23 C24 C25 122.22(17) . . ? 
C12 C11 C3 120.95(18) . . ? 
C34 C35 C23 118.54(19) . . ? 
C34 C35 C36 118.78(18) . . ? 
C23 C35 C36 122.62(17) . . ? 
C26 C25 C31 118.1(2) . . ? 
C26 C25 C24 120.38(18) . . ? 
C31 C25 C24 121.43(19) . . ? 
C12 C13 C14 120.65(19) . . ? 
C13 C14 C2 119.07(17) . . ? 
C13 C14 C15 118.76(17) . . ? 
C2 C14 C15 122.11(16) . . ? 
C17 C16 C15 120.7(2) . . ? 
O7 N3 Co1 164.0(2) . . ? 
C33 C34 C35 121.2(2) . . ? 
O1 C22 O2 126.62(17) . . ? 
O1 C22 C23 116.19(16) . . ? 
O2 C22 C23 117.19(16) . . ? 
C27 C26 C25 120.6(2) . . ? 
C10 C9 C7 121.1(2) . . ? 
O8 N4 Co1 161.76(19) . . ? 
C41 C40 C39 121.3(2) . . ? 
C20 C21 C15 120.87(19) . . ? 
C33 C32 C24 120.77(19) . . ? 
C13 C12 C11 120.04(18) . . ? 
O5 N2 Co2 165.4(2) . . ? 
C18 C17 C16 121.4(2) . . ? 
C40 C41 C36 120.8(2) . . ? 
C21 C20 C18 121.2(2) . . ? 
C34 C33 C32 119.98(18) . . ? 
C28 C27 C26 121.5(2) . . ? 
C17 C18 C20 117.75(19) . . ? 
C17 C18 C19 121.1(2) . . ? 
C20 C18 C19 121.1(2) . . ? 
C30 C31 C25 120.9(2) . . ? 
C7 C6 C5 121.5(2) . . ? 
C40 C39 C38 118.1(2) . . ? 
C40 C39 C42 120.8(2) . . ? 
C38 C39 C42 121.2(2) . . ? 
C6 C5 C4 120.5(2) . . ? 
C39 C38 C37 121.1(2) . . ? 
C31 C30 C28 121.1(2) . . ? 
C9 C10 C4 120.7(2) . . ? 
C6 C7 C9 117.8(2) . . ? 
C6 C7 C8 121.3(2) . . ? 
C9 C7 C8 120.8(2) . . ? 
C36 C37 C38 120.7(2) . . ? 
C27 C28 C30 117.8(2) . . ? 
C27 C28 C29 120.9(3) . . ? 
C30 C28 C29 121.3(2) . . ? 
Cl1 C200 Cl1 82.5(5) 2_656 . ? 
Cl1 C200 Cl2 30.4(3) 2_656 . ? 
Cl1 C200 Cl2 112.2(5) . . ? 
Cl1 Cl2 C200 37.6(3) 2_656 . ? 
Cl2 Cl1 C200 112.0(6) 2_656 2_656 ? 
Cl2 Cl1 C200 148.1(5) 2_656 . ? 
C200 Cl1 C200 97.5(5) 2_656 . ? 
Cl2 Cl1 Cl1 167.0(4) 2_656 2_656 ? 
C200 Cl1 Cl1 61.1(5) 2_656 2_656 ? 
C200 Cl1 Cl1 36.4(3) . 2_656 ? 
  
_diffrn_measured_fraction_theta_max    0.904 
_diffrn_reflns_theta_full              28.30 
_diffrn_measured_fraction_theta_full   0.904 
_refine_diff_density_max    0.643 
_refine_diff_density_min   -0.438 
_refine_diff_density_rms    0.147 


#===END


  
data_Compound5 
  
_audit_creation_method            SHELXL-97 
_chemical_name_systematic 
; 
 ? 
; 
_chemical_name_common             ? 
_chemical_melting_point           ? 
_chemical_formula_moiety          ? 
_chemical_formula_sum 
 'C64 H80 N16 O12 S4' 
_chemical_formula_weight          1393.68 
  
loop_ 
 _atom_type_symbol 
 _atom_type_description 
 _atom_type_scat_dispersion_real 
 _atom_type_scat_dispersion_imag 
 _atom_type_scat_source 
 'C'  'C'   0.0033   0.0016 
 'International Tables Vol C Tables 4.2.6.8 and 6.1.1.4' 
 'H'  'H'   0.0000   0.0000 
 'International Tables Vol C Tables 4.2.6.8 and 6.1.1.4' 
 'N'  'N'   0.0061   0.0033 
 'International Tables Vol C Tables 4.2.6.8 and 6.1.1.4' 
 'O'  'O'   0.0106   0.0060 
 'International Tables Vol C Tables 4.2.6.8 and 6.1.1.4' 
 'S'  'S'   0.1246   0.1234 
 'International Tables Vol C Tables 4.2.6.8 and 6.1.1.4' 
  
_symmetry_cell_setting            Monoclinic 
_symmetry_space_group_name_H-M    C2/c 
  
loop_ 
 _symmetry_equiv_pos_as_xyz 
 'x, y, z' 
 '-x, y, -z+1/2' 
 'x+1/2, y+1/2, z' 
 '-x+1/2, y+1/2, -z+1/2' 
 '-x, -y, -z' 
 'x, -y, z-1/2' 
 '-x+1/2, -y+1/2, -z' 
 'x+1/2, -y+1/2, z-1/2' 
  
_cell_length_a                    28.320(13) 
_cell_length_b                    6.594(3) 
_cell_length_c                    19.966(9) 
_cell_angle_alpha                 90.00 
_cell_angle_beta                  117.454(7) 
_cell_angle_gamma                 90.00 
_cell_volume                      3309(3) 
_cell_formula_units_Z             2 
_cell_measurement_temperature     173(2) 
_cell_measurement_reflns_used     1006 
_cell_measurement_theta_min       2.99 
_cell_measurement_theta_max       23.96 
  
_exptl_crystal_description        needle 
_exptl_crystal_colour             'light yellow' 
_exptl_crystal_size_max           0.4 
_exptl_crystal_size_mid           0.1 
_exptl_crystal_size_min           0.02 
_exptl_crystal_density_meas       0 
_exptl_crystal_density_diffrn     1.399 
_exptl_crystal_density_method     'not measured' 
_exptl_crystal_F_000              1472 
_exptl_absorpt_coefficient_mu     0.219 
_exptl_absorpt_correction_type    'sadabs' 
_exptl_absorpt_correction_T_min   0.840315 
_exptl_absorpt_correction_T_max   1.000000 
_exptl_absorpt_process_details    ? 
  
_exptl_special_details 
; 
 ? 
; 
  
_diffrn_ambient_temperature       173(2) 
_diffrn_radiation_wavelength      0.71073 
_diffrn_radiation_type            MoK\a 
_diffrn_radiation_source          'fine-focus sealed tube' 
_diffrn_radiation_monochromator   graphite 
_diffrn_measurement_device_type   'CCD area detector' 
_diffrn_measurement_method        'phi and omega scans' 
_diffrn_detector_area_resol_mean  ? 
_diffrn_standards_number          ? 
_diffrn_standards_interval_count  ? 
_diffrn_standards_interval_time   ? 
_diffrn_standards_decay_%         ? 
_diffrn_reflns_number             14013 
_diffrn_reflns_av_R_equivalents   0.0430 
_diffrn_reflns_av_sigmaI/netI     0.0450 
_diffrn_reflns_limit_h_min        -37 
_diffrn_reflns_limit_h_max        37 
_diffrn_reflns_limit_k_min        -8 
_diffrn_reflns_limit_k_max        8 
_diffrn_reflns_limit_l_min        -26 
_diffrn_reflns_limit_l_max        26 
_diffrn_reflns_theta_min          1.62 
_diffrn_reflns_theta_max          28.32 
_reflns_number_total              3918 
_reflns_number_gt                 2927 
_reflns_threshold_expression      >2sigma(I) 
  
_computing_data_collection        'Bruker SMART' 
_computing_cell_refinement        'Bruker SMART' 
_computing_data_reduction         'Bruker SAINT' 
_computing_structure_solution     'SHELXS-97 (Sheldrick, 1990)' 
_computing_structure_refinement   'SHELXL-97 (Sheldrick, 1997)' 
_computing_molecular_graphics     'Bruker SHELXTL' 
_computing_publication_material   'Bruker SHELXTL' 
  
_refine_special_details 
; 
 Refinement of F^2^ against ALL reflections.  The weighted R-factor wR and 
 goodness of fit S are based on F^2^, conventional R-factors R are based 
 on F, with F set to zero for negative F^2^. The threshold expression of 
 F^2^ > 2sigma(F^2^) is used only for calculating R-factors(gt) etc. and is 
 not relevant to the choice of reflections for refinement.  R-factors based 
 on F^2^ are statistically about twice as large as those based on F, and R- 
 factors based on ALL data will be even larger. 
; 
  
_refine_ls_structure_factor_coef  Fsqd 
_refine_ls_matrix_type            full 
_refine_ls_weighting_scheme       calc 
_refine_ls_weighting_details 
 'calc w=1/[\s^2^(Fo^2^)+(0.0472P)^2^+3.1596P] where P=(Fo^2^+2Fc^2^)/3' 
_atom_sites_solution_primary      direct 
_atom_sites_solution_secondary    difmap 
_atom_sites_solution_hydrogens    geom 
_refine_ls_hydrogen_treatment     mixed 
_refine_ls_extinction_method      none 
_refine_ls_extinction_coef        ? 
_refine_ls_number_reflns          3918 
_refine_ls_number_parameters      307 
_refine_ls_number_restraints      0 
_refine_ls_R_factor_all           0.0865 
_refine_ls_R_factor_gt            0.0600 
_refine_ls_wR_factor_ref          0.1317 
_refine_ls_wR_factor_gt           0.1215 
_refine_ls_goodness_of_fit_ref    1.109 
_refine_ls_restrained_S_all       1.109 
_refine_ls_shift/su_max           0.000 
_refine_ls_shift/su_mean          0.000 
  
loop_ 
 _atom_site_label 
 _atom_site_type_symbol 
 _atom_site_fract_x 
 _atom_site_fract_y 
 _atom_site_fract_z 
 _atom_site_U_iso_or_equiv 
 _atom_site_adp_type 
 _atom_site_occupancy 
 _atom_site_symmetry_multiplicity 
 _atom_site_calc_flag 
 _atom_site_refinement_flags 
 _atom_site_disorder_assembly 
 _atom_site_disorder_group 
S1 S 0.08779(2) 0.61691(9) 0.12782(3) 0.03213(17) Uani 1 1 d . . . 
N3 N 0.29009(8) 0.3994(3) 0.45393(11) 0.0365(5) Uani 1 1 d . . . 
O1 O 0.06938(7) 0.8212(3) 0.10755(9) 0.0429(4) Uani 1 1 d . . . 
O2 O 0.10885(7) 0.5128(3) 0.08486(9) 0.0393(4) Uani 1 1 d . . . 
C1 C 0.25285(9) 0.3556(4) 0.37754(12) 0.0311(5) Uani 1 1 d . . . 
C2 C 0.13510(9) 0.6233(4) 0.22525(12) 0.0308(5) Uani 1 1 d . . . 
N2 N 0.03562(7) 0.4864(3) 0.11874(11) 0.0325(5) Uani 1 1 d . . . 
C3 C 0.17418(8) 0.4694(3) 0.26132(12) 0.0275(5) Uani 1 1 d . . . 
C4 C 0.21099(9) 0.4979(4) 0.33926(12) 0.0295(5) Uani 1 1 d . . . 
C5 C 0.17910(9) 0.2889(4) 0.22552(13) 0.0307(5) Uani 1 1 d . . . 
C6 C 0.16558(11) 0.8065(4) 0.34208(14) 0.0384(6) Uani 1 1 d . . . 
C7 C 0.20460(10) 0.6687(4) 0.37783(14) 0.0363(6) Uani 1 1 d . . . 
C8 C 0.21772(9) 0.1518(4) 0.26451(14) 0.0340(5) Uani 1 1 d . . . 
C9 C 0.03984(10) 0.2645(4) 0.12267(16) 0.0397(6) Uani 1 1 d . . . 
N1 N -0.04601(8) 0.2626(4) 0.12204(12) 0.0461(6) Uani 1 1 d . A . 
C10 C 0.25526(9) 0.1844(4) 0.34049(14) 0.0350(5) Uani 1 1 d . . . 
C11 C 0.31465(11) 0.2217(5) 0.50015(15) 0.0430(7) Uani 1 1 d . . . 
C12 C 0.13106(10) 0.7868(4) 0.26466(14) 0.0371(6) Uani 1 1 d . . . 
C13 C -0.01607(11) 0.1761(5) 0.08658(17) 0.0463(7) Uani 1 1 d . . . 
C14 C -0.04934(11) 0.4813(5) 0.12152(17) 0.0458(7) Uani 1 1 d . . . 
C15 C 0.00714(10) 0.5677(5) 0.15863(16) 0.0401(6) Uani 1 1 d . . . 
C16 C 0.33022(12) 0.5486(5) 0.46054(17) 0.0479(7) Uani 1 1 d . . . 
N4 N -0.06075(13) 0.1514(9) 0.1643(2) 0.0763(10) Uani 1 1 d . . . 
O3A O -0.05279(18) -0.0088(9) 0.1769(3) 0.0725(19) Uani 0.545(8) 1 d P A 1 
O3 O -0.0803(3) 0.2055(9) 0.1928(3) 0.069(2) Uani 0.455(8) 1 d P A 2 
H5A H 0.1549(8) 0.264(3) 0.1735(11) 0.009(5) Uiso 1 1 d . . . 
H7A H 0.2299(9) 0.690(3) 0.4272(13) 0.029(6) Uiso 1 1 d . . . 
H11D H 0.3318(10) 0.264(4) 0.5546(15) 0.043(7) Uiso 1 1 d . . . 
H8A H 0.2203(9) 0.037(4) 0.2434(13) 0.034(7) Uiso 1 1 d . . . 
H10A H 0.2818(9) 0.080(3) 0.3652(12) 0.028(6) Uiso 1 1 d . . . 
H14B H -0.0682(11) 0.529(4) 0.0694(16) 0.048(8) Uiso 1 1 d . . . 
H12A H 0.1031(11) 0.891(4) 0.2361(14) 0.047(8) Uiso 1 1 d . . . 
H11C H 0.3405(11) 0.155(4) 0.4878(14) 0.044(7) Uiso 1 1 d . . . 
H16C H 0.3128(11) 0.675(5) 0.4331(16) 0.056(9) Uiso 1 1 d . . . 
H11A H 0.2877(11) 0.121(4) 0.4943(15) 0.044(8) Uiso 1 1 d . . . 
H9B H 0.0567(11) 0.222(4) 0.0974(15) 0.043(8) Uiso 1 1 d . . . 
H14A H -0.0677(12) 0.525(4) 0.1489(16) 0.058(9) Uiso 1 1 d . . . 
H15B H 0.0059(10) 0.707(4) 0.1557(13) 0.035(7) Uiso 1 1 d . . . 
H6A H 0.1626(10) 0.926(4) 0.3676(14) 0.043(7) Uiso 1 1 d . . . 
H9A H 0.0597(10) 0.222(4) 0.1784(15) 0.043(7) Uiso 1 1 d . . . 
H16B H 0.3498(10) 0.593(4) 0.5115(16) 0.043(7) Uiso 1 1 d . . . 
H16A H 0.3541(13) 0.501(5) 0.4418(17) 0.067(10) Uiso 1 1 d . . . 
H15A H 0.0257(11) 0.536(4) 0.2127(16) 0.048(8) Uiso 1 1 d . . . 
H13B H -0.0153(11) 0.031(5) 0.0926(15) 0.052(8) Uiso 1 1 d . . . 
H13A H -0.0354(11) 0.209(4) 0.0323(17) 0.054(8) Uiso 1 1 d . . . 
  
loop_ 
 _atom_site_aniso_label 
 _atom_site_aniso_U_11 
 _atom_site_aniso_U_22 
 _atom_site_aniso_U_33 
 _atom_site_aniso_U_23 
 _atom_site_aniso_U_13 
 _atom_site_aniso_U_12 
S1 0.0291(3) 0.0390(4) 0.0296(3) 0.0075(3) 0.0147(2) 0.0018(3) 
N3 0.0312(10) 0.0450(13) 0.0303(10) 0.0014(9) 0.0115(9) 0.0040(10) 
O1 0.0448(10) 0.0399(11) 0.0425(10) 0.0114(8) 0.0189(8) 0.0041(8) 
O2 0.0389(10) 0.0506(11) 0.0352(9) 0.0057(8) 0.0229(8) 0.0018(8) 
C1 0.0255(11) 0.0406(14) 0.0312(11) 0.0028(10) 0.0163(10) 0.0003(10) 
C2 0.0291(11) 0.0338(13) 0.0313(11) 0.0019(10) 0.0155(10) -0.0013(10) 
N2 0.0278(10) 0.0381(12) 0.0330(10) 0.0027(9) 0.0153(9) 0.0007(9) 
C3 0.0249(11) 0.0306(12) 0.0305(11) 0.0045(9) 0.0159(9) -0.0004(9) 
C4 0.0289(12) 0.0325(12) 0.0312(11) 0.0025(10) 0.0175(10) -0.0012(10) 
C5 0.0270(11) 0.0355(13) 0.0320(12) -0.0022(10) 0.0156(10) -0.0021(10) 
C6 0.0486(15) 0.0309(13) 0.0419(14) -0.0054(11) 0.0263(12) 0.0019(12) 
C7 0.0383(14) 0.0398(15) 0.0322(12) -0.0032(11) 0.0174(11) 0.0007(11) 
C8 0.0327(12) 0.0303(13) 0.0447(14) -0.0024(11) 0.0227(11) 0.0035(10) 
C9 0.0353(14) 0.0410(16) 0.0430(15) 0.0045(12) 0.0181(12) 0.0005(12) 
N1 0.0284(11) 0.0602(16) 0.0449(12) 0.0146(11) 0.0128(10) -0.0040(10) 
C10 0.0298(12) 0.0377(14) 0.0394(13) 0.0049(11) 0.0176(11) 0.0067(11) 
C11 0.0361(14) 0.0588(19) 0.0327(13) 0.0047(13) 0.0148(12) 0.0120(14) 
C12 0.0374(14) 0.0357(14) 0.0412(13) 0.0010(11) 0.0207(12) 0.0036(11) 
C13 0.0384(15) 0.0456(18) 0.0471(16) 0.0064(14) 0.0130(13) -0.0041(13) 
C14 0.0306(14) 0.066(2) 0.0420(15) 0.0076(14) 0.0172(13) 0.0062(13) 
C15 0.0360(14) 0.0487(18) 0.0414(14) 0.0014(13) 0.0228(12) 0.0018(12) 
C16 0.0424(16) 0.062(2) 0.0372(15) -0.0038(14) 0.0166(13) -0.0071(15) 
N4 0.0387(16) 0.114(4) 0.063(2) 0.035(2) 0.0112(15) -0.0180(18) 
O3A 0.062(3) 0.080(4) 0.077(3) 0.029(3) 0.033(2) -0.011(3) 
O3 0.071(4) 0.096(4) 0.048(3) -0.007(3) 0.033(3) -0.036(3) 
  
_geom_special_details 
; 
 All esds (except the esd in the dihedral angle between two l.s. planes) 
 are estimated using the full covariance matrix.  The cell esds are taken 
 into account individually in the estimation of esds in distances, angles 
 and torsion angles; correlations between esds in cell parameters are only 
 used when they are defined by crystal symmetry.  An approximate (isotropic) 
 treatment of cell esds is used for estimating esds involving l.s. planes. 
; 
  
loop_ 
 _geom_bond_atom_site_label_1 
 _geom_bond_atom_site_label_2 
 _geom_bond_distance 
 _geom_bond_site_symmetry_2 
 _geom_bond_publ_flag 
S1 O2 1.4263(17) . ? 
S1 O1 1.4337(19) . ? 
S1 N2 1.646(2) . ? 
S1 C2 1.783(2) . ? 
N3 C1 1.428(3) . ? 
N3 C11 1.455(3) . ? 
N3 C16 1.463(4) . ? 
C1 C10 1.368(3) . ? 
C1 C4 1.426(3) . ? 
C2 C12 1.370(3) . ? 
C2 C3 1.428(3) . ? 
N2 C9 1.467(3) . ? 
N2 C15 1.471(3) . ? 
C3 C5 1.428(3) . ? 
C3 C4 1.431(3) . ? 
C4 C7 1.423(3) . ? 
C5 C8 1.354(3) . ? 
C6 C7 1.352(4) . ? 
C6 C12 1.403(3) . ? 
C8 C10 1.411(3) . ? 
C9 C13 1.521(4) . ? 
N1 N4 1.322(3) . ? 
N1 C14 1.445(4) . ? 
N1 C13 1.449(4) . ? 
C14 C15 1.529(4) . ? 
N4 O3 1.025(6) . ? 
N4 O3A 1.085(5) . ? 
  
loop_ 
 _geom_angle_atom_site_label_1 
 _geom_angle_atom_site_label_2 
 _geom_angle_atom_site_label_3 
 _geom_angle 
 _geom_angle_site_symmetry_1 
 _geom_angle_site_symmetry_3 
 _geom_angle_publ_flag 
O2 S1 O1 118.74(11) . . ? 
O2 S1 N2 106.56(11) . . ? 
O1 S1 N2 105.60(11) . . ? 
O2 S1 C2 110.82(11) . . ? 
O1 S1 C2 106.17(11) . . ? 
N2 S1 C2 108.50(10) . . ? 
C1 N3 C11 114.6(2) . . ? 
C1 N3 C16 113.1(2) . . ? 
C11 N3 C16 111.1(2) . . ? 
C10 C1 C4 119.3(2) . . ? 
C10 C1 N3 123.2(2) . . ? 
C4 C1 N3 117.5(2) . . ? 
C12 C2 C3 121.3(2) . . ? 
C12 C2 S1 115.18(18) . . ? 
C3 C2 S1 123.47(18) . . ? 
C9 N2 C15 112.7(2) . . ? 
C9 N2 S1 117.95(17) . . ? 
C15 N2 S1 115.99(17) . . ? 
C2 C3 C5 124.9(2) . . ? 
C2 C3 C4 117.5(2) . . ? 
C5 C3 C4 117.6(2) . . ? 
C7 C4 C1 120.8(2) . . ? 
C7 C4 C3 118.8(2) . . ? 
C1 C4 C3 120.4(2) . . ? 
C8 C5 C3 120.5(2) . . ? 
C7 C6 C12 120.3(2) . . ? 
C6 C7 C4 121.6(2) . . ? 
C5 C8 C10 121.6(2) . . ? 
N2 C9 C13 108.4(2) . . ? 
N4 N1 C14 121.3(4) . . ? 
N4 N1 C13 121.4(4) . . ? 
C14 N1 C13 116.1(2) . . ? 
C1 C10 C8 120.4(2) . . ? 
C2 C12 C6 120.4(2) . . ? 
N1 C13 C9 109.5(2) . . ? 
N1 C14 C15 108.5(2) . . ? 
N2 C15 C14 108.3(2) . . ? 
O3 N4 O3A 108.5(5) . . ? 
O3 N4 N1 124.9(7) . . ? 
O3A N4 N1 126.5(6) . . ? 
  
_diffrn_measured_fraction_theta_max    0.953 
_diffrn_reflns_theta_full              28.32 
_diffrn_measured_fraction_theta_full   0.953 
_refine_diff_density_max    0.482 
_refine_diff_density_min   -0.283 
_refine_diff_density_rms    0.058 
